# Supplementary material for: Socioeconomic inequalities in the delivery of brief interventions for smoking and excessive drinking: findings from a cross-sectional household survey in England
Source: PubMed Central journal article supplement — BMJ Open. 2019 May 1;9(4):e023448. doi: 10.1136/bmjopen-2018-023448 (PMC6501949; doi:10.1136/bmjopen-2018-023448), 2019-05-01
Supplement: bmjopen-2018-023448.draft_revisions.pdf [file bmjopen-2018-023448.draft_revisions.pdf]

# BMJ Open

BMJ Open is committed to open peer review. As part of this commitment we make the peer review history of every article we publish publicly available.

When an article is published we post the peer reviewers' comments and the authors' responses online. We also post the versions of the paper that were used during peer review. These are the versions that the peer review comments apply to.

The versions of the paper that follow are the versions that were submitted during the peer review process. They are not the versions of record or the final published versions. They should not be cited or distributed as the published version of this manuscript.

BMJ Open is an open access journal and the full, final, typeset and author-corrected version of record of the manuscript is available on our site with no access controls, subscription charges or pay-per-view fees (<http://bmjopen.bmj.com>).

If you have any questions on BMJ Open's open peer review process please email [info.bmjopen@bmj.com](mailto:info.bmjopen@bmj.com)

# BMJ Open

## Are Brief Interventions for smoking and excessive alcohol consumption in primary care affecting health inequalities? Findings from a population-based household survey in England

|                               |                                                                                                                                                                                                                                                                                                                                                                                                                                                                                                                                                                                        |
|-------------------------------|----------------------------------------------------------------------------------------------------------------------------------------------------------------------------------------------------------------------------------------------------------------------------------------------------------------------------------------------------------------------------------------------------------------------------------------------------------------------------------------------------------------------------------------------------------------------------------------|
| Journal:                      | <i>BMJ Open</i>                                                                                                                                                                                                                                                                                                                                                                                                                                                                                                                                                                        |
| Manuscript ID                 | bmjopen-2018-023448                                                                                                                                                                                                                                                                                                                                                                                                                                                                                                                                                                    |
| Article Type:                 | Research                                                                                                                                                                                                                                                                                                                                                                                                                                                                                                                                                                               |
| Date Submitted by the Author: | 06-Apr-2018                                                                                                                                                                                                                                                                                                                                                                                                                                                                                                                                                                            |
| Complete List of Authors:     | Angus, Colin; University of Sheffield, School of Health and Related Research<br>Brown, Jamie; University College London, Psychology & Language Sciences<br>Beard, Emma; UCL,<br>Gillespie, Duncan; The University of Sheffield, School of Health and Related Research<br>Buykx, Penelope; University of Sheffield, School of Health and Related Research<br>Kaner, Eileen; Newcastle University, Institute<br>Michie, Susan; University College London, Centre for Outcomes Research and Effectiveness<br>Meier, Petra; University of Sheffield, School of Health and Related Research |
| Keywords:                     | Alcohol, Smoking, Brief Interventions, Health Inequalities, PRIMARY CARE, PUBLIC HEALTH                                                                                                                                                                                                                                                                                                                                                                                                                                                                                                |
|                               |                                                                                                                                                                                                                                                                                                                                                                                                                                                                                                                                                                                        |

SCHOLARONE™  
Manuscripts

1

# Are Brief Interventions for smoking and excessive alcohol consumption in primary care affecting health inequalities? Findings from a population-based household survey in England

Colin Angus\*, MSc, Sheffield Alcohol Research Group, School of Health and Related Research, University of Sheffield, UK

Jamie Brown, PhD, Health Behaviour Research Centre, Department of Epidemiology and Community health, University College London, UK

Emma Beard, PhD, Department of Clinical, Educational and Health Psychology, University College London, UK

Duncan Gillespie, PhD, Sheffield Alcohol Research Group, School of Health and Related Research, University of Sheffield, UK

Penny Buykx, PhD, Sheffield Alcohol Research Group, School of Health and Related Research, University of Sheffield, UK

Eileen Kaner, PhD, Institute of Health and Society, University of Newcastle upon Tyne, UK

Susan Michie, PhD, Department of Clinical, Educational and Health Psychology, University College London, UK

Petra S Meier, PhD, Sheffield Alcohol Research Group, School of Health and Related Research, University of Sheffield, UK

\* Corresponding author

Address: Regent Court, Regent Street, Sheffield, S1 4DA, UK

Tel 0114 2220686.

Email [c.r.angus@sheffield.ac.uk](mailto:c.r.angus@sheffield.ac.uk)

Word count: 3290

Keywords: Alcohol, Smoking, Brief Interventions, Health Inequalities, Primary Care, Public Health

**ABSTRACT****Objectives**

Brief Interventions [BI] for smoking and risky drinking are effective and cost-effective policy approaches to reducing alcohol harm currently used in primary care in England, however little is known about their contribution to health inequalities. This paper aims to investigate whether self-reported receipt of BI is associated with socioeconomic status and whether this differs for smoking or alcohol.

**Design**

Population survey of 8,978 smokers or risk drinkers in England aged 16+ taking part in the Alcohol and Smoking Toolkit Studies

**Measures**

Survey participants answered questions regarding whether they had received advice and support to cut down their drinking or smoking from a primary healthcare professional in the past 12 months as well as their socioeconomic status, demographic details, whether they smoke and their motivation to cut down their smoking and/or drinking. Respondents also completed the Alcohol Use Disorders Identification Test (AUDIT). Smokers were defined as those reporting any smoking in the past year. Risky drinkers were defined as those scoring 8 or more on the AUDIT.

**Results**

After adjusting for demographic factors and patterns in smoking and drinking, there was a positive socioeconomic gradient in BI delivery. Smokers in the lowest social class had 30% (95% CI 5%-61%) greater odds of reporting receipt of a BI than those in the highest class. The relationship for risky drinking was stronger, with those in the lowest social class having 111% (95% CI 27%-252%) greater odds of reporting BI receipt than the highest class. Rates of BI delivery were 8 times greater among smokers than risky drinkers (48.3% vs 6.1%).

**Conclusions**

Current delivery of Brief Interventions for smoking and drinking in primary care in England may be contributing to a reduction in socioeconomic inequalities in health. This effect could be increased if intervention rates, particularly for drinking, can be raised.

**ARTICLE SUMMARY****Strengths and limitations of this study**

- Used data from a large representative sample of adult smokers and drinkers in England
- Based on data on intervention receipt reported by patients, rather than practitioners
- Analysis controls for a broad range of potential confounding demographic factors
- Respondents may have underestimated or misreported their drinking or smoking
- There may be additional socioeconomic gradients in intervention effectiveness which could moderate the overall impact of Brief Interventions on health inequalities

## INTRODUCTION

Tobacco smoking and the excessive consumption of alcohol are leading causes of preventable disease both in the UK and worldwide[1] and inequalities in both alcohol and tobacco-related health harms are a significant contributor to wider inequalities in health [2,3]. Underlying these inequalities are conflicting socioeconomic patterns in the behaviours themselves. Smoking prevalence and related harm both increase with deprivation [4], while alcohol consumption is typically reported to be lower in more deprived groups even though they suffer greater levels of alcohol-related harm [2,5,6], a phenomenon referred to as the 'Alcohol Harm Paradox'[5,7].

Screening and Brief Interventions, consisting of an initial case finding or screening step followed by delivery of feedback and structured advice or behaviour change counselling, delivered in primary care, is an effective and cost-effective measure to increase smoking cessation rates[8,9] and reduce harmful drinking [10,11]. Current UK clinical guidelines recommend that all patients are assessed for smoking annually, with a Brief Intervention (BI) delivered to all smokers [12]. Guidance for alcohol encourages the use of opportunistic screening and BI alongside requirements to screen all patients registering with a new primary care provider or attending a Health Check [13,14]. In spite of this guidance, BI delivery levels remain low in England [15], particularly for alcohol [16], a finding that has been replicated in many other countries [17–19].

Research across a broad range of interventions and settings has found that public health policies, including screening programmes in primary care, may exacerbate inequalities in health even while improving population health overall [20,21]. In this context it is striking that very little research to date has considered the potential for BI programmes for tobacco or alcohol to affect inequalities, particularly given the high socioeconomic variation in poor health due to both behaviours. We aimed to address this gap by examining whether there are sociodemographic gradients in BI delivery for smoking and drinking and whether these can be explained by sociodemographic or behavioural characteristics of patients attending primary care in England.

## METHODS

### Data Sources

The Alcohol and Smoking Toolkit Studies are large, nationally representative, monthly surveys of adults aged 16+ in England [22,23]. A sample of approximately 1,700 respondents each month participate in household computer-assisted interviews. The survey uses a form of random location sampling, representing a hybrid between random probability and simple quota sampling (see published protocols for further details [22,23]). We used data collected between March 2014 and July 2016 (N=48808) with analysis restricted to respondents who reported visiting the General Practitioner (GP) in the past 12 months and were either smokers (those reporting that they had smoked cigarettes or other tobacco products at least occasionally in the past year) or risky drinkers (those scoring at least eight on the Alcohol Use Disorders Identification Test (AUDIT) [24]). This gave a total sample of 8978 adults of whom 5004 were smokers only, 2528 were risky drinkers only, and 1446 were both.

### Measures

Our primary outcome measure was self-reported receipt of a BI (or more intensive intervention) from a GP or other primary care-based health worker in the past year. Respondents who smoked were asked 'Has your GP spoken to you about smoking in the past year?' and BI receipt was

1  
2  
3 categorised as a response of at least 'Yes, he/she advised me to stop but did not offer anything'.  
4 Risky drinkers were asked 'In the last 12 months has a doctor or other health worker within your GP  
5 surgery discussed your drinking?', with BI receipt categorised as a response of at least 'Yes, a doctor  
6 or other health worker within my GP surgery offered advice about cutting down my drinking'. See  
7 supplementary material for a full list of response options.  
8

9  
10 Data was also collected on respondents' age, gender, region of England (categorised as North,  
11 Midlands or South), the number of children in the household (categorised as 0 or 1+), self-reported  
12 disability status (disability/no disability) and ethnicity (white, mixed/multiple ethnic group, Asian or  
13 British Asian, black, other). Self-reported motivation to reduce smoking and drinking was recorded  
14 and grouped into those responding 'I don't want to stop smoking/cut down on drinking', those  
15 reporting some degree of motivation to quit/cut down, and those who were highly motivated and  
16 willing to specify a time frame for cutting down – 'I really want to stop smoking and intend to in the  
17 next month/3 months').  
18

19  
20 As previous studies have identified that different measures of SES demonstrate different  
21 relationships with alcohol consumption [7,25], we examined four alternative measures of  
22 socioeconomic status (SES):

23 1) Social-grade, classified Using the British National Readership Survey Social-Grade Classification  
24 Tool [26]: A: higher managerial, administrative or professional; B: intermediate managerial,  
25 administrative or professional; C1: supervisory or clerical and junior managerial administrative or  
26 professional; C2: skilled manual workers; D: Semi and unskilled manual workers; E: Casual or lowest  
27 grade workers, pensioners and others who depend on the welfare state for their income.

28 2) Educational level, grouped as: University education, A-level and equivalent, GCSE/vocational,  
29 other/still studying, none

30 3) Working status, categorised as being in full-time employment or otherwise

31 4) Housing tenure, categorised as owner occupied (owned outright or being brought with a  
32 mortgage) or otherwise

33  
34 Finally, in order to test whether higher levels of alcohol consumption increase the likelihood of  
35 receiving a BI, the risky drinker group were further subdivided according to their AUDIT score in line  
36 with World Health Organisation guidelines [24]:

37 8-15 - Risky drinker

38 16-19 – High risk drinkers

39 20+ - Possible alcohol dependence  
40  
41

## 42 Analysis

43  
44 Data were weighted using an iterative 'rim weighting' technique as used in previous analyses of  
45 Smoking and Alcohol Toolkit data (e.g. [16]). Parallel analysis using unweighted data is reported in  
46 the supplementary material. Missingness was generally low for the variables of interest: age (1.4%),  
47 gender (0%), region (0.2%), children in the household (0%), disability (2.5%), ethnicity (0.5%),  
48 motivation to quit/cut down smoking (0.8%), motivation to cut down drinking (0.3%), social grade  
49 (0%), education (0.5%), working status (0.1%) and home ownership (1.9%). Missing data were  
50 imputed using Multiple Imputation with 20 datasets [27] and analytical results combined using  
51 Rubin's Rules [28]. Complete case only analyses are reported in the supplementary material. All  
52 imputation and analyses were undertaken using Stata 12 [29] following a plan pre-registered with  
53 the Open Science Framework prior to any data analysis (<https://osf.io/5eq4h/>). As the only  
54 continuous variable in the analysis, age was standardised and tested for non-linearity using the Box-  
55  
56  
57  
58  
59

5

1  
2  
3 Tidwell approach [30]. This suggested significant non-linearity and age was therefore categorised  
4 into six groups (18-24, 25-34, 35-44, 45-54, 55-64 and 65+).

5  
6 The analysis consisted of four steps:

7 1) we produced descriptive tables the full dataset showing rates of smoking and risky drinking (all  
8 respondents scoring AUDIT 8+) in the population and rates of GP attendance and BI receipt for those  
9 who visited their GP for both smokers and risky drinkers, stratified by the 4 socioeconomic measures  
10 to show the extent to which socioeconomic inequalities exist before adjusting for demographic and  
11 other factors.

12 2) to examine the extent to which variation in BI delivery can be explained by demographic  
13 characteristics alone, we fitted two multivariable logistic regression models in which receipt of a  
14 smoking or alcohol intervention was regressed on age, gender, region, number of children in the  
15 household, disability status and ethnicity. These models also include a linear (monthly) temporal  
16 trend to assess whether BI rates have increased or decreased over the data collection period.

17 3) to examine the extent to which drinking and smoking behaviour, and motivations to cut down can  
18 explain additional variation in BI delivery, we fitted two further multivariable models which  
19 additionally adjust for drinking status (risky versus non-risky) and motivation to stop smoking (in the  
20 smoking model) or smoking status (smoker versus non-smoker), AUDIT group and motivation to cut  
21 down drinking (in the drinking model).

22 4) to examine whether socioeconomic status can explain any remaining variation in BI delivery, we  
23 fitted fully-adjusted models in which each of the 4 measures of socioeconomic status was added  
24 separately.  
25  
26  
27

28  
29 Patients were not involved in the design of this study. STROBE guidelines were followed throughout  
30 [31].  
31

## 32 **RESULTS**

33  
34 Demographic characteristics for the 8978 smokers and risky drinkers included in the analytic sample  
35 are presented in Table 1. This shows a relatively even spread of both smokers and risky drinkers  
36 across the life course, except for the youngest age group (18-24 year olds) which has a greater  
37 concentration of risky drinkers. Smokers are more likely to be female and more likely to live with  
38 children or have a disability than risky drinkers. The other key distinction comes in terms of  
39 motivation to cut down or quit, with 72.7% of smokers reporting some motivation to reduce their  
40 smoking compared to only 39.8% of risky drinkers.  
41  
42  
43  
44  
45  
46  
47  
48  
49  
50  
51  
52  
53  
54  
55  
56  
57  
58  
59  
60

**Table 1 - Characteristics of survey respondents included in statistical models (unweighted)**

|                                               |            | <b>Past year smokers<br/>(n=6450)</b> | <b>Risky drinkers<br/>(n=3974)</b> |
|-----------------------------------------------|------------|---------------------------------------|------------------------------------|
| <b>Age, n (%)</b>                             | 18-24      | 1051 (16.2%)                          | 877 (23.2%)                        |
|                                               | 25-34      | 1222 (18.8%)                          | 539 (14.2%)                        |
|                                               | 35-44      | 1052 (16.2%)                          | 572 (15.1%)                        |
|                                               | 45-54      | 1126 (17.4%)                          | 741 (19.6%)                        |
|                                               | 55-64      | 1046 (16.1%)                          | 463 (12.2%)                        |
|                                               | 65+        | 991 (15.3%)                           | 595 (15.7%)                        |
| <b>Male, n (%)</b>                            |            | 3253 (50.4%)                          | 2600 (65.4%)                       |
| <b>Region, n (%)</b>                          | North      | 2540 (39.1%)                          | 1974 (49.7%)                       |
|                                               | Midlands   | 1730 (26.6%)                          | 716 (18.0%)                        |
|                                               | South      | 2234 (34.3%)                          | 1282 (32.3%)                       |
| <b>Children in the household, n (%)</b>       |            | 1406 (21.8%)                          | 924 (23.3%)                        |
| <b>Disability, n (%)</b>                      |            | 1275 (19.8%)                          | 494 (12.4%)                        |
| <b>Ethnicity, n (%)</b>                       | White      | 5812 (89.6%)                          | 3813 (96.3%)                       |
|                                               | Mixed race | 111 (1.7%)                            | 59 (1.5%)                          |
|                                               | Asian      | 353 (5.4%)                            | 39 (1.0%)                          |
|                                               | Black      | 147 (2.3%)                            | 39 (1.0%)                          |
|                                               | Arab/other | 61 (0.9%)                             | 10 (0.3%)                          |
| <b>Motivation to cut down smoking, n (%)</b>  | None       | 1649 (27.3%)                          |                                    |
|                                               | Moderate   | 3415 (56.5%)                          |                                    |
|                                               | High       | 978 (16.2%)                           |                                    |
| <b>Risky drinker, n (%)</b>                   |            | 1446 (22.4%)                          |                                    |
| <b>AUDIT score, n (%)</b>                     | 8-15       |                                       | 2372 (60.2%)                       |
|                                               | 16-19      |                                       | 1273 (32.3%)                       |
|                                               | 20+        |                                       | 296 (7.5%)                         |
| <b>Motivation to cut down drinking, n (%)</b> | None       |                                       | 2329 (60.2%)                       |
|                                               | Moderate   |                                       | 1247 (32.2%)                       |
|                                               | High       |                                       | 292 (7.5%)                         |
| <b>Past year smoker, n (%)</b>                |            |                                       | 1446 (36.4%)                       |

Descriptive analyses (Table 2) show that overall, smoking was more prevalent than risky drinking (20.5% vs. 13.1% of the adult population). There were also marked socioeconomic gradients in prevalence, with smoking increasingly common in lower socioeconomic groups (e.g. 35.7% of social grade E respondents compared to 11.5% in grade AB), while the gradient in risky drinking was less stark and in the opposite direction (11.3% in grade E compared to 14.3% in grade AB). These gradients were seen most clearly for social grade, although similar patterns existed for education, but were not evident when using employment for smokers and housing tenure for drinkers. There were no clear gradients for GP attendance, although risky drinkers were more likely than smokers to have visited their GP in the past year (64.8% vs. 54.9%). Unadjusted rates of BI receipt for those who had visited their GP (the sample used in the statistical analysis) suggest a socioeconomic gradient in BI delivery, with a greater proportion of respondents in lower SES groups reporting that they had received a BI for both smoking and drinking. There appears, however, to be a divergence in the shape of this gradient, with BI receipt for smokers increasing linearly as SES decreases, while the higher rates of BI receipt in risky drinkers are concentrated in the most deprived group. These patterns, for social grade, are illustrated in Figure 1.



7

**Table 2 - Descriptive analysis of prevalence, GP attendance and BI delivery rates for smokers and risky drinkers by socioeconomic status (weighted, 95% Confidence Intervals in brackets)**

|                |            | Past year smokers        |                             |                              | Risky drinkers           |                             |                              |
|----------------|------------|--------------------------|-----------------------------|------------------------------|--------------------------|-----------------------------|------------------------------|
|                |            | Prevalence in population | Who visited GP in past year | Who received BI   visited GP | Prevalence in population | Who visited GP in past year | Who received BI   visited GP |
| Population     |            | 20.5% (20.2 to 20.9)     | 54.9% (53.8 to 56)          | 48.3% (47.1 to 49.5)         | 13.1% (12.8 to 13.3)     | 64.8% (63.6 to 65.4)        | 6.1% (5.4 to 6.5)            |
| Social grade   |            |                          |                             |                              |                          |                             |                              |
|                | AB         | 11.5% (10.9 to 12.1)     | 57.7% (54.5 to 60.9)        | 45.8% (42.3 to 49.3)         | 14.3% (13.6 to 14.6)     | 67.6% (65.1 to 68.8)        | 5.4% (4 to 6.1)              |
|                | C1         | 17.8% (17.2 to 18.4)     | 55.6% (53.4 to 57.7)        | 47% (44.6 to 49.4)           | 14.3% (13.8 to 14.6)     | 65.5% (63.5 to 66.6)        | 4.8% (3.7 to 5.3)            |
|                | C2         | 24.2% (23.4 to 25.1)     | 49.7% (47.4 to 52)          | 45.7% (43.1 to 48.3)         | 13.3% (12.7 to 13.7)     | 60.8% (58 to 62.2)          | 5% (3.4 to 5.8)              |
|                | D          | 27.8% (26.8 to 28.8)     | 53.3% (50.9 to 55.8)        | 50.3% (47.6 to 53)           | 9.7% (9.1 to 10.1)       | 65.2% (61.7 to 67)          | 6.5% (4.2 to 7.6)            |
|                | E          | 35.7% (34.4 to 37)       | 62.6% (60.1 to 65.1)        | 53.9% (51.2 to 56.6)         | 11.3% (10.4 to 11.7)     | 61.6% (57.7 to 63.6)        | 18.1% (14 to 20.1)           |
| Education      |            |                          |                             |                              |                          |                             |                              |
|                | University | 12.6% (12 to 13.1)       | 53.7% (51 to 56.3)          | 44.3% (41.3 to 47.3)         | 13.6% (13 to 13.9)       | 66.4% (64.2 to 67.6)        | 4.9% (3.7 to 5.6)            |
|                | A-level    | 21% (20.1 to 21.8)       | 53.5% (50.9 to 56)          | 48% (45.2 to 50.9)           | 18.6% (17.8 to 19)       | 59.7% (57.3 to 60.9)        | 4.7% (3.4 to 5.4)            |
|                | GCSE       | 26.1% (25.4 to 26.9)     | 54.8% (53 to 56.7)          | 47.5% (45.5 to 49.6)         | 13.1% (12.5 to 13.4)     | 65.1% (62.8 to 66.2)        | 6.6% (5.1 to 7.3)            |
|                | Other      | 18.3% (17.1 to 19.5)     | 56.8% (52.7 to 60.9)        | 49.3% (44.8 to 53.8)         | 11.4% (10.4 to 11.9)     | 70.3% (65.9 to 72.5)        | 7.9% (4.8 to 9.4)            |
|                | None       | 26.6% (25.6 to 27.5)     | 57.1% (54.7 to 59.5)        | 52.6% (50.1 to 55.2)         | 6.6% (6.1 to 6.9)        | 68.8% (64.9 to 70.8)        | 11.4% (8.2 to 13)            |
| Employment     |            |                          |                             |                              |                          |                             |                              |
|                | Full time  | 21.8% (21.2 to 22.5)     | 47.4% (45.6 to 49.3)        | 46.1% (43.9 to 48.3)         | 16.7% (16.1 to 17)       | 60.2% (58.4 to 61.2)        | 4.2% (3.2 to 4.7)            |
|                | Other      | 19.7% (19.3 to 20.1)     | 60.3% (59 to 61.7)          | 49.5% (48.1 to 51)           | 10.9% (10.6 to 11.1)     | 69% (67.5 to 69.8)          | 7.6% (6.5 to 8.1)            |
| Housing tenure |            |                          |                             |                              |                          |                             |                              |
|                | Owner      | 13.6% (13.2 to 14)       | 56.3% (54.5 to 58)          | 48% (46.1 to 49.9)           | 12.3% (11.9 to 12.5)     | 67.5% (65.9 to 68.3)        | 5.2% (4.3 to 5.7)            |
|                | Renter     | 33.7% (33 to 34.4)       | 54.3% (52.8 to 55.7)        | 48.7% (47.1 to 50.2)         | 14.9% (14.4 to 15.2)     | 60.8% (58.9 to 61.7)        | 7.7% (6.4 to 8.4)            |

**INSERT FIGURE 1 ABOUT HERE**

8

### Smoking

Results for the demographic-adjusted models for receipt of smoking BI (Table 3) show that older smokers had significantly greater odds of having received a BI than 18-24 year olds (e.g. OR 2.06 95% CI 1.68-2.51 for 65+ year olds). Significant effects were also seen for region, with smokers in the South having lower odds of receiving an intervention than those in the North (OR 0.81 95% CI 0.71-0.92) and for those with a self-reported disability having greater odds of receiving one than those without (OR 1.37 95% CI 1.19-1.57). There was no significant temporal trend in BI delivery.

The addition of behavioural factors to the model (see supplementary material for full results) did not change the magnitude or significance of the demographic coefficients, but demonstrated that smokers who were also risky drinkers had lower odds of receiving a smoking BI (OR 0.84 95% CI 0.73-0.97) and that there was a strong association with both moderate (OR 1.42 95% CI 1.25-1.63) and high levels of motivation to cut down or quit smoking (OR 2.14 95% CI 1.79-2.57) and BI receipt. Finally, the addition of socioeconomic measures to the models showed significantly increased levels of BI receipt in social grades D and E compared to grade AB (OR 1.26 95% CI 1.02-1.55 and OR 1.30 95% CI 1.05-1.61 respectively). Significant increases in BI receipt were also observed in those with A-levels and no formal qualifications compared to university-level qualifications (OR 1.24 95% CI 1.02-1.51 and OR 1.24 95% CI 1.03-1.50 respectively), but no significant association employment status or housing tenure was identified.

9

**Table 3 - Logistic regression results for factors associated with likelihood of receiving Brief Intervention for smoking**

|                                |            | Demographic-adjusted model |        |              | Behavioural and Socioeconomic-adjusted models |        |              |           |        |              |           |        |              |
|--------------------------------|------------|----------------------------|--------|--------------|-----------------------------------------------|--------|--------------|-----------|--------|--------------|-----------|--------|--------------|
|                                |            | OR                         | 95% CI |              | OR                                            | 95% CI |              | OR        | 95% CI |              | OR        | 95% CI |              |
| Age                            | 18-24      | Reference                  |        |              |                                               |        |              |           |        |              |           |        |              |
|                                | 25-34      | 1.39                       | ***    | 1.16 to 1.67 | 1.38                                          | **     | 1.14 to 1.68 | 1.38      | **     | 1.14 to 1.68 | 1.37      | **     | 1.13 to 1.66 |
|                                | 35-44      | 1.57                       | ***    | 1.30 to 1.90 | 1.60                                          | ***    | 1.31 to 1.96 | 1.60      | ***    | 1.31 to 1.97 | 1.57      | ***    | 1.28 to 1.93 |
|                                | 45-54      | 2.00                       | ***    | 1.66 to 2.41 | 2.03                                          | ***    | 1.67 to 2.47 | 2.03      | ***    | 1.66 to 2.48 | 2.00      | ***    | 1.64 to 2.44 |
|                                | 55-64      | 2.19                       | ***    | 1.80 to 2.66 | 2.30                                          | ***    | 1.86 to 2.83 | 2.26      | ***    | 1.82 to 2.79 | 2.23      | ***    | 1.81 to 2.75 |
|                                | 65+        | 2.06                       | ***    | 1.68 to 2.51 | 2.22                                          | ***    | 1.79 to 2.75 | 2.14      | ***    | 1.71 to 2.67 | 2.11      | ***    | 1.70 to 2.62 |
| Gender                         | Male       | Reference                  |        |              |                                               |        |              |           |        |              |           |        |              |
|                                | Female     | 1.01                       |        | 0.91 to 1.13 | 0.95                                          |        | 0.84 to 1.07 | 0.97      |        | 0.86 to 1.09 | 0.96      |        | 0.85 to 1.08 |
| Region                         | North      | Reference                  |        |              |                                               |        |              |           |        |              |           |        |              |
|                                | Midlands   | 0.94                       |        | 0.82 to 1.08 | 0.93                                          |        | 0.81 to 1.08 | 0.93      |        | 0.80 to 1.07 | 0.93      |        | 0.81 to 1.07 |
|                                | South      | 0.81                       | **     | 0.71 to 0.92 | 0.79                                          | **     | 0.69 to 0.91 | 0.79      | ***    | 0.69 to 0.9  | 0.78      | ***    | 0.68 to 0.89 |
| Children in the household      | None       | Reference                  |        |              |                                               |        |              |           |        |              |           |        |              |
|                                | ≥1         | 1.14                       |        | 0.99 to 1.30 | 1.07                                          |        | 0.93 to 1.23 | 1.08      |        | 0.93 to 1.24 | 1.08      |        | 0.94 to 1.24 |
| Self-reported disability       | No         | Reference                  |        |              |                                               |        |              |           |        |              |           |        |              |
|                                | Yes        | 1.37                       | ***    | 1.19 to 1.57 | 1.33                                          | ***    | 1.14 to 1.55 | 1.38      | ***    | 1.19 to 1.59 | 1.38      | ***    | 1.19 to 1.60 |
| Ethnicity                      | White      | Reference                  |        |              |                                               |        |              |           |        |              |           |        |              |
|                                | Mixed race | 0.92                       |        | 0.60 to 1.39 | 0.85                                          |        | 0.54 to 1.34 | 0.87      |        | 0.56 to 1.36 | 0.87      |        | 0.56 to 1.35 |
|                                | Asian      | 0.92                       |        | 0.72 to 1.18 | 0.84                                          |        | 0.65 to 1.09 | 0.87      |        | 0.67 to 1.12 | 0.86      |        | 0.67 to 1.11 |
|                                | Black      | 1.20                       |        | 0.83 to 1.72 | 0.98                                          |        | 0.67 to 1.46 | 1.01      |        | 0.68 to 1.49 | 1.01      |        | 0.68 to 1.49 |
|                                | Arab/other | 0.95                       |        | 0.55 to 1.63 | 0.94                                          |        | 0.52 to 1.69 | 0.93      |        | 0.52 to 1.68 | 0.93      |        | 0.52 to 1.66 |
| Time trend (monthly)           |            | 1.00                       |        | 0.99 to 1.01 | 1.00                                          |        | 0.99 to 1.01 | 1.00      |        | 1.00 to 1.01 | 1.00      |        | 1.00 to 1.01 |
| Risky drinker (AUDIT 8+)       | No         |                            |        |              |                                               |        |              |           |        |              |           |        |              |
|                                | Yes        |                            |        |              | 0.86                                          | *      | 0.75 to 0.99 | 0.85      | *      | 0.74 to 0.98 | 0.85      | *      | 0.73 to 0.97 |
| Motivation to cut down smoking | None       |                            |        |              |                                               |        |              |           |        |              |           |        |              |
|                                | Moderate   |                            |        |              | 1.44                                          | ***    | 1.26 to 1.64 | 1.44      | ***    | 1.26 to 1.64 | 1.43      | ***    | 1.25 to 1.63 |
|                                | High       |                            |        |              | 2.19                                          | ***    | 1.83 to 2.63 | 2.16      | ***    | 1.80 to 2.59 | 2.15      | ***    | 1.79 to 2.58 |
| Social grade                   | AB         | Reference                  |        |              |                                               |        |              |           |        |              |           |        |              |
|                                | C1         |                            |        |              | 1.08                                          |        | 0.88 to 1.32 |           |        |              |           |        |              |
|                                | C2         |                            |        |              | 0.96                                          |        | 0.78 to 1.17 |           |        |              |           |        |              |
|                                | D          |                            |        |              | 1.26                                          | *      | 1.02 to 1.55 |           |        |              |           |        |              |
|                                | E          |                            |        |              | 1.30                                          | *      | 1.05 to 1.61 |           |        |              |           |        |              |
| Education                      | University |                            |        |              |                                               |        |              | Reference |        |              |           |        |              |
|                                | A-level    |                            |        |              |                                               |        |              | 1.24      | *      | 1.02 to 1.51 |           |        |              |
|                                | GCSE       |                            |        |              |                                               |        |              | 1.16      |        | 0.98 to 1.38 |           |        |              |
|                                | Other      |                            |        |              |                                               |        |              | 1.20      |        | 0.93 to 1.56 |           |        |              |
| Employment status              | None       |                            |        |              |                                               |        |              | 1.24      | *      | 1.03 to 1.5  |           |        |              |
|                                | Full-time  |                            |        |              |                                               |        |              |           |        |              | Reference |        |              |
|                                | Other      |                            |        |              |                                               |        |              |           |        |              | 1.05      |        | 0.92 to 1.2  |
| Housing tenure                 | Owned      |                            |        |              |                                               |        |              |           |        |              | Reference |        |              |

10

|          |      |              |      |    |              |      |    |              |      |   |              |      |              |      |    |              |
|----------|------|--------------|------|----|--------------|------|----|--------------|------|---|--------------|------|--------------|------|----|--------------|
| Constant | 0.49 | 0.24 to 1.02 | 0.34 | ** | 0.15 to 0.75 | 0.31 | ** | 0.14 to 0.69 | 0.36 | * | 0.17 to 0.78 | 1.10 | 0.97 to 1.25 | 0.35 | ** | 0.16 to 0.76 |
|----------|------|--------------|------|----|--------------|------|----|--------------|------|---|--------------|------|--------------|------|----|--------------|

For peer review only

### Risky drinking

Results for the demographic-adjusted logistic regression models for alcohol BIs (Table 4) showed a similar age gradient to the smoking models, with all risky drinkers aged 35+ having odds at least twice as high of having received a BI as those under 24 (e.g. OR 2.68 95% CI 1.53-4.71 for 65+ year olds). Unlike for smoking, there was a significant gender effect, with women having lower odds of receiving an intervention (OR 0.68 95% CI 0.49-0.93). There were no significant effects for region, or time, but again, disability was a significant predictor of BI receipt (OR 3.47 95% CI 2.54-4.74).

The addition of behavioural factors to the model (see supplementary material for full results) substantially increased the slope of the age gradient, with the OR for over 65s compared to 18-24 year-olds increasing to 5.00 (95% CI 2.71-9.23). The effect of disability was reduced, although still significant (OR 2.27 95% CI 1.57-3.27) and we saw an additional significant effect for Arab/other ethnic groups compared to the White group (OR 8.64 95% CI 1.81-41.21). Of the additional explanatory factors, smoking did not significantly predict BI receipt for alcohol, but motivation to reduce drinking did, with both moderate (OR 2.85 95% CI 2.00-4.05) and high levels (OR 5.17 95% CI 3.29-8.14) significantly associated with BI receipt. Level of alcohol use was also a very strong predictor of BI receipt, with high risk drinkers having almost 3 times the odds of having received a BI (OR 2.94 95% CI 1.81-4.79) and potentially dependent drinkers almost 12 times the odds (OR 11.84 95% CI 7.77-18.04).

Adding socioeconomic factors to the model did not further change the magnitude or significance of the other coefficients, but we saw a significant increase in BI receipt for the lowest social grade (E) compared to the highest (OR 2.11 95% CI 1.27-3.52). There was no significant effect of education, but not being in full-time employment (OR 1.56 95% CI 1.08-2.25) and not being a homeowner (OR 1.55 95% CI 1.09-2.20) significantly increased the likelihood of receiving a BI. The effects of all four socioeconomic measures on both smoking and alcohol BI receipt are illustrated in Figure 2, highlighting the relatively larger scale of the socioeconomic gradients for alcohol compared to smoking.

12

**Table 4 - Logistic regression results for factors associated with likelihood of receiving Brief Intervention for risky drinking**

|                                 |            | Demographic-adjusted model |                  | Behavioural and Socioeconomic-adjusted models |                  |      |                  |      |                  |      |                  |  |  |
|---------------------------------|------------|----------------------------|------------------|-----------------------------------------------|------------------|------|------------------|------|------------------|------|------------------|--|--|
|                                 |            | OR                         | 95% CI           | OR                                            | 95% CI           | OR   | 95% CI           | OR   | 95% CI           | OR   | 95% CI           |  |  |
| Age                             | 18-24      | Reference                  |                  |                                               |                  |      |                  |      |                  |      |                  |  |  |
|                                 | 25-34      | 1.56                       | 0.84 to 2.89     | 1.46                                          | 0.77 to 2.78     | 1.46 | 0.76 to 2.80     | 1.60 | 0.82 to 3.14     | 1.51 | 0.79 to 2.85     |  |  |
|                                 | 35-44      | 2.49                       | ** 1.39 to 4.47  | 2.05                                          | * 1.09 to 3.86   | 2.14 | * 1.13 to 4.07   | 2.42 | ** 1.26 to 4.64  | 2.32 | ** 1.23 to 4.36  |  |  |
|                                 | 45-54      | 2.74                       | *** 1.63 to 4.62 | 2.86                                          | *** 1.62 to 5.07 | 2.98 | *** 1.65 to 5.39 | 3.33 | *** 1.86 to 5.97 | 3.43 | *** 1.95 to 6.01 |  |  |
|                                 | 55-64      | 2.26                       | ** 1.30 to 3.93  | 3.23                                          | *** 1.76 to 5.92 | 3.20 | *** 1.71 to 5.99 | 3.24 | *** 1.77 to 5.93 | 3.93 | *** 2.11 to 7.33 |  |  |
|                                 | 65+        | 2.68                       | ** 1.53 to 4.71  | 4.94                                          | *** 2.66 to 9.15 | 4.74 | *** 2.50 to 9.02 | 4.41 | *** 2.41 to 8.08 | 6.11 | *** 3.25 to 11.5 |  |  |
| Gender                          | Male       | Reference                  |                  |                                               |                  |      |                  |      |                  |      |                  |  |  |
|                                 | Female     | 0.68                       | * 0.49 to 0.93   | 0.62                                          | ** 0.43 to 0.89  | 0.65 | * 0.45 to 0.92   | 0.60 | ** 0.42 to 0.85  | 0.64 | * 0.45 to 0.91   |  |  |
| Region                          | North      | Reference                  |                  |                                               |                  |      |                  |      |                  |      |                  |  |  |
|                                 | Midlands   | 1.21                       | 0.84 to 1.73     | 1.20                                          | 0.81 to 1.77     | 1.18 | 0.80 to 1.75     | 1.19 | 0.80 to 1.77     | 1.20 | 0.81 to 1.78     |  |  |
|                                 | South      | 0.85                       | 0.62 to 1.16     | 0.84                                          | 0.58 to 1.20     | 0.83 | 0.58 to 1.18     | 0.78 | 0.55 to 1.11     | 0.80 | 0.56 to 1.15     |  |  |
| Children in the household       | None       | Reference                  |                  |                                               |                  |      |                  |      |                  |      |                  |  |  |
|                                 | ≥1         | 0.79                       | 0.53 to 1.17     | 1.06                                          | 0.69 to 1.64     | 1.06 | 0.69 to 1.62     | 1.06 | 0.69 to 1.64     | 1.08 | 0.70 to 1.65     |  |  |
| Self-reported disability        | No         | Reference                  |                  |                                               |                  |      |                  |      |                  |      |                  |  |  |
|                                 | Yes        | 3.47                       | *** 2.54 to 4.74 | 1.97                                          | ** 1.34 to 2.90  | 2.16 | *** 1.49 to 3.14 | 2.09 | *** 1.42 to 3.06 | 2.09 | *** 1.43 to 3.04 |  |  |
| Ethnicity                       | White      | Reference                  |                  |                                               |                  |      |                  |      |                  |      |                  |  |  |
|                                 | Mixed race | 2.20                       | 0.73 to 6.60     | 2.29                                          | 0.72 to 7.32     | 2.14 | 0.68 to 6.71     | 2.17 | 0.72 to 6.52     | 2.09 | 0.71 to 6.17     |  |  |
|                                 | Asian      | 3.44                       | 0.98 to 12.0     | 3.18                                          | 0.66 to 15.4     | 3.47 | 0.69 to 17.4     | 3.47 | 0.70 to 17.2     | 3.17 | 0.65 to 15.5     |  |  |
|                                 | Black      | 0.35                       | 0.07 to 1.86     | 0.17                                          | 0.02 to 1.31     | 0.19 | 0.02 to 1.63     | 0.17 | 0.02 to 1.54     | 0.18 | 0.02 to 1.51     |  |  |
|                                 | Arab/other | 4.41                       | 0.95 to 20.4     | 9.58                                          | ** 1.98 to 46.4  | 8.29 | ** 1.70 to 40.4  | 8.02 | * 1.51 to 42.5   | 8.78 | ** 1.77 to 43.5  |  |  |
| Time trend (monthly)            |            | 1.00                       | 0.99 to 1.02     | 1.00                                          | 0.98 to 1.02     | 1.00 | 0.98 to 1.02     | 1.00 | 0.98 to 1.02     | 1.00 | 0.98 to 1.02     |  |  |
| Past year smoker                | No         | Reference                  |                  |                                               |                  |      |                  |      |                  |      |                  |  |  |
|                                 | Yes        |                            |                  | 1.09                                          | 0.79 to 1.52     | 1.17 | 0.84 to 1.62     | 1.16 | 0.84 to 1.62     | 1.07 | 0.77 to 1.49     |  |  |
| Motivation to cut down drinking | None       | Reference                  |                  |                                               |                  |      |                  |      |                  |      |                  |  |  |
|                                 | Moderate   |                            |                  | 2.94                                          | *** 2.06 to 4.20 | 2.91 | *** 2.03 to 4.17 | 2.85 | *** 2.00 to 4.06 | 2.93 | *** 2.06 to 4.18 |  |  |
|                                 | High       |                            |                  | 5.26                                          | *** 3.33 to 8.30 | 5.27 | *** 3.34 to 8.32 | 5.01 | *** 3.18 to 7.90 | 5.18 | *** 3.29 to 8.14 |  |  |
| AUDIT Score                     | 8-15       | Reference                  |                  |                                               |                  |      |                  |      |                  |      |                  |  |  |
|                                 | 16-19      |                            |                  | 2.77                                          | *** 1.68 to 4.56 | 2.81 | *** 1.72 to 4.59 | 2.88 | *** 1.76 to 4.73 | 2.86 | *** 1.75 to 4.69 |  |  |
|                                 | 20+        |                            |                  | 10.9                                          | *** 7.12 to 16.6 | 11.7 | *** 7.67 to 17.7 | 11.5 | *** 7.54 to 17.6 | 11.4 | *** 7.47 to 17.5 |  |  |
| Social grade                    | AB         | Reference                  |                  |                                               |                  |      |                  |      |                  |      |                  |  |  |
|                                 | C1         |                            |                  | 0.97                                          | 0.63 to 1.49     |      |                  |      |                  |      |                  |  |  |
|                                 | C2         |                            |                  | 0.84                                          | 0.51 to 1.36     |      |                  |      |                  |      |                  |  |  |
|                                 | D          |                            |                  | 1.20                                          | 0.68 to 2.10     |      |                  |      |                  |      |                  |  |  |
|                                 | E          |                            |                  | 2.11                                          | ** 1.27 to 3.52  |      |                  |      |                  |      |                  |  |  |
| Education                       | University | Reference                  |                  |                                               |                  |      |                  |      |                  |      |                  |  |  |
|                                 | A-level    |                            |                  |                                               |                  | 1.10 | 0.68 to 1.79     |      |                  |      |                  |  |  |
|                                 | GCSE       |                            |                  |                                               |                  | 1.12 | 0.73 to 1.71     |      |                  |      |                  |  |  |
|                                 | Other      |                            |                  |                                               |                  | 1.48 | 0.80 to 2.72     |      |                  |      |                  |  |  |
|                                 | None       |                            |                  |                                               |                  | 1.45 | 0.86 to 2.44     |      |                  |      |                  |  |  |
| Employment status               | Full-time  | Reference                  |                  |                                               |                  |      |                  |      |                  |      |                  |  |  |
|                                 | Other      |                            |                  |                                               |                  | 1.56 | * 1.08 to 2.25   |      |                  |      |                  |  |  |
| Housing tenure                  | Owned      | Reference                  |                  |                                               |                  |      |                  |      |                  |      |                  |  |  |
|                                 | Rented     |                            |                  |                                               |                  |      |                  |      |                  | 1.55 | * 1.09 to 2.20   |  |  |

1  
2  
3  
4  
5  
6  
7  
8  
9  
10  
11  
12  
13  
14  
15  
16  
17  
18  
19  
20  
21  
22  
23  
24  
25  
26  
27  
28  
29  
30  
31  
32  
33  
34  
35  
36  
37  
38  
39  
40  
41  
42  
43  
44  
45  
46  
47

13

|          |      |    |              |      |     |              |      |     |              |      |     |              |      |     |              |
|----------|------|----|--------------|------|-----|--------------|------|-----|--------------|------|-----|--------------|------|-----|--------------|
| Constant | 0.04 | ** | 0.01 to 0.27 | 0.01 | *** | 0.00 to 0.08 | 0.01 | *** | 0.00 to 0.07 | 0.01 | *** | 0.00 to 0.07 | 0.01 | *** | 0.00 to 0.06 |
|----------|------|----|--------------|------|-----|--------------|------|-----|--------------|------|-----|--------------|------|-----|--------------|

**INSERT FIGURE 2 ABOUT HERE**

For peer review only

## DISCUSSION

Our findings show that there is a socioeconomic gradient in BI delivery for both smokers and risky drinkers, with those in the lowest socioeconomic groups more likely to receive an intervention. This gradient is not accounted for by differences in demographic characteristics or smoking and drinking behaviour and appears to be stronger for alcohol than for smoking. The analysis also illustrates that, despite clinical guidelines recommending BI for both smokers and risky drinkers, an individual who has attended primary care in the past year is 8 times more likely to report receiving an intervention if they are a smoker compared to a risky drinker. For both smoking and drinking there is a clear age gradient, with greater levels of BI delivery in older age groups, in spite of the fact that the highest rates of prevalence of risky drinking being in the youngest age group. Perhaps surprisingly, smokers who were also risky drinkers were less likely to have received a BI for their smoking than those who were not. The very heaviest drinkers, consuming at potentially dependent levels, are almost 12 times more likely to have received an alcohol intervention than those drinking at lower, but still risky, levels. These findings were robust to alternative data assumptions (see supplementary material).

Our study represents, to the best of our knowledge, the first detailed exploration of the potential of BIs for both smoking and alcohol to reduce, or increase, inequalities in health. We used data from a large, nationally representative survey and our findings are based on patients' own reporting of having received an intervention. Whilst such a measure may be subject to recall bias, it likely provides a better indicator of patient experience than routine data recorded by practitioners [32] and is not subject to known biases in practitioner recording [33]. We explored multiple measures of socioeconomic status, finding similar results across all measures, although the effect of increased BI delivery appears more closely associated with low social grade than low levels of education.

There are several important limitations to our study which should be considered alongside our findings. Firstly, our definition of what constitutes a BI is fairly broad, including anyone who reported receiving advice from a primary care practitioner and that there may be unobserved inequalities in the extent to which different groups receive different intensities of intervention or in the quality of content or delivery of the BI. Secondly, patient characteristics, including drinking/smoking status and motivation to cut down or quit, are recorded after the BI has taken place. As a result, we cannot establish whether the strong association between motivation and likelihood of BI receipt is a function of treatment-seeking behaviour in patients who are already motivated to reduce their smoking or drinking, of motivation increasing after receipt of a BI, or of more motivated patients being more likely to recall having received an intervention. Finally, whilst smoking rates in the Toolkit data are very similar to those reported in other national surveys [34], the observed prevalence of risky drinking of 13.1% is substantially lower than other estimates (e.g. 19.7% in the 2014 Adult Psychiatric Morbidity Survey [35]), although it is unclear what effect, if any, this may have on the study results.

Two, much smaller, UK studies previously looked at the relationship between occupation and rates of alcohol BI receipt in risky drinkers, finding no clear socioeconomic gradient [36,37]. Another, Finnish study also found no significant association [38]. Previous studies have found similar disparities to those we find between delivery rates of BI for smoking and risky drinking [15,39], as well as similarly higher levels of BI receipt among primary care patients at older ages [40], with greater motivation to quit or cut down [41] and for risky drinkers with higher AUDIT scores [42].

Our analysis focuses on the receipt of Brief Interventions for patients who reported attending Primary Care in the past year. There are likely to be additional socioeconomic gradients in terms of access to, use of and quality of Primary Care services which will moderate any overall impact of BIs on health inequalities [43–46]. We should also consider the potential for differential effectiveness of the intervention across socioeconomic groups. If BIs are more effective at changing the behaviour of those in higher SES groups than this may mitigate any potential



1  
2  
3 inequality-reducing effects. There is little evidence to support the existence of such a gradient in effectiveness for  
4 alcohol [47], although there is some suggestion that this may be in part because lower SES groups are more likely  
5 to drop out of BI trials [48]. For smoking, a recent study does suggest there may be some degree of inequality in  
6 longer term outcomes for smoking cessation interventions [49]. A holistic view of the full impact of SBI  
7 programmes should consider the impact of these potential SES gradients, which may attenuate the positive  
8 gradients identified in the present study, alongside existing negative gradients in alcohol- and tobacco-related  
9 harm. Such is the severity of these gradients in harm, with those in the lowest SES groups experiencing rates of  
10 harm several times greater than those in the highest groups even after adjusting for drinking and smoking  
11 behaviour [6,50], that an intervention could have a negative SES gradient in terms of its effects on alcohol  
12 consumption and/or smoking, while still reducing overall inequalities. Further research in this area is urgently  
13 needed to understand the full impact that BI programmes may be having on socioeconomic inequalities. This  
14 need is particularly acute given NHS England's recent decision to incentivise secondary care providers to deliver  
15 large scale Brief Intervention programmes under the latest Commissioning for Quality and Innovation (CQUIN)  
16 scheme.  
17  
18

19  
20 These findings provide the first evidence that Brief Intervention programmes may help reduce inequalities in  
21 smoking- and alcohol-related health although better evidence is needed on the extent to which conflicting  
22 socioeconomic gradients in delivery and, potentially, intervention effectiveness interact with existing gradients in  
23 health. There is considerable scope for the potential effect on inequalities to be increased if intervention rates  
24 can be raised, particularly for drinking.  
25

#### 26 **Author Contributions**

27  
28 CA conceived of and designed the study with input from all authors. CA performed the analysis and wrote the first  
29 draft of the paper. All authors commented on this and subsequent versions and read and approved the final  
30 manuscript.  
31

#### 32 **Funding**

33  
34 This work was supported by a research innovation grant from Alcohol Research UK (R2016/01). The ATS is funded  
35 by the National Institute for Health Research (NIHR)'s School for Public Health Research (SPHR). The views are  
36 those of the author(s) and not necessarily those of the NHS, the NIHR or the Department of Health. SPHR is a  
37 partnership between the Universities of Sheffield; Bristol; Cambridge; Exeter; UCL; The London School for Hygiene  
38 and Tropical Medicine; the LiLaC collaboration between the Universities of Liverpool and Lancaster and Fuse; The  
39 Centre for Translational Research in Public Health, a collaboration between Newcastle, Durham, Northumbria,  
40 Sunderland and Teesside Universities. The Smoking Toolkit Study is currently primarily funded by Cancer Research  
41 UK (C1417/A14135; C36048/A11654; C44576/A19501), and has previously also been funded by Pfizer,  
42 GlaxoSmithKline and the Department of Health. JB's post is funded by a fellowship from the Society for the Study  
43 of Addiction, and Cancer Research UK also provide support (C1417/A14135).  
44  
45

#### 46 **Disclaimer**

47  
48 The views are those of the author(s) and not necessarily those of the NHS, NIHR or the Department of Health  
49

#### 50 **Declaration of Interests**

51  
52 CA, EB and PB's salaries are funded or part-funded by the National Institute for Health Research (NIHR)'s School  
53 for Public Health Research (SPHR) and all have received funding from Cancer Research UK (CRUK); EK is a senior  
54 investigator in SPHR. JB is funded by CRUK and the Society for the Study of Addiction; SM is funded by CRUK. CA  
55 has received funding related to commissioned research from Systembolaget, the Swedish government-owned  
56  
57  
58  
59

16

1  
2  
3 alcohol retail monopoly. JB and EB have both received unrestricted research funding from Pfizer relating to  
4 smoking cessation studies.  
5

6 **Data sharing statement**

7 The dataset analysed during the current study are available from the corresponding author on reasonable request.  
8  
9  
10  
11  
12  
13  
14  
15  
16  
17  
18  
19  
20  
21  
22  
23  
24  
25  
26  
27  
28  
29  
30  
31  
32  
33  
34  
35  
36  
37  
38  
39  
40  
41  
42  
43  
44  
45  
46  
47  
48  
49  
50  
51  
52  
53  
54  
55  
56  
57  
58  
59  
60

17

## REFERENCES

- 1 Forouzanfar MH, Afshin A, Alexander LT, *et al.* Global, regional, and national comparative risk assessment of 79 behavioural, environmental and occupational, and metabolic risks or clusters of risks, 1990–2015: a systematic analysis for the Global Burden of Disease Study 2015. *Lancet* 2016;**388**:1659–724. doi:10.1016/S0140-6736(16)31679-8
- 2 Siegler V, Al-Hamad A, B J, *et al.* Social inequalities in alcohol-related adult mortality by National Statistics Socio-economic Classifications, England and Wales 2001-03. *Heal Stat Q* 2011;**50**.<http://www.ons.gov.uk/ons/rel/hsq/health-statistics-quarterly/no--50--summer-2011/social-inequalities-in-alcohol-related-adult-mortality-by-national-statistics-socio-economic-classification--england-and-wales--2001-03.pdf>
- 3 Marmot M. Fair society, healthy lives, the Marmot review. 2010. <http://www.instituteofhealthequity.org/projects/fair-society-healthy-lives-the-marmot-review>
- 4 Hiscock R, Bauld L, Amos A, *et al.* Socioeconomic status and smoking: a review. *Ann N Y Acad Sci* 2012;**1248**:107–23. doi:10.1111/j.1749-6632.2011.06202.x
- 5 Bellis MA, Hughes K, Nicholls J, *et al.* The alcohol harm paradox: using a national survey to explore how alcohol may disproportionately impact health in deprived individuals. *BMC Public Health* 2016;**16**:111. doi:10.1186/s12889-016-2766-x
- 6 Katikireddi SV, Whitley E, Lewsey J, *et al.* Socioeconomic status as an effect modifier of alcohol consumption and harm: analysis of linked cohort data. *Lancet Public Heal* Published Online First: May 2017. doi:10.1016/S2468-2667(17)30078-6
- 7 Beard E, Brown J, West R, *et al.* Deconstructing the Alcohol Harm Paradox: A population based survey of adults in England. *PLoS One* 2016;**11**:e0160666. doi:10.1371/journal.pone.0160666
- 8 Stead L, Bergson G, Lancaster T. Physician advice for smoking cessation. *Cochrane Libr* Published Online First: 2008.<http://onlinelibrary.wiley.com/doi/10.1002/14651858.CD000165.pub3/full>
- 9 Aveyard P, Begh R, Parsons A, *et al.* Brief opportunistic smoking cessation interventions: a systematic review and meta-analysis to compare advice to quit and offer of assistance. *Addiction* Published Online First: 2012.<http://onlinelibrary.wiley.com/doi/10.1111/j.1360-0443.2011.03770.x/full>
- 10 Kaner EF, Beyer FR, Muirhead C, *et al.* Effectiveness of brief alcohol interventions in primary care populations. *Cochrane Database Syst Rev* Published Online First: 24 February 2018. doi:10.1002/14651858.CD004148.pub4
- 11 Angus C, Latimer N, Preston L, *et al.* What are the implications for policy makers? A systematic review of the cost-effectiveness of screening and brief interventions for alcohol misuse in primary care. *Front Psychiatry* 2014;**5**. doi:10.3389/fpsy.2014.00114
- 12 National Institute of Health and Clinical Excellence (NICE). Smoking: brief interventions and referrals NICE guidelines [PH1]. 2006.<https://www.nice.org.uk/guidance/ph1>
- 13 National Institute of Health and Clinical Excellence (NICE). PH24 Alcohol-use disorders: preventing harmful drinking. 2010. [www.nice.org.uk/guidance/ph24](http://www.nice.org.uk/guidance/ph24)
- 14 Department of Health, Public Health England. NHS health check programme: best practice guidance. London: 2013. <http://www.healthcheck.nhs.uk/document.php?o=456>
- 15 Taggar JS, Coleman T, Lewis S, *et al.* The impact of the Quality and Outcomes Framework (QOF) on the recording of smoking targets in primary care medical records: cross-sectional analyses from The Health Improvement Network (THIN) database. *BMC Public Health* 2012;**12**:329. doi:10.1186/1471-2458-12-329
- 16 Brown J, West R, Angus C, *et al.* Comparison of brief interventions in primary care on smoking and excessive alcohol consumption: a population survey in England. *Br J Gen Pract* 2016;**66**:e1-9. doi:10.3399/bjgp16X683149
- 17 Anderson P, Bendtsen P, Spak F, *et al.* Improving the delivery of brief interventions for heavy drinking in primary health care: outcome results of the Optimizing Delivery of Health Care Intervention (ODHIN) five-country cluster randomized factorial trial. *Addiction* Published Online First: 2016. doi:10.1111/add.13476
- 18 Denny CH, Hungerford DW, McKnight-Eily LR, *et al.* Self-Reported Prevalence of Alcohol Screening Among U.S. Adults. *Am J Prev Med* 2016;**50**:380–3. doi:10.1016/j.amepre.2015.09.016
- 19 Rehm J, Allamani A, Della Vedova R, *et al.* General practitioners recognizing alcohol dependence: a large

18

- 1  
2  
3 cross-sectional study in 6 European countries. *Ann Fam Med* 2015;**13**:28–32. doi:10.1370/afm.1742
- 4 20 Lorenc T, Petticrew M, Welch V, *et al*. What types of interventions generate inequalities? Evidence from  
5 systematic reviews. *J Epidemiol Community Health* 2013;**67**:190–3. doi:10.1136/jech-2012-201257
- 6 21 White M, Heywood P. How and why do interventions that increase health overall widen inequalities within  
7 populations? In: Babones S, ed. *Health, Inequality and society*. Bristol: : Policy Press 2009.
- 8 22 Beard E, Brown J, West R, *et al*. Protocol for a national monthly survey of alcohol use in England with 6-  
9 month follow-up: 'The Alcohol Toolkit Study'. *BMC public* Published Online First:  
10 2015. <http://bmcpublihealth.biomedcentral.com/articles/10.1186/s12889-015-1542-7>
- 11 23 Fidler J, Shahab L, West O. 'The smoking toolkit study': a national study of smoking and smoking cessation  
12 in England. *BMC Public* Published Online First:  
13 2011. <http://bmcpublihealth.biomedcentral.com/articles/10.1186/1471-2458-11-479>
- 14 24 Babor TF, Higgins-Biddle JC, Saunders JB, *et al*. *The Alcohol Use Disorders Identification Test Guidelines for*  
15 *Use in Primary Care*. World Health Organization 2001. doi:10.1177/0269881110393051
- 16 25 Lewer D, Meier P, Beard E, *et al*. Unravelling the alcohol harm paradox: a population-based study of social  
17 gradients across very heavy drinking thresholds. *BMC Public Health* 2016;**16**:599. doi:10.1186/s12889-016-  
18 3265-9
- 19 26 Collis D. Social grade: A classification tool - Bite sized thought piece. 2009. [https://www.ipsos-](https://www.ipsos-mori.com/DownloadPublication/1285_MediaCT_thoughtpiece_Social_Grade_July09_V3_WEB.pdf)  
20 [mori.com/DownloadPublication/1285\\_MediaCT\\_thoughtpiece\\_Social\\_Grade\\_July09\\_V3\\_WEB.pdf](https://www.ipsos-mori.com/DownloadPublication/1285_MediaCT_thoughtpiece_Social_Grade_July09_V3_WEB.pdf)
- 21 27 Graham JW, Olchowski AE, Gilreath TD. How many imputations are really needed? Some practical  
22 clarifications of multiple imputation theory. *Prev Sci* 2007;**8**:206–13. doi:10.1007/s11121-007-0070-9
- 23 28 Rubin DB. Multiple Imputation after 18+ Years. *J Am Stat Assoc* 1996;**91**:473–89.  
24 doi:10.1080/01621459.1996.10476908
- 25 29 StataCorp. Stata Statistical Software: Release 12. 2011.
- 26 30 Box GEP, Tidwell PW. Transformation of the Independent Variables. *Technometrics* 1962;**4**:531.  
27 doi:10.2307/1266288
- 28 31 von Elm E, Altman DG, Egger M, *et al*. Strengthening the Reporting of Observational Studies in  
29 Epidemiology (STROBE) statement: guidelines for reporting observational studies. *BMJ* 2007;**335**:806–8.  
30 doi:10.1136/bmj.39335.541782.AD
- 31 32 Wilson A, McDonald P. Comparison of patient questionnaire, medical record, and audio tape in  
32 assessment of health promotion in general practice consultations. *BMJ* 1994;**309**:1483–  
33 5. <http://www.ncbi.nlm.nih.gov/pubmed/7804055> (accessed 21 Nov 2016).
- 34 33 Szatkowski L, Mcneill A, Lewis S, *et al*. A comparison of patient recall of smoking cessation advice with  
35 advice recorded in electronic medical records. doi:10.1186/1471-2458-11-291
- 36 34 Health and Social Care Information Centre. Health Survey for England 2014. 2015.
- 37 35 Office for National Statistics. Adult Psychiatric Morbidity Survey 2014. 2016.
- 38 36 Kaner EF, Heather N, Brodie J, *et al*. Patient and practitioner characteristics predict brief alcohol  
39 intervention in primary care. *Br J Gen Pract* 2001;**51**:822–  
40 7. <http://www.ncbi.nlm.nih.gov/pubmed/11677706> (accessed 17 Nov 2016).
- 41 37 Lock CA, Kaner EFS. Implementation of brief alcohol interventions by nurses in primary care: do non-  
42 clinical factors influence practice? *Fam Pract* 2004;**21**:270–5. doi:10.1093/FAMPRA/CMH310
- 43 38 Mäkelä P, Havio M, Seppä K. Alcohol-related discussions in health care—a population view. *Addiction*  
44 2011;**106**:1239–48. doi:10.1111/j.1360-0443.2010.03356.x
- 45 39 Khadjesari Z, Marston L, Petersen I, *et al*. Alcohol consumption screening of newly-registered patients in  
46 primary care: a cross-sectional analysis. *Br J Gen Pract* 2013;**63**:e706-12. doi:10.3399/bjgp13X673720
- 47 40 Denny CH, Serdula MK, Holtzman D, *et al*. Physician advice about smoking and drinking: Are U.S. adults  
48 being informed? *Am J Prev Med* 2003;**24**:71–4. doi:10.1016/S0749-3797(02)00568-8
- 49 41 Kotz D, Fidler J, West R. Factors associated with the use of aids to cessation in English smokers. *Addiction*  
50 2009;**104**:1403–10. doi:10.1111/j.1360-0443.2009.02639.x
- 51 42 Cheeta S, Drummond C, Oyefeso A, *et al*. Low identification of alcohol use disorders in general practice in  
52 England. *Addiction* 2008;**103**:766–73. doi:10.1111/j.1360-0443.2008.02198.x
- 53 43 McLean G, Sutton M, Guthrie B. Deprivation and quality of primary care services: evidence for persistence  
54  
55  
56  
57  
58  
59  
60

19

- 1  
2  
3 of the inverse care law from the UK Quality and Outcomes Framework. *J Epidemiol Community Health*  
4 2006;**60**:917–22. doi:10.1136/jech.2005.044628
- 5 44 Ellis DA, McQueenie R, McConnachie A, *et al.* Demographic and practice factors predicting repeated non-  
6 attendance in primary care: a national retrospective cohort analysis. *Lancet Public Heal* 2017;**2**:e551–9.  
7 doi:10.1016/S2468-2667(17)30217-7
- 8 45 Gulliford MC. Availability of primary care doctors and population health in England: is there an association?  
9 *J Public Health Med* 2002;**24**:252–4. doi:10.1093/PUBMED/24.4.252
- 10 46 Watt G. The inverse care law today. *Lancet* Published Online First:  
11 2002.<http://www.thelancet.com/pdfs/journals/lancet/PIIS0140673602094667.pdf> (accessed 22 Nov 2016).
- 12 47 Littlejohn C. Does socio-economic status influence the acceptability of, attendance for, and outcome of,  
13 screening and brief interventions for alcohol misuse: a review. *Alcohol Alcohol*. 2006;**41**:540–  
14 5.<http://ovidsp.ovid.com/ovidweb.cgi?T=JS&PAGE=reference&D=med4&NEWS=N&AN=16855002>
- 15 48 Edwards AGK, Rollnick S. Outcome studies of brief alcohol intervention in general practice: The problem of  
16 lost subjects. *Addiction* 1997;**92**:1699–704. doi:10.1111/j.1360-0443.1997.tb02890.x
- 17 49 Bauld L, Hiscock R, Dobbie F, *et al.* English Stop-Smoking Services: One-Year Outcomes. *Int J Environ Res*  
18 *Public Health* 2016;**13**:1175. doi:10.3390/ijerph13121175
- 19 50 Hiscock R, Bauld L, Amos A, *et al.* Socioeconomic status and smoking: a review. *Ann N Y Acad Sci*  
20 2012;**1248**:107–23. doi:10.1111/j.1749-6632.2011.06202.x
- 21  
22  
23

#### 24 **FIGURE LEGENDS**

25  
26 **Figure 1 - Unadjusted socioeconomic gradients in prevalence, GP attendance and BI receipt for smokers and**  
27 **risky drinkers**

28  
29  
30 **Figure 2 - Independent, fully-adjusted, association of socioeconomic status with Odds Ratio of receiving a Brief**  
31 **Intervention for smoking or risky drinking**

32  
33  
34  
35  
36  
37  
38  
39  
40  
41  
42  
43  
44  
45  
46  
47  
48  
49  
50  
51  
52  
53  
54  
55  
56  
57  
58  
59  
60

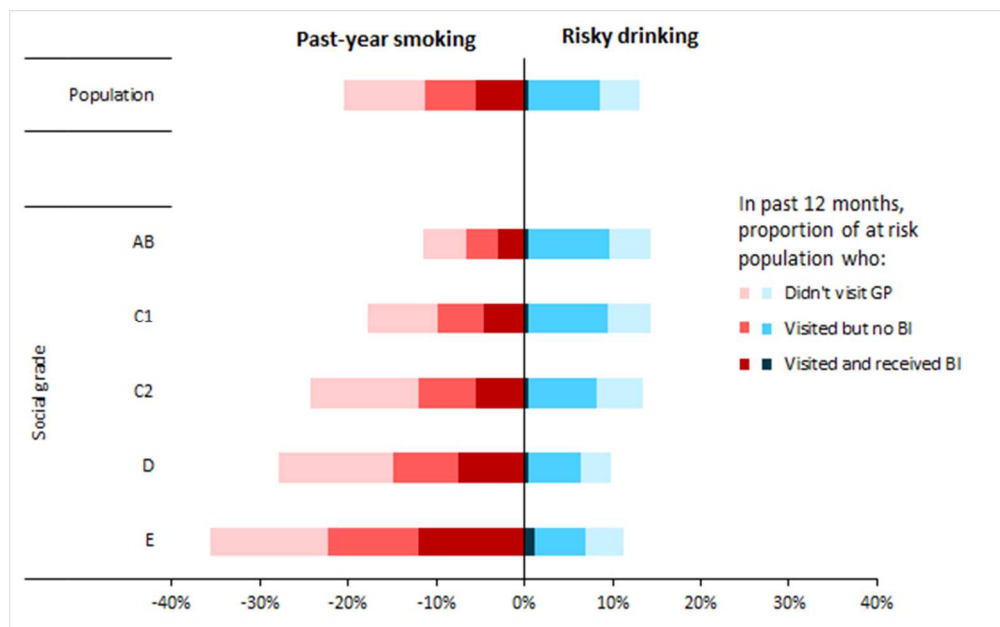

Figure 1 - Unadjusted socioeconomic gradients in prevalence, GP attendance and BI receipt for smokers and risky drinkers

166x103mm (96 x 96 DPI)

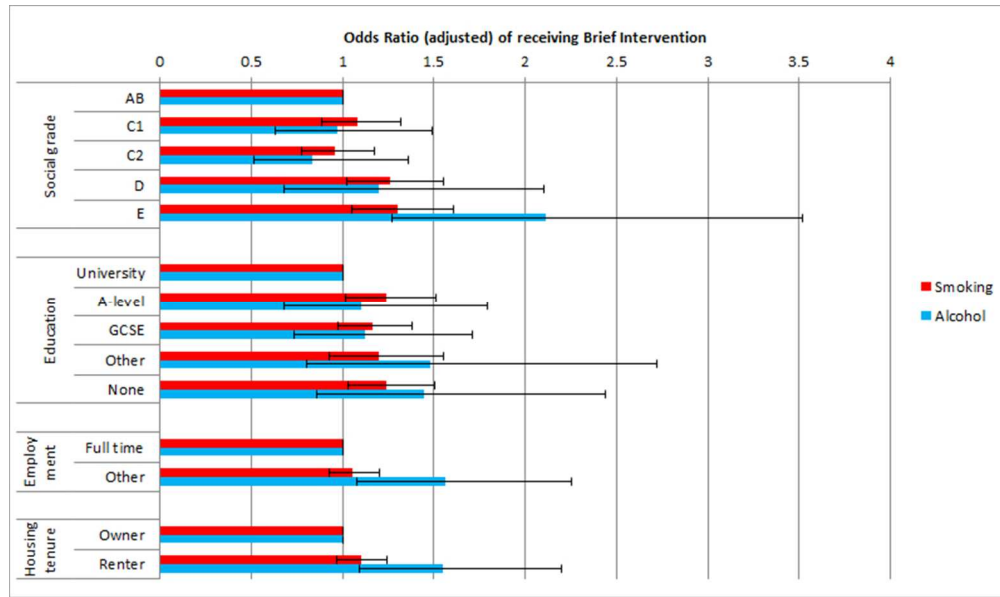

Figure 2 - Independent, fully-adjusted, association of socioeconomic status with Odds Ratio of receiving a Brief Intervention for smoking or risky drinking

211x125mm (96 x 96 DPI)

1

## The association between socioeconomic status and receipt of Brief Interventions for smoking and drinking: analysis of a population-based household survey: Supplementary material

### Outcome measures

Among smokers, BI receipt was assessed by asking 'Has your GP spoken to you about smoking in the past year (i.e. last 12 months)?' Respondents were encouraged to select all options that applied and were classified into those who received a BI (those selecting at least one of four options: i) 'Yes, he/she advised me to stop but did not offer anything'; ii) 'Yes, he/she suggested that I go to a specialist stop smoking advisor or group'; iii) 'Yes, he/she suggested that I see a nurse in the practice'; iv) 'Yes, he/she offered me a prescription for Champix/Zyban, a nicotine patch, nicotine gum or other nicotine product') and those who did not (i.e. those who did not select any of options i) to iv) but did select one of 'No, I have seen my GP in the last year but he/she has not spoken to me about smoking' or 'Yes, he/she asked me about my smoking but did not advise me to stop smoking').

Among risky drinkers, BI receipt was assessed by asking 'In the last 12 months, has a doctor or other health worker within your GP surgery discussed your drinking?' Respondents were encouraged to select all options that applied and were classified into those who received a BI (those selecting at least one of three options: i) 'Yes, a doctor or other health worker within my GP surgery offered advice about cutting down my drinking'; ii) 'Yes, a doctor or other health worker within my GP surgery offered help or support within the surgery to help me cut down'; iii) 'Yes, a doctor or other health working within my GP surgery referred me to an alcohol service or advised me to seek specialist help') and those who did not (i.e. those who did not select any of options i) to iii) but did select one of 'No, I have seen a doctor or health worker within my GP surgery but did not discuss my drinking' or 'Yes, a doctor or other health worker within my GP surgery asked about my drinking').



2

## Behaviour-adjusted model results for smoking

Table S1 – Logistic regression results for factors associated with likelihood of receiving Brief Intervention for smoking

|                                |            | Behaviour-adjusted model |              |
|--------------------------------|------------|--------------------------|--------------|
|                                |            | OR                       | 95% CI       |
| Age                            | 18-24      |                          |              |
|                                | 25-34      | 1.36 **                  | 1.12 to 1.65 |
|                                | 35-44      | 1.56 ***                 | 1.28 to 1.91 |
|                                | 45-54      | 1.98 ***                 | 1.63 to 2.41 |
|                                | 55-64      | 2.23 ***                 | 1.81 to 2.75 |
|                                | 65+        | 2.14 ***                 | 1.73 to 2.65 |
| Gender                         | Male       |                          |              |
|                                | Female     | 0.97                     | 0.86 to 1.09 |
| Region                         | North      |                          |              |
|                                | Midlands   | 0.93                     | 0.81 to 1.07 |
|                                | South      | 0.78 ***                 | 0.68 to 0.89 |
| Children in the household      | None       |                          |              |
|                                | ≥1         | 1.08                     | 0.94 to 1.25 |
| Self-reported disability       | No         |                          |              |
|                                | Yes        | 1.40 ***                 | 1.21 to 1.62 |
| Ethnicity                      | White      |                          |              |
|                                | Mixed race | 0.87                     | 0.56 to 1.35 |
|                                | Asian      | 0.86                     | 0.67 to 1.11 |
|                                | Black      | 1.00                     | 0.68 to 1.49 |
|                                | Arab/other | 0.92                     | 0.51 to 1.66 |
| Time trend (monthly)           |            | 1.00                     | 1 to 1.01    |
| Risky drinker (AUDIT 8+)       | No         | Reference                |              |
|                                | Yes        | 0.84 *                   | 0.73 to 0.97 |
| Motivation to cut down smoking | None       | Reference                |              |
|                                | Moderate   | 1.42 ***                 | 1.25 to 1.63 |
|                                | High       | 2.14 ***                 | 1.79 to 2.57 |
| Constant                       |            | 0.37 *                   | 0.17 to 0.8  |

3

## Behaviour-adjusted model results for risky drinking

Table S2 – Logistic regression results for factors associated with likelihood of receiving Brief Intervention for risky drinking

|                                 |            | Behaviour-adjusted model |     |               |
|---------------------------------|------------|--------------------------|-----|---------------|
|                                 |            | OR                       |     | 95% CI        |
| Age                             | 18-24      |                          |     |               |
|                                 | 25-34      | 1.44                     |     | 0.76 to 2.75  |
|                                 | 35-44      | 2.11                     | *   | 1.12 to 3.96  |
|                                 | 45-54      | 3.00                     | *** | 1.72 to 5.23  |
|                                 | 55-64      | 3.30                     | *** | 1.8 to 6.03   |
|                                 | 65+        | 5.00                     | *** | 2.71 to 9.23  |
| Gender                          | Male       |                          |     |               |
|                                 | Female     | 0.64                     | *   | 0.45 to 0.91  |
| Region                          | North      |                          |     |               |
|                                 | Midlands   | 1.18                     |     | 0.8 to 1.75   |
|                                 | South      | 0.80                     |     | 0.56 to 1.13  |
| Children in the household       | None       |                          |     |               |
|                                 | ≥1         | 1.06                     |     | 0.69 to 1.63  |
| Self-reported disability        | No         |                          |     |               |
|                                 | Yes        | 2.27                     | *** | 1.57 to 3.27  |
| Ethnicity                       | White      |                          |     |               |
|                                 | Mixed race | 2.19                     |     | 0.7 to 6.86   |
|                                 | Asian      | 3.38                     |     | 0.68 to 16.88 |
|                                 | Black      | 0.19                     |     | 0.02 to 1.62  |
|                                 | Arab/other | 8.64                     | **  | 1.81 to 41.21 |
| Time trend (monthly)            |            | 1.00                     |     | 0.98 to 1.02  |
| Past year smoker                | No         | Reference                |     |               |
|                                 | Yes        | 1.20                     |     | 0.86 to 1.66  |
| Motivation to cut down drinking | None       | Reference                |     |               |
|                                 | Moderate   | 2.85                     | *** | 2 to 4.05     |
|                                 | High       | 5.17                     | *** | 3.29 to 8.14  |
| AUDIT Score                     | 8-15       | Reference                |     |               |
|                                 | 16-19      | 2.94                     | *** | 1.81 to 4.79  |
|                                 | 20+        | 11.84                    | *** | 7.77 to 18.04 |
| Constant                        |            | 0.01                     | *** | 0 to 0.08     |

1  
2  
3  
4  
5  
6  
7  
8  
9  
10  
11  
12  
13  
14  
15  
16  
17  
18  
19  
20  
21  
22  
23  
24  
25  
26  
27  
28  
29  
30  
31  
32  
33  
34  
35  
36  
37  
38  
39  
40  
41  
42  
43  
44  
45  
46  
47

4

Analysis using unweighted data

Table S3 - Descriptive analysis of prevalence, GP attendance and BI delivery rates for smokers and risky drinkers by socioeconomic status (unweighted, 95% Confidence Intervals in brackets)

|                |            | Past year smokers        |                         |                          | Risky drinkers           |                         |                          |
|----------------|------------|--------------------------|-------------------------|--------------------------|--------------------------|-------------------------|--------------------------|
|                |            | Prevalence in population | Visited GP in past year | Received BI   visited GP | Prevalence in population | Visited GP in past year | Received BI   visited GP |
| Population     |            | 20.6% (20.3 to 21)       | 64.8% (63.9 to 65.7)    | 49.7% (48.5 to 50.9)     | 12.6% (12.3 to 12.7)     | 65.4% (64.2 to 66)      | 6.5% (5.7 to 6.9)        |
| Social grade   | AB         | 11.2% (10.6 to 11.8)     | 65.1% (62.4 to 67.9)    | 47.5% (43.9 to 51)       | 13.6% (12.9 to 13.9)     | 69.4% (67 to 70.7)      | 5.6% (4.2 to 6.4)        |
|                | C1         | 17.5% (16.9 to 18.1)     | 64.4% (62.6 to 66.3)    | 48.6% (46.2 to 51)       | 14.3% (13.8 to 14.6)     | 66% (64 to 67)          | 5% (3.9 to 5.6)          |
|                | C2         | 23.4% (22.5 to 24.2)     | 61.3% (59.3 to 63.3)    | 46.6% (44.1 to 49.2)     | 12.2% (11.5 to 12.5)     | 61.9% (59.2 to 63.3)    | 5.2% (3.6 to 6.1)        |
|                | D          | 26.8% (25.8 to 27.8)     | 63.9% (61.8 to 66)      | 50.5% (47.8 to 53.2)     | 9.3% (8.7 to 9.7)        | 65.3% (61.8 to 67)      | 6.9% (4.6 to 8)          |
|                | E          | 34.3% (33 to 35.5)       | 70.5% (68.5 to 72.6)    | 55.2% (52.4 to 57.9)     | 10.9% (10.1 to 11.4)     | 60.5% (56.5 to 62.5)    | 17% (13.1 to 19.1)       |
| Education      | University | 12.7% (12.2 to 13.3)     | 61.9% (59.6 to 64.2)    | 45.8% (42.8 to 48.8)     | 12.7% (12.1 to 13)       | 67.1% (64.9 to 68.2)    | 5.5% (4.2 to 6.2)        |
|                | A-level    | 20.8% (20 to 21.6)       | 62.1% (59.9 to 64.3)    | 49.3% (46.4 to 52.1)     | 18.7% (17.9 to 19.1)     | 58.8% (56.4 to 60)      | 4.8% (3.5 to 5.5)        |
|                | GCSE       | 25.7% (25 to 26.4)       | 65.4% (63.8 to 66.9)    | 48.4% (46.4 to 50.5)     | 12.6% (12 to 12.9)       | 66.8% (64.5 to 67.9)    | 7% (5.5 to 7.8)          |
|                | Other      | 18.2% (17 to 19.5)       | 66.5% (63 to 69.9)      | 51.3% (46.8 to 55.8)     | 10.9% (9.9 to 11.4)      | 71.2% (66.8 to 73.4)    | 7.6% (4.6 to 9.2)        |
|                | None       | 25.9% (25 to 26.9)       | 67.8% (65.9 to 69.8)    | 54% (51.5 to 56.6)       | 6.7% (6.1 to 6.9)        | 70.7% (66.9 to 72.6)    | 11% (7.9 to 12.5)        |
| Employment     | Full time  | 22.1% (21.4 to 22.7)     | 57.2% (55.5 to 58.8)    | 46.9% (44.8 to 49.1)     | 15.9% (15.3 to 16.2)     | 60.7% (58.8 to 61.6)    | 4.3% (3.3 to 4.8)        |
|                | Other      | 19.9% (19.5 to 20.4)     | 69.1% (67.9 to 70.2)    | 51% (49.5 to 52.5)       | 10.9% (10.5 to 11.1)     | 68.8% (67.3 to 69.6)    | 7.8% (6.8 to 8.4)        |
| Housing tenure | Owner      | 13.2% (12.8 to 13.6)     | 65.8% (64.3 to 67.3)    | 49.2% (47.2 to 51.1)     | 11.6% (11.2 to 11.8)     | 68.9% (67.3 to 69.7)    | 5.4% (4.5 to 5.9)        |
|                | Renter     | 32.5% (31.8 to 33.2)     | 64.5% (63.3 to 65.7)    | 50.2% (48.6 to 51.8)     | 14.2% (13.7 to 14.5)     | 61.1% (59.3 to 62.1)    | 8.1% (6.7 to 8.8)        |

5

**Table S4 – Unweighted logistic regression results for factors associated with likelihood of receiving Brief Intervention for smoking: demographic- and behaviour-adjusted models**

|                                |            | Demographic-adjusted model |                  | Behaviour-adjusted model |                  |
|--------------------------------|------------|----------------------------|------------------|--------------------------|------------------|
|                                |            | OR                         | 95% CI           | OR                       | 95% CI           |
| Age                            | 18-24      | Reference                  |                  |                          |                  |
|                                | 25-34      | 1.36                       | *** 1.14 to 1.61 | 1.32                     | ** 1.1 to 1.59   |
|                                | 35-44      | 1.59                       | *** 1.33 to 1.9  | 1.60                     | *** 1.33 to 1.93 |
|                                | 45-54      | 2.02                       | *** 1.7 to 2.41  | 2.01                     | *** 1.67 to 2.42 |
|                                | 55-64      | 2.25                       | *** 1.88 to 2.7  | 2.31                     | *** 1.9 to 2.8   |
|                                | 65+        | 2.06                       | *** 1.71 to 2.48 | 2.16                     | *** 1.77 to 2.63 |
| Gender                         | Male       | Reference                  |                  |                          |                  |
|                                | Female     | 1.00                       | 0.91 to 1.11     | 0.98                     | 0.88 to 1.09     |
| Region                         | North      | Reference                  |                  |                          |                  |
|                                | Midlands   | 0.93                       | 0.82 to 1.06     | 0.92                     | 0.81 to 1.05     |
|                                | South      | 0.87                       | * 0.78 to 0.98   | 0.86                     | * 0.76 to 0.97   |
| Children in the household      | None       | Reference                  |                  |                          |                  |
|                                | ≥1         | 1.12                       | 0.99 to 1.26     | 1.07                     | 0.94 to 1.21     |
| Self-reported disability       | No         | Reference                  |                  |                          |                  |
|                                | Yes        | 1.43                       | *** 1.25 to 1.62 | 1.45                     | *** 1.26 to 1.66 |
| Ethnicity                      | White      | Reference                  |                  |                          |                  |
|                                | Mixed race | 0.83                       | 0.56 to 1.22     | 0.78                     | 0.52 to 1.17     |
|                                | Asian      | 0.94                       | 0.75 to 1.18     | 0.89                     | 0.7 to 1.12      |
|                                | Black      | 1.29                       | 0.92 to 1.81     | 1.12                     | 0.78 to 1.61     |
|                                | Arab/other | 1.04                       | 0.62 to 1.73     | 1.00                     | 0.57 to 1.76     |
| Time trend (monthly)           |            | 1.00                       | 0.99 to 1        | 1.00                     | 0.99 to 1.01     |
| Risky drinker (AUDIT 8+)       | No         | Reference                  |                  |                          |                  |
|                                | Yes        |                            |                  | 0.89                     | 0.78 to 1.01     |
| Motivation to cut down smoking | None       | Reference                  |                  |                          |                  |
|                                | Moderate   |                            |                  | 1.42                     | *** 1.25 to 1.6  |
|                                | High       |                            |                  | 2.21                     | *** 1.87 to 2.61 |
| Constant                       |            | 0.60                       | 0.31 to 1.19     | 0.46                     | * 0.23 to 0.95   |

Key: \* p<0.05, \*\* p<0.01, \*\*\*, p<0.001

6

**Table S5 - Unweighted logistic regression results for factors associated with likelihood of receiving Brief Intervention for smoking: socioeconomic adjusted models 1 & 2**

|                                |            | Socioeconomic-adjusted models 1 & 2 |              |          |              |
|--------------------------------|------------|-------------------------------------|--------------|----------|--------------|
|                                |            | OR                                  | 95% CI       | OR       | 95% CI       |
| Age                            | 18-24      | Reference                           |              |          |              |
|                                | 25-34      | 1.35 **                             | 1.12 to 1.62 | 1.34 **  | 1.12 to 1.61 |
|                                | 35-44      | 1.64 ***                            | 1.36 to 1.98 | 1.63 *** | 1.35 to 1.97 |
|                                | 45-54      | 2.05 ***                            | 1.7 to 2.47  | 2.04 *** | 1.7 to 2.46  |
|                                | 55-64      | 2.36 ***                            | 1.94 to 2.87 | 2.31 *** | 1.89 to 2.81 |
|                                | 65+        | 2.22 ***                            | 1.82 to 2.72 | 2.13 *** | 1.73 to 2.62 |
| Gender                         | Male       | Reference                           |              |          |              |
|                                | Female     | 0.96                                | 0.86 to 1.08 | 0.98     | 0.88 to 1.09 |
| Region                         | North      | Reference                           |              |          |              |
|                                | Midlands   | 0.93                                | 0.82 to 1.06 | 0.92     | 0.81 to 1.05 |
|                                | South      | 0.87 *                              | 0.77 to 0.99 | 0.86 *   | 0.76 to 0.98 |
| Children in the household      | None       | Reference                           |              |          |              |
|                                | ≥1         | 1.05                                | 0.92 to 1.2  | 1.06     | 0.93 to 1.21 |
| Self-reported disability       | No         | Reference                           |              |          |              |
|                                | Yes        | 1.38 ***                            | 1.2 to 1.58  | 1.42 *** | 1.24 to 1.63 |
| Ethnicity                      | White      | Reference                           |              |          |              |
|                                | Mixed race | 0.77                                | 0.51 to 1.16 | 0.79     | 0.52 to 1.19 |
|                                | Asian      | 0.86                                | 0.68 to 1.09 | 0.89     | 0.7 to 1.12  |
|                                | Black      | 1.10                                | 0.77 to 1.58 | 1.12     | 0.78 to 1.62 |
|                                | Arab/other | 1.01                                | 0.58 to 1.78 | 1.01     | 0.57 to 1.76 |
| Time trend (monthly)           |            | 1.00                                | 0.99 to 1.01 | 1.00     | 0.99 to 1.01 |
| Risky drinker (AUDIT 8+)       | No         | Reference                           |              |          |              |
|                                | Yes        | 0.90                                | 0.79 to 1.03 | 0.90     | 0.79 to 1.02 |
| Motivation to cut down smoking | None       | Reference                           |              |          |              |
|                                | Moderate   | 1.43 ***                            | 1.26 to 1.62 | 1.43 *** | 1.26 to 1.61 |
|                                | High       | 2.25 ***                            | 1.9 to 2.66  | 2.23 *** | 1.89 to 2.64 |
| Social grade                   | AB         | Reference                           |              |          |              |
|                                | C1         | 1.09                                | 0.9 to 1.31  |          |              |
|                                | C2         | 0.92                                | 0.76 to 1.12 |          |              |
|                                | D          | 1.21                                | 0.99 to 1.47 |          |              |
|                                | E          | 1.29 *                              | 1.06 to 1.58 |          |              |
| Education                      | University | Reference                           |              |          |              |
|                                | A-level    |                                     |              | 1.20 *   | 1 to 1.45    |
|                                | GCSE       |                                     |              | 1.10     | 0.94 to 1.29 |
|                                | Other      |                                     |              | 1.16     | 0.92 to 1.48 |
|                                | None       |                                     |              | 1.22 *   | 1.02 to 1.46 |
| Constant                       |            | 0.44 *                              | 0.21 to 0.92 | 0.41 *   | 0.19 to 0.85 |

Key: \* p&lt;0.05, \*\* p&lt;0.01, \*\*\*, p&lt;0.001

7

**Table S6 - Unweighted logistic regression results for factors associated with likelihood of receiving Brief Intervention for smoking: socioeconomic-adjusted models 3 & 4**

|                                |            | Socioeconomic-adjusted models 3 & 4 |                  |      |                  |
|--------------------------------|------------|-------------------------------------|------------------|------|------------------|
|                                |            | OR                                  | 95% CI           | OR   | 95% CI           |
| Age                            | 18-24      | Reference                           |                  |      |                  |
|                                | 25-34      | 1.34                                | ** 1.12 to 1.61  | 1.32 | ** 1.11 to 1.59  |
|                                | 35-44      | 1.62                                | *** 1.34 to 1.96 | 1.63 | *** 1.35 to 1.97 |
|                                | 45-54      | 2.03                                | *** 1.69 to 2.45 | 2.07 | *** 1.72 to 2.5  |
|                                | 55-64      | 2.31                                | *** 1.9 to 2.8   | 2.41 | *** 1.97 to 2.94 |
|                                | 65+        | 2.12                                | *** 1.73 to 2.59 | 2.27 | *** 1.85 to 2.78 |
| Gender                         | Male       | Reference                           |                  |      |                  |
|                                | Female     | 0.97                                | 0.87 to 1.08     | 0.98 | 0.87 to 1.09     |
| Region                         | North      | Reference                           |                  |      |                  |
|                                | Midlands   | 0.93                                | 0.81 to 1.06     | 0.93 | 0.81 to 1.06     |
|                                | South      | 0.86                                | * 0.76 to 0.97   | 0.85 | * 0.75 to 0.96   |
| Children in the household      | None       | Reference                           |                  |      |                  |
|                                | ≥1         | 1.06                                | 0.93 to 1.21     | 1.06 | 0.93 to 1.21     |
| Self-reported disability       | No         | Reference                           |                  |      |                  |
|                                | Yes        | 1.42                                | *** 1.24 to 1.63 | 1.41 | *** 1.22 to 1.62 |
| Ethnicity                      | White      | Reference                           |                  |      |                  |
|                                | Mixed race | 0.78                                | 0.52 to 1.17     | 0.77 | 0.51 to 1.16     |
|                                | Asian      | 0.88                                | 0.7 to 1.12      | 0.91 | 0.71 to 1.15     |
|                                | Black      | 1.12                                | 0.78 to 1.61     | 1.11 | 0.77 to 1.6      |
|                                | Arab/other | 1.01                                | 0.58 to 1.77     | 0.98 | 0.56 to 1.73     |
| Time trend (monthly)           |            | 1.00                                | 0.99 to 1.01     | 1.00 | 0.99 to 1.01     |
| Risky drinker (AUDIT 8+)       | No         | Reference                           |                  |      |                  |
|                                | Yes        | 0.89                                | 0.78 to 1.02     | 0.89 | 0.78 to 1.02     |
| Motivation to cut down smoking | None       | Reference                           |                  |      |                  |
|                                | Moderate   | 1.42                                | *** 1.26 to 1.61 | 1.43 | *** 1.26 to 1.61 |
|                                | High       | 2.22                                | *** 1.88 to 2.62 | 2.22 | *** 1.88 to 2.63 |
| Employment status              | Full-time  | Reference                           |                  |      |                  |
|                                | Other      | 1.07                                | 0.95 to 1.22     |      |                  |
| Housing tenure                 | Owned      | Reference                           |                  |      |                  |
|                                | Rented     |                                     |                  | 1.14 | * 1.01 to 1.27   |
| Constant                       |            | 0.45                                | * 0.22 to 0.92   | 0.43 | * 0.21 to 0.88   |

Key: \* p&lt;0.05, \*\* p&lt;0.01, \*\*\*, p&lt;0.001

8

**Table S7 - Unweighted logistic regression results for factors associated with likelihood of receiving Brief Intervention for risky alcohol use: demographic- and behaviour-adjusted models**

|                                 |            | Demographic-adjusted model |                  | Behaviour-adjusted model |                   |
|---------------------------------|------------|----------------------------|------------------|--------------------------|-------------------|
|                                 |            | OR                         | 95% CI           | OR                       | 95% CI            |
| Age                             | 18-24      | Reference                  |                  |                          |                   |
|                                 | 25-34      | 1.77                       | 1 to 3.15        | 1.62                     | 0.87 to 3.03      |
|                                 | 35-44      | 2.92                       | *** 1.7 to 5     | 2.52                     | ** 1.41 to 4.53   |
|                                 | 45-54      | 3.22                       | *** 1.98 to 5.24 | 3.44                     | *** 2.03 to 5.82  |
|                                 | 55-64      | 2.41                       | ** 1.45 to 4.01  | 3.52                     | *** 2.03 to 6.13  |
|                                 | 65+        | 2.54                       | *** 1.52 to 4.25 | 4.72                     | *** 2.68 to 8.3   |
| Gender                          | Male       | Reference                  |                  |                          |                   |
|                                 | Female     | 0.72                       | * 0.53 to 0.96   | 0.67                     | * 0.48 to 0.93    |
| Region                          | North      | Reference                  |                  |                          |                   |
|                                 | Midlands   | 1.26                       | 0.9 to 1.75      | 1.30                     | 0.9 to 1.88       |
|                                 | South      | 1.01                       | 0.75 to 1.36     | 0.96                     | 0.69 to 1.34      |
| Children in the household       | None       | Reference                  |                  |                          |                   |
|                                 | ≥1         | 0.72                       | 0.5 to 1.04      | 0.95                     | 0.64 to 1.41      |
| Self-reported disability        | No         | Reference                  |                  |                          |                   |
|                                 | Yes        | 2.91                       | *** 2.16 to 3.91 | 1.91                     | *** 1.36 to 2.68  |
| Ethnicity                       | White      | Reference                  |                  |                          |                   |
|                                 | Mixed race | 1.45                       | 0.5 to 4.19      | 1.61                     | 0.51 to 5.09      |
|                                 | Asian      | 2.15                       | 0.73 to 6.28     | 1.76                     | 0.51 to 6.08      |
|                                 | Black      | 0.78                       | 0.18 to 3.33     | 0.61                     | 0.13 to 2.88      |
|                                 | Arab/other | 3.90                       | 0.76 to 20.07    | 7.04                     | * 1.27 to 38.91   |
| Time trend (monthly)            |            | 1.00                       | 0.99 to 1.02     | 1.00                     | 0.99 to 1.02      |
| Past year smoker                | No         | Reference                  |                  |                          |                   |
|                                 | Yes        |                            |                  | 1.20                     | 0.88 to 1.64      |
| Motivation to cut down drinking | None       | Reference                  |                  |                          |                   |
|                                 | Moderate   |                            |                  | 2.64                     | *** 1.91 to 3.65  |
|                                 | High       |                            |                  | 4.54                     | *** 2.96 to 6.96  |
| AUDIT Score                     | 8-15       | Reference                  |                  |                          |                   |
|                                 | 16-19      |                            |                  | 2.78                     | *** 1.79 to 4.33  |
|                                 | 20+        |                            |                  | 11.88                    | *** 8.18 to 17.26 |
| Constant                        |            | 0.04                       | *** 0.01 to 0.22 | 0.01                     | *** 0 to 0.06     |

Key: \* p&lt;0.05, \*\* p&lt;0.01, \*\*\*, p&lt;0.001

9

**Table S8 - Unweighted logistic regression results for factors associated with likelihood of receiving Brief Intervention for risky alcohol use: socioeconomic-adjusted models 1 & 2**

|                                 |            | Socioeconomic-adjusted models 1 & 2 |                   |       |                  |
|---------------------------------|------------|-------------------------------------|-------------------|-------|------------------|
|                                 |            | OR                                  | 95% CI            | OR    | 95% CI           |
| Age                             | 18-24      | Reference                           |                   |       |                  |
|                                 | 25-34      | 1.59                                | 0.85 to 2.99      | 1.63  | 0.86 to 3.1      |
|                                 | 35-44      | 2.40                                | ** 1.33 to 4.33   | 2.54  | ** 1.39 to 4.64  |
|                                 | 45-54      | 3.22                                | *** 1.88 to 5.51  | 3.40  | *** 1.96 to 5.89 |
|                                 | 55-64      | 3.38                                | *** 1.93 to 5.92  | 3.43  | *** 1.93 to 6.09 |
|                                 | 65+        | 4.64                                | *** 2.61 to 8.23  | 4.51  | *** 2.49 to 8.16 |
| Gender                          | Male       | Reference                           |                   |       |                  |
|                                 | Female     | 0.66                                | * 0.47 to 0.91    | 0.68  | * 0.49 to 0.94   |
| Region                          | North      | Reference                           |                   |       |                  |
|                                 | Midlands   | 1.31                                | 0.91 to 1.9       | 1.29  | 0.9 to 1.87      |
|                                 | South      | 1.01                                | 0.73 to 1.41      | 0.99  | 0.71 to 1.38     |
| Children in the household       | None       | Reference                           |                   |       |                  |
|                                 | ≥1         | 0.96                                | 0.64 to 1.43      | 0.95  | 0.64 to 1.41     |
| Self-reported disability        | No         | Reference                           |                   |       |                  |
|                                 | Yes        | 1.67                                | ** 1.17 to 2.38   | 1.84  | ** 1.3 to 2.6    |
| Ethnicity                       | White      | Reference                           |                   |       |                  |
|                                 | Mixed race | 1.60                                | 0.5 to 5.08       | 1.57  | 0.49 to 4.99     |
|                                 | Asian      | 1.69                                | 0.5 to 5.73       | 1.80  | 0.52 to 6.22     |
|                                 | Black      | 0.52                                | 0.11 to 2.47      | 0.61  | 0.13 to 2.88     |
|                                 | Arab/other | 7.78                                | * 1.43 to 42.22   | 6.80  | * 1.21 to 38.21  |
| Time trend (monthly)            |            | 1.00                                | 0.99 to 1.02      | 1.00  | 0.99 to 1.02     |
| Past year smoker                | No         | Reference                           |                   |       |                  |
|                                 | Yes        | 1.08                                | 0.78 to 1.49      | 1.17  | 0.85 to 1.6      |
| Motivation to cut down drinking | None       | Reference                           |                   |       |                  |
|                                 | Moderate   | 2.74                                | *** 1.98 to 3.8   | 2.70  | *** 1.95 to 3.73 |
|                                 | High       | 4.66                                | *** 3.03 to 7.17  | 4.61  | *** 3 to 7.08    |
| AUDIT Score                     | 8-15       | Reference                           |                   |       |                  |
|                                 | 16-19      | 2.62                                | *** 1.68 to 4.09  | 2.70  | *** 1.74 to 4.21 |
|                                 | 20+        | 10.77                               | *** 7.38 to 15.73 | 11.69 | *** 8.04 to 17   |
| Social grade                    | AB         | Reference                           |                   |       |                  |
|                                 | C1         | 1.05                                | 0.71 to 1.55      |       |                  |
|                                 | C2         | 0.89                                | 0.56 to 1.42      |       |                  |
|                                 | D          | 1.32                                | 0.79 to 2.2       |       |                  |
|                                 | E          | 2.09                                | ** 1.28 to 3.41   |       |                  |
| Education                       | University | Reference                           |                   |       |                  |
|                                 | A-level    |                                     |                   | 1.09  | 0.7 to 1.69      |
|                                 | GCSE       |                                     |                   | 1.12  | 0.76 to 1.65     |
|                                 | Other      |                                     |                   | 1.32  | 0.76 to 2.3      |
| Constant                        | None       |                                     |                   | 1.36  | 0.84 to 2.2      |
| Constant                        |            | 0.01                                | *** 0 to 0.06     | 0.01  | *** 0 to 0.05    |

Key: \* p&lt;0.05, \*\* p&lt;0.01, \*\*\*, p&lt;0.001



10

**Table S9 - Unweighted logistic regression results for factors associated with likelihood of receiving Brief Intervention for risky alcohol use: socioeconomic-adjusted models 3 & 4**

|                                 |            | Socioeconomic-adjusted models 3 & 4 |               |           |               |
|---------------------------------|------------|-------------------------------------|---------------|-----------|---------------|
|                                 |            | OR                                  | 95% CI        | OR        | 95% CI        |
| Age                             | 18-24      | Reference                           |               |           |               |
|                                 | 25-34      | 1.83                                | 0.97 to 3.45  | 1.70      | 0.91 to 3.18  |
|                                 | 35-44      | 2.91 ***                            | 1.6 to 5.27   | 2.83 **   | 1.57 to 5.12  |
|                                 | 45-54      | 3.86 ***                            | 2.26 to 6.6   | 3.98 ***  | 2.33 to 6.82  |
|                                 | 55-64      | 3.53 ***                            | 2.03 to 6.13  | 4.30 ***  | 2.43 to 7.61  |
|                                 | 65+        | 4.19 ***                            | 2.37 to 7.4   | 5.94 ***  | 3.3 to 10.69  |
| Gender                          | Male       | Reference                           |               |           |               |
|                                 | Female     | 0.63 **                             | 0.45 to 0.88  | 0.67 *    | 0.48 to 0.93  |
| Region                          | North      | Reference                           |               |           |               |
|                                 | Midlands   | 1.32                                | 0.91 to 1.9   | 1.32      | 0.92 to 1.91  |
|                                 | South      | 0.95                                | 0.68 to 1.32  | 0.98      | 0.7 to 1.36   |
| Children in the household       | None       | Reference                           |               |           |               |
|                                 | ≥1         | 0.96                                | 0.64 to 1.43  | 0.96      | 0.65 to 1.44  |
| Self-reported disability        | No         | Reference                           |               |           |               |
|                                 | Yes        | 1.75 **                             | 1.24 to 2.47  | 1.72 **   | 1.22 to 2.44  |
| Ethnicity                       | White      | Reference                           |               |           |               |
|                                 | Mixed race | 1.58                                | 0.5 to 5.03   | 1.53      | 0.49 to 4.81  |
|                                 | Asian      | 1.84                                | 0.54 to 6.26  | 1.66      | 0.48 to 5.74  |
|                                 | Black      | 0.57                                | 0.12 to 2.73  | 0.57      | 0.12 to 2.7   |
|                                 | Arab/other | 6.66 *                              | 1.16 to 38.28 | 7.28 *    | 1.28 to 41.44 |
| Time trend (monthly)            |            | 1.00                                | 0.99 to 1.02  | 1.00      | 0.99 to 1.02  |
| Past year smoker                | No         | Reference                           |               |           |               |
|                                 | Yes        | 1.17                                | 0.85 to 1.6   | 1.05      | 0.76 to 1.45  |
| Motivation to cut down drinking | None       | Reference                           |               |           |               |
|                                 | Moderate   | 2.64 ***                            | 1.91 to 3.65  | 2.73 ***  | 1.97 to 3.78  |
|                                 | High       | 4.38 ***                            | 2.85 to 6.73  | 4.58 ***  | 2.99 to 7.02  |
| AUDIT Score                     | 8-15       | Reference                           |               |           |               |
|                                 | 16-19      | 2.73 ***                            | 1.76 to 4.25  | 2.72 ***  | 1.75 to 4.23  |
|                                 | 20+        | 11.43 ***                           | 7.86 to 16.64 | 11.32 *** | 7.78 to 16.48 |
| Employment status               | Full-time  | Reference                           |               |           |               |
|                                 | Other      | 1.62 **                             | 1.14 to 2.29  |           |               |
| Housing tenure                  | Owned      | Reference                           |               |           |               |
|                                 | Rented     |                                     |               | 1.65 **   | 1.18 to 2.3   |
| Constant                        |            | 0.01 ***                            | 0 to 0.05     | 0.01 ***  | 0 to 0.04     |

Key: \* p<0.05, \*\* p<0.01, \*\*\*, p<0.001

Figure S1 – Unweighted independent effects of four measures of socioeconomic status on Odds Ratio of receiving a Brief Intervention for smoking or risky drinking

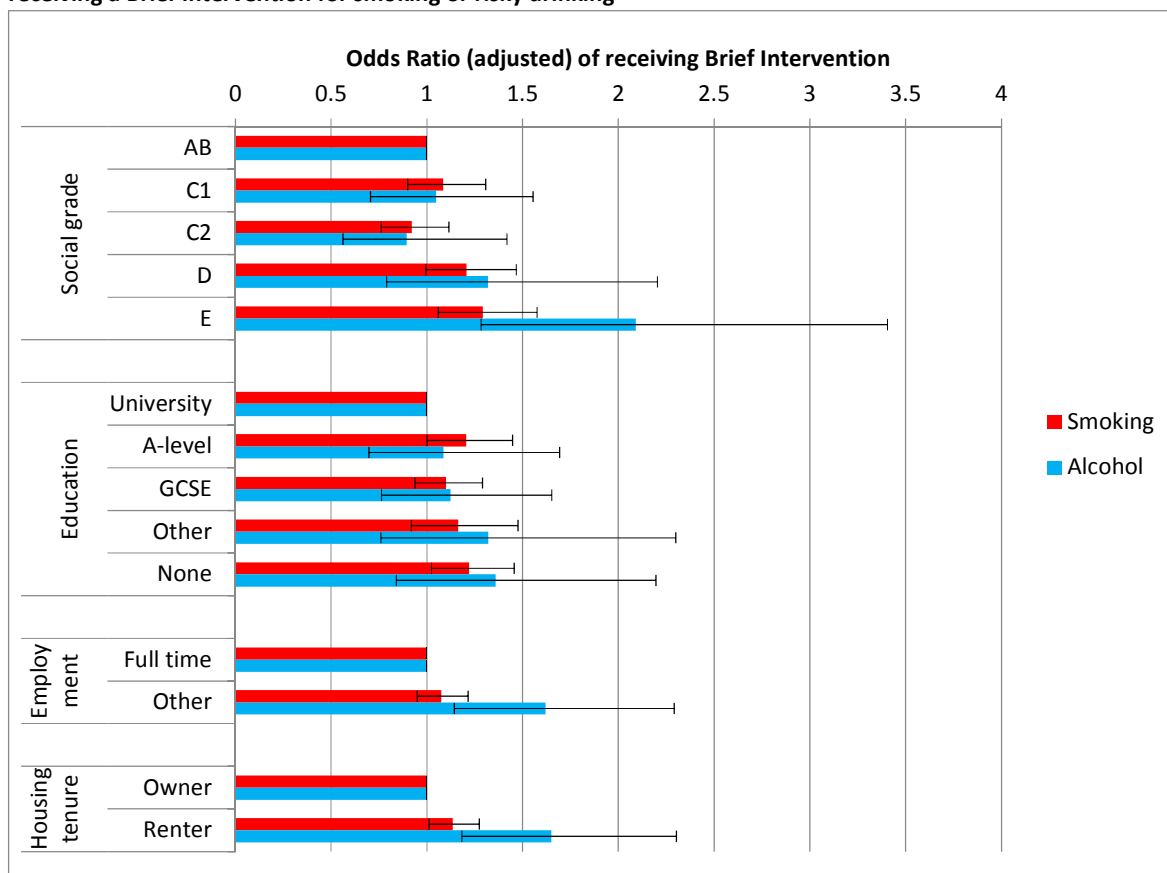

Review only

12

## Analysis using complete cases only

**Table S10 - Logistic regression results for factors associated with likelihood of receiving Brief Intervention for smoking: demographic- and behaviour-adjusted models**

|                                |            | Demographic-adjusted model |                  | Behaviour-adjusted model |                  |
|--------------------------------|------------|----------------------------|------------------|--------------------------|------------------|
|                                |            | OR                         | 95% CI           | OR                       | 95% CI           |
| Age                            | 18-24      | Reference                  |                  |                          |                  |
|                                | 25-34      | 1.37                       | ** 1.14 to 1.65  | 1.34                     | ** 1.1 to 1.63   |
|                                | 35-44      | 1.54                       | *** 1.27 to 1.87 | 1.53                     | *** 1.25 to 1.88 |
|                                | 45-54      | 2.00                       | *** 1.66 to 2.42 | 1.98                     | *** 1.63 to 2.42 |
|                                | 55-64      | 2.17                       | *** 1.78 to 2.64 | 2.19                     | *** 1.77 to 2.71 |
|                                | 65+        | 2.04                       | *** 1.67 to 2.49 | 2.13                     | *** 1.71 to 2.64 |
| Gender                         | Male       | Reference                  |                  |                          |                  |
|                                | Female     | 1.01                       | 0.91 to 1.13     | 0.97                     | 0.86 to 1.09     |
| Region                         | North      | Reference                  |                  |                          |                  |
|                                | Midlands   | 0.94                       | 0.82 to 1.07     | 0.93                     | 0.81 to 1.07     |
|                                | South      | 0.80                       | ** 0.7 to 0.91   | 0.78                     | *** 0.68 to 0.89 |
| Children in the household      | None       | Reference                  |                  |                          |                  |
|                                | ≥1         | 1.14                       | 1 to 1.31        | 1.08                     | 0.94 to 1.25     |
| Self-reported disability       | No         | Reference                  |                  |                          |                  |
|                                | Yes        | 1.39                       | *** 1.21 to 1.6  | 1.42                     | *** 1.23 to 1.64 |
| Ethnicity                      | White      | Reference                  |                  |                          |                  |
|                                | Mixed race | 0.93                       | 0.61 to 1.41     | 0.86                     | 0.55 to 1.34     |
|                                | Asian      | 0.88                       | 0.69 to 1.12     | 0.81                     | 0.63 to 1.05     |
|                                | Black      | 1.14                       | 0.79 to 1.64     | 0.94                     | 0.64 to 1.4      |
|                                | Arab/other | 0.97                       | 0.56 to 1.67     | 0.94                     | 0.52 to 1.71     |
| Time trend (monthly)           |            | 1.00                       | 0.99 to 1.01     | 1.00                     | 1 to 1.01        |
| Risky drinker (AUDIT 8+)       | No         | Reference                  |                  |                          |                  |
|                                | Yes        |                            |                  | 0.86                     | * 0.74 to 0.99   |
| Motivation to cut down smoking | None       | Reference                  |                  |                          |                  |
|                                | Moderate   |                            |                  | 1.40                     | *** 1.22 to 1.6  |
|                                | High       |                            |                  | 2.13                     | *** 1.77 to 2.55 |
| Constant                       |            | 0.45                       | * 0.21 to 0.93   | 0.33                     | ** 0.15 to 0.73  |

Key: \* p&lt;0.05, \*\* p&lt;0.01, \*\*\*, p&lt;0.001

13

**Table S11 - Logistic regression results for factors associated with likelihood of receiving Brief Intervention for smoking: socioeconomic-adjusted models 1 & 2**

|                                |            | Socioeconomic-adjusted models 1 & 2 |              |          |              |
|--------------------------------|------------|-------------------------------------|--------------|----------|--------------|
|                                |            | OR                                  | 95% CI       | OR       | 95% CI       |
| Age                            | 18-24      | Reference                           |              |          |              |
|                                | 25-34      | 1.36 **                             | 1.12 to 1.66 | 1.37 **  | 1.12 to 1.66 |
|                                | 35-44      | 1.58 ***                            | 1.29 to 1.94 | 1.58 *** | 1.28 to 1.94 |
|                                | 45-54      | 2.03 ***                            | 1.66 to 2.48 | 2.04 *** | 1.67 to 2.5  |
|                                | 55-64      | 2.26 ***                            | 1.83 to 2.79 | 2.22 *** | 1.79 to 2.75 |
|                                | 65+        | 2.21 ***                            | 1.77 to 2.75 | 2.11 *** | 1.69 to 2.65 |
| Gender                         | Male       | Reference                           |              |          |              |
|                                | Female     | 0.95                                | 0.84 to 1.07 | 0.96     | 0.86 to 1.09 |
| Region                         | North      | Reference                           |              |          |              |
|                                | Midlands   | 0.94                                | 0.81 to 1.08 | 0.92     | 0.79 to 1.06 |
|                                | South      | 0.79 **                             | 0.69 to 0.91 | 0.78 *** | 0.68 to 0.89 |
| Children in the household      | None       | Reference                           |              |          |              |
|                                | ≥1         | 1.07                                | 0.93 to 1.23 | 1.08     | 0.93 to 1.24 |
| Self-reported disability       | No         | Reference                           |              |          |              |
|                                | Yes        | 1.35 ***                            | 1.16 to 1.57 | 1.39 *** | 1.2 to 1.61  |
| Ethnicity                      | White      | Reference                           |              |          |              |
|                                | Mixed race | 0.84                                | 0.54 to 1.33 | 0.83     | 0.53 to 1.3  |
|                                | Asian      | 0.80                                | 0.62 to 1.03 | 0.83     | 0.64 to 1.08 |
|                                | Black      | 0.93                                | 0.62 to 1.37 | 0.97     | 0.65 to 1.44 |
|                                | Arab/other | 0.96                                | 0.53 to 1.74 | 0.92     | 0.51 to 1.68 |
| Time trend (monthly)           |            | 1.00                                | 1 to 1.01    | 1.00     | 1 to 1.01    |
| Risky drinker (AUDIT 8+)       | No         | Reference                           |              |          |              |
|                                | Yes        | 0.87                                | 0.76 to 1.01 | 0.87     | 0.75 to 1    |
| Motivation to cut down smoking | None       | Reference                           |              |          |              |
|                                | Moderate   | 1.42 ***                            | 1.24 to 1.62 | 1.41 *** | 1.23 to 1.62 |
|                                | High       | 2.18 ***                            | 1.81 to 2.62 | 2.14 *** | 1.78 to 2.58 |
| Social grade                   | AB         | Reference                           |              |          |              |
|                                | C1         | 1.09                                | 0.89 to 1.33 |          |              |
|                                | C2         | 0.95                                | 0.77 to 1.17 |          |              |
|                                | D          | 1.27 *                              | 1.03 to 1.57 |          |              |
|                                | E          | 1.32 *                              | 1.06 to 1.63 |          |              |
| Education                      | University | Reference                           |              |          |              |
|                                | A-level    |                                     |              | 1.23 *   | 1.01 to 1.51 |
|                                | GCSE       |                                     |              | 1.14     | 0.96 to 1.36 |
|                                | Other      |                                     |              | 1.19     | 0.92 to 1.55 |
|                                | None       |                                     |              | 1.24 *   | 1.02 to 1.5  |
| Constant                       |            | 0.31 **                             | 0.14 to 0.69 | 0.28 **  | 0.13 to 0.64 |

Key: \* p<0.05, \*\* p<0.01, \*\*\*, p<0.001

14

**Table S12 - Logistic regression results for factors associated with likelihood of receiving Brief Intervention for smoking: socioeconomic-adjusted models 3 & 4**

|                                |            | Socioeconomic-adjusted models 3 & 4 |                  |      |                  |
|--------------------------------|------------|-------------------------------------|------------------|------|------------------|
|                                |            | OR                                  | 95% CI           | OR   | 95% CI           |
| Age                            | 18-24      | Reference                           |                  |      |                  |
|                                | 25-34      | 1.35                                | ** 1.11 to 1.65  | 1.35 | ** 1.11 to 1.64  |
|                                | 35-44      | 1.55                                | *** 1.26 to 1.9  | 1.59 | *** 1.3 to 1.96  |
|                                | 45-54      | 1.99                                | *** 1.63 to 2.43 | 2.03 | *** 1.66 to 2.49 |
|                                | 55-64      | 2.19                                | *** 1.78 to 2.71 | 2.24 | *** 1.8 to 2.79  |
|                                | 65+        | 2.10                                | *** 1.69 to 2.61 | 2.24 | *** 1.79 to 2.8  |
| Gender                         | Male       | Reference                           |                  |      |                  |
|                                | Female     | 0.96                                | 0.85 to 1.08     | 0.99 | 0.87 to 1.11     |
| Region                         | North      | Reference                           |                  |      |                  |
|                                | Midlands   | 0.93                                | 0.81 to 1.08     | 0.93 | 0.8 to 1.07      |
|                                | South      | 0.78                                | *** 0.68 to 0.89 | 0.77 | *** 0.67 to 0.88 |
| Children in the household      | None       | Reference                           |                  |      |                  |
|                                | ≥1         | 1.08                                | 0.94 to 1.25     | 1.07 | 0.92 to 1.23     |
| Self-reported disability       | No         | Reference                           |                  |      |                  |
|                                | Yes        | 1.40                                | *** 1.2 to 1.62  | 1.41 | *** 1.21 to 1.64 |
| Ethnicity                      | White      | Reference                           |                  |      |                  |
|                                | Mixed race | 0.86                                | 0.55 to 1.34     | 0.86 | 0.55 to 1.33     |
|                                | Asian      | 0.81                                | 0.63 to 1.05     | 0.86 | 0.66 to 1.12     |
|                                | Black      | 0.95                                | 0.64 to 1.4      | 0.95 | 0.63 to 1.44     |
|                                | Arab/other | 0.95                                | 0.52 to 1.72     | 0.94 | 0.52 to 1.7      |
| Time trend (monthly)           |            | 1.00                                | 1 to 1.01        | 1.00 | 1 to 1.01        |
| Risky drinker (AUDIT 8+)       | No         | Reference                           |                  |      |                  |
|                                | Yes        | 0.86                                | * 0.74 to 0.99   | 0.86 | * 0.75 to 1      |
| Motivation to cut down smoking | None       | Reference                           |                  |      |                  |
|                                | Moderate   | 1.40                                | *** 1.22 to 1.6  | 1.39 | *** 1.21 to 1.59 |
|                                | High       | 2.13                                | *** 1.77 to 2.56 | 2.08 | *** 1.73 to 2.49 |
| Employment status              | Full-time  | Reference                           |                  |      |                  |
|                                | Other      | 1.05                                | 0.92 to 1.2      |      |                  |
| Housing tenure                 | Owned      | Reference                           |                  |      |                  |
|                                | Rented     |                                     |                  | 1.10 | 0.97 to 1.24     |
| Constant                       |            | 0.33                                | ** 0.15 to 0.72  | 0.31 | ** 0.14 to 0.69  |

Key: \* p<0.05, \*\* p<0.01, \*\*\*, p<0.001

15

**Table S13 - Logistic regression results for factors associated with likelihood of receiving Brief Intervention for risky alcohol use: demographic- and behaviour-adjusted models**

|                                 |            | Demographic-adjusted model |                  | Behaviour-adjusted model |                   |
|---------------------------------|------------|----------------------------|------------------|--------------------------|-------------------|
|                                 |            | OR                         | 95% CI           | OR                       | 95% CI            |
| Age                             | 18-24      | Reference                  |                  |                          |                   |
|                                 | 25-34      | 1.59                       | 0.84 to 3.01     | 1.45                     | 0.74 to 2.83      |
|                                 | 35-44      | 2.65                       | ** 1.45 to 4.82  | 2.28                     | * 1.2 to 4.31     |
|                                 | 45-54      | 2.82                       | *** 1.65 to 4.82 | 3.22                     | *** 1.83 to 5.65  |
|                                 | 55-64      | 2.37                       | ** 1.35 to 4.17  | 3.53                     | *** 1.93 to 6.48  |
|                                 | 65+        | 2.76                       | ** 1.55 to 4.92  | 5.45                     | *** 2.95 to 10.09 |
| Gender                          | Male       | Reference                  |                  |                          |                   |
|                                 | Female     | 0.65                       | * 0.47 to 0.9    | 0.62                     | ** 0.43 to 0.89   |
| Region                          | North      | Reference                  |                  |                          |                   |
|                                 | Midlands   | 1.23                       | 0.86 to 1.78     | 1.21                     | 0.81 to 1.8       |
|                                 | South      | 0.82                       | 0.6 to 1.14      | 0.77                     | 0.54 to 1.1       |
| Children in the household       | None       | Reference                  |                  |                          |                   |
|                                 | ≥1         | 0.79                       | 0.53 to 1.18     | 1.07                     | 0.7 to 1.65       |
| Self-reported disability        | No         | Reference                  |                  |                          |                   |
|                                 | Yes        | 3.52                       | *** 2.57 to 4.83 | 2.27                     | *** 1.57 to 3.28  |
| Ethnicity                       | White      | Reference                  |                  |                          |                   |
|                                 | Mixed race | 2.22                       | 0.74 to 6.63     | 2.19                     | 0.7 to 6.87       |
|                                 | Asian      | 1.06                       | 0.27 to 4.24     | 0.65                     | 0.13 to 3.33      |
|                                 | Black      | 0.32                       | 0.08 to 1.36     | 0.17                     | 0.02 to 1.16      |
|                                 | Arab/other | 4.61                       | 1 to 21.21       | 9.03                     | ** 1.87 to 43.55  |
| Time trend (monthly)            |            | 1.01                       | 0.99 to 1.02     | 1.01                     | 0.99 to 1.02      |
| Past year smoker                | No         | Reference                  |                  |                          |                   |
|                                 | Yes        |                            |                  | 1.25                     | 0.9 to 1.73       |
| Motivation to cut down drinking | None       | Reference                  |                  |                          |                   |
|                                 | Moderate   |                            |                  | 2.85                     | *** 1.99 to 4.08  |
|                                 | High       |                            |                  | 5.27                     | *** 3.32 to 8.36  |
| AUDIT Score                     | 8-15       | Reference                  |                  |                          |                   |
|                                 | 16-19      |                            |                  | 2.94                     | *** 1.79 to 4.82  |
|                                 | 20+        |                            |                  | 11.76                    | *** 7.68 to 18.02 |
| Constant                        |            | 0.03                       | *** 0 to 0.21    | 0.01                     | *** 0 to 0.06     |

Key: \* p<0.05, \*\* p<0.01, \*\*\*, p<0.001

16

**Table S14 - Logistic regression results for factors associated with likelihood of receiving Brief Intervention for risky alcohol use: socioeconomic-adjusted models 1 & 2**

|                                 |            | Socioeconomic-adjusted models 1 & 2 |               |           |               |
|---------------------------------|------------|-------------------------------------|---------------|-----------|---------------|
|                                 |            | OR                                  | 95% CI        | OR        | 95% CI        |
| Age                             | 18-24      | Reference                           |               |           |               |
|                                 | 25-34      | 1.49                                | 0.76 to 2.91  | 1.49      | 0.76 to 2.89  |
|                                 | 35-44      | 2.25 *                              | 1.19 to 4.26  | 2.33 *    | 1.23 to 4.41  |
|                                 | 45-54      | 3.12 ***                            | 1.76 to 5.54  | 3.22 ***  | 1.79 to 5.79  |
|                                 | 55-64      | 3.50 ***                            | 1.91 to 6.43  | 3.35 ***  | 1.8 to 6.24   |
|                                 | 65+        | 5.47 ***                            | 2.96 to 10.13 | 5.23 ***  | 2.78 to 9.85  |
| Gender                          | Male       | Reference                           |               |           |               |
|                                 | Female     | 0.60 **                             | 0.42 to 0.87  | 0.63 *    | 0.44 to 0.9   |
| Region                          | North      | Reference                           |               |           |               |
|                                 | Midlands   | 1.22                                | 0.82 to 1.81  | 1.22      | 0.82 to 1.81  |
|                                 | South      | 0.80                                | 0.56 to 1.16  | 0.81      | 0.56 to 1.16  |
| Children in the household       | None       | Reference                           |               |           |               |
|                                 | ≥1         | 1.07                                | 0.69 to 1.66  | 1.07      | 0.7 to 1.64   |
| Self-reported disability        | No         | Reference                           |               |           |               |
|                                 | Yes        | 2.01 ***                            | 1.37 to 2.95  | 2.18 ***  | 1.49 to 3.18  |
| Ethnicity                       | White      | Reference                           |               |           |               |
|                                 | Mixed race | 2.28                                | 0.71 to 7.33  | 2.11      | 0.68 to 6.59  |
|                                 | Asian      | 0.64                                | 0.13 to 3.15  | 0.66      | 0.13 to 3.34  |
|                                 | Black      | 0.15 *                              | 0.02 to 0.98  | 0.17      | 0.02 to 1.22  |
|                                 | Arab/other | 9.81 **                             | 2.03 to 47.41 | 8.65 **   | 1.74 to 42.91 |
| Time trend (monthly)            |            | 1.00                                | 0.99 to 1.02  | 1.00      | 0.99 to 1.02  |
| Past year smoker                | No         | Reference                           |               |           |               |
|                                 | Yes        | 1.13                                | 0.81 to 1.58  | 1.22      | 0.88 to 1.71  |
| Motivation to cut down drinking | None       | Reference                           |               |           |               |
|                                 | Moderate   | 2.94 ***                            | 2.04 to 4.23  | 2.95 ***  | 2.04 to 4.26  |
|                                 | High       | 5.35 ***                            | 3.36 to 8.53  | 5.47 ***  | 3.42 to 8.73  |
| AUDIT Score                     | 8-15       | Reference                           |               |           |               |
|                                 | 16-19      | 2.78 ***                            | 1.67 to 4.64  | 2.76 ***  | 1.67 to 4.55  |
|                                 | 20+        | 10.91 ***                           | 7.1 to 16.78  | 11.20 *** | 7.32 to 17.13 |
| Social grade                    | AB         | Reference                           |               |           |               |
|                                 | C1         | 1.02                                | 0.66 to 1.58  |           |               |
|                                 | C2         | 0.88                                | 0.53 to 1.44  |           |               |
|                                 | D          | 1.29                                | 0.73 to 2.26  |           |               |
|                                 | E          | 2.03 **                             | 1.2 to 3.42   |           |               |
| Education                       | University | Reference                           |               |           |               |
|                                 | A-level    |                                     |               | 1.16      | 0.72 to 1.88  |
|                                 | GCSE       |                                     |               | 1.17      | 0.76 to 1.79  |
|                                 | Other      |                                     |               | 1.50      | 0.81 to 2.81  |
| Constant                        | None       |                                     |               | 1.52      | 0.9 to 2.58   |
| Constant                        |            | 0.01 ***                            | 0 to 0.06     | 0.01 ***  | 0 to 0.06     |

Key: \* p&lt;0.05, \*\* p&lt;0.01, \*\*\*, p&lt;0.001

17

**Table S15 - Logistic regression results for factors associated with likelihood of receiving Brief Intervention for risky alcohol use: socioeconomic-adjusted models 3 & 4**

|                                 |            | Socioeconomic-adjusted models 3 & 4 |                  |       |                   |
|---------------------------------|------------|-------------------------------------|------------------|-------|-------------------|
|                                 |            | OR                                  | 95% CI           | OR    | 95% CI            |
| Age                             | 18-24      | Reference                           |                  |       |                   |
|                                 | 25-34      | 1.60                                | 0.8 to 3.21      | 1.59  | 0.81 to 3.12      |
|                                 | 35-44      | 2.49                                | ** 1.29 to 4.82  | 2.69  | ** 1.4 to 5.15    |
|                                 | 45-54      | 3.48                                | *** 1.94 to 6.25 | 3.81  | *** 2.13 to 6.82  |
|                                 | 55-64      | 3.44                                | *** 1.88 to 6.3  | 4.18  | *** 2.19 to 7.97  |
|                                 | 65+        | 4.78                                | *** 2.6 to 8.8   | 6.78  | *** 3.54 to 13.01 |
| Gender                          | Male       | Reference                           |                  |       |                   |
|                                 | Female     | 0.58                                | ** 0.4 to 0.84   | 0.60  | ** 0.42 to 0.87   |
| Region                          | North      | Reference                           |                  |       |                   |
|                                 | Midlands   | 1.19                                | 0.8 to 1.78      | 1.23  | 0.82 to 1.83      |
|                                 | South      | 0.76                                | 0.53 to 1.08     | 0.77  | 0.53 to 1.1       |
| Children in the household       | None       | Reference                           |                  |       |                   |
|                                 | ≥1         | 1.09                                | 0.7 to 1.69      | 1.03  | 0.66 to 1.59      |
| Self-reported disability        | No         | Reference                           |                  |       |                   |
|                                 | Yes        | 2.10                                | *** 1.43 to 3.09 | 2.10  | *** 1.43 to 3.08  |
| Ethnicity                       | White      | Reference                           |                  |       |                   |
|                                 | Mixed race | 2.18                                | 0.73 to 6.52     | 2.15  | 0.72 to 6.41      |
|                                 | Asian      | 0.69                                | 0.14 to 3.5      | 0.62  | 0.12 to 3.24      |
|                                 | Black      | 0.15                                | 0.02 to 1.11     | 0.16  | 0.02 to 1.1       |
|                                 | Arab/other | 8.36                                | * 1.55 to 45.13  | 9.37  | ** 1.86 to 47.14  |
| Time trend (monthly)            |            | 1.00                                | 0.98 to 1.02     | 1.00  | 0.98 to 1.02      |
| Past year smoker                | No         | Reference                           |                  |       |                   |
|                                 | Yes        | 1.20                                | 0.86 to 1.67     | 1.08  | 0.77 to 1.51      |
| Motivation to cut down drinking | None       | Reference                           |                  |       |                   |
|                                 | Moderate   | 2.93                                | *** 2.04 to 4.22 | 2.88  | *** 2 to 4.14     |
|                                 | High       | 5.25                                | *** 3.3 to 8.37  | 5.28  | *** 3.31 to 8.4   |
| AUDIT Score                     | 8-15       | Reference                           |                  |       |                   |
|                                 | 16-19      | 2.88                                | *** 1.74 to 4.76 | 2.95  | *** 1.77 to 4.9   |
|                                 | 20+        | 11.09                               | *** 7.2 to 17.1  | 12.06 | *** 7.81 to 18.62 |
| Employment status               | Full-time  | Reference                           |                  |       |                   |
|                                 | Other      | 1.53                                | * 1.06 to 2.21   |       |                   |
| Housing tenure                  | Owned      | Reference                           |                  |       |                   |
|                                 | Rented     |                                     |                  | 1.49  | * 1.05 to 2.13    |
| Constant                        |            | 0.01                                | *** 0 to 0.06    | 0.01  | *** 0 to 0.06     |

Key: \* p&lt;0.05, \*\* p&lt;0.01, \*\*\*, p&lt;0.001



Figure S2 - Independent effects of four measures of socioeconomic status on Odds Ratio of receiving a Brief Intervention for smoking or risky drinking

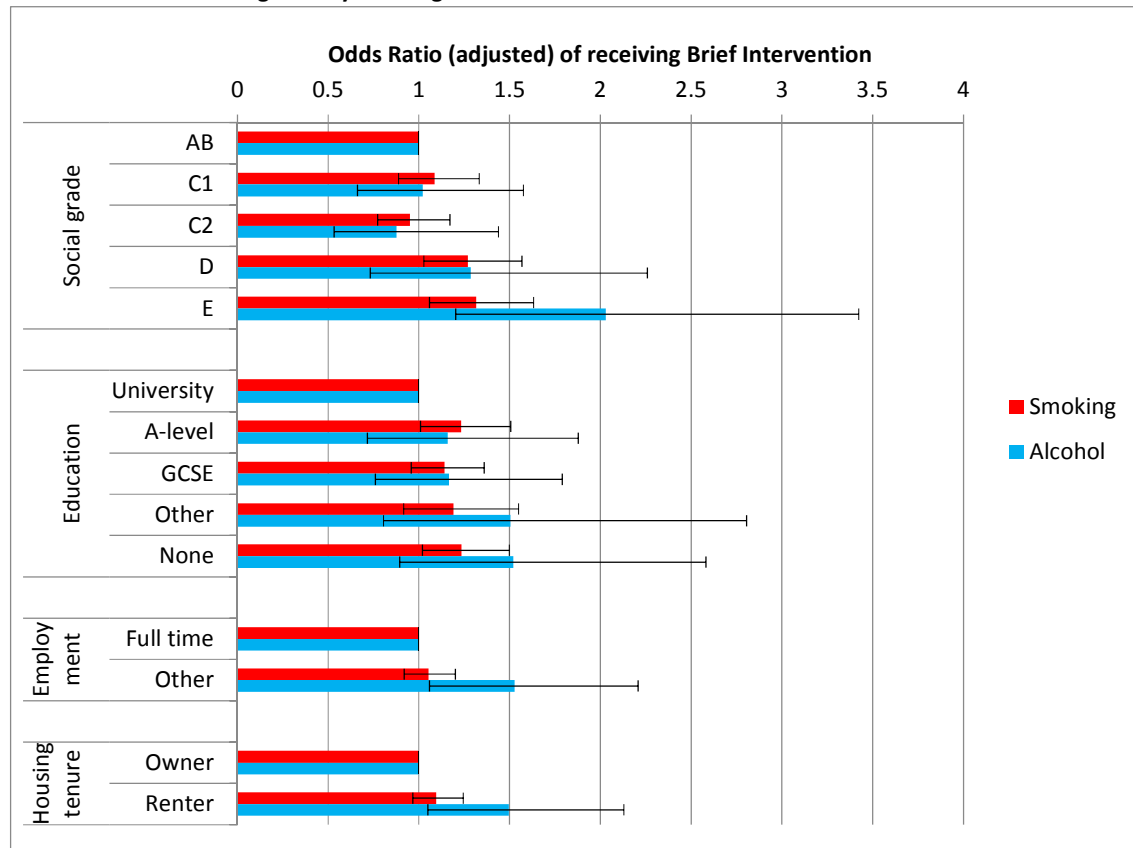

# Reporting checklist for cross sectional study.

Based on the STROBE cross sectional guidelines.

## Instructions to authors

Complete this checklist by entering the page numbers from your manuscript where readers will find each of the items listed below.

Your article may not currently address all the items on the checklist. Please modify your text to include the missing information. If you are certain that an item does not apply, please write "n/a" and provide a short explanation.

Upload your completed checklist as an extra file when you submit to a journal.

In your methods section, say that you used the STROBE cross sectional reporting guidelines, and cite them as:

von Elm E, Altman DG, Egger M, Pocock SJ, Gotsche PC, Vandembroucke JP. The Strengthening the Reporting of Observational Studies in Epidemiology (STROBE) Statement: guidelines for reporting observational studies.

|                        |     | Reporting Item                                                                                                                  | Page Number |
|------------------------|-----|---------------------------------------------------------------------------------------------------------------------------------|-------------|
| Title                  | #1a | Indicate the study's design with a commonly used term in the title or the abstract                                              | 1           |
| Abstract               | #1b | Provide in the abstract an informative and balanced summary of what was done and what was found                                 | 2           |
| Background / rationale | #2  | Explain the scientific background and rationale for the investigation being reported                                            | 3           |
| Objectives             | #3  | State specific objectives, including any prespecified hypotheses                                                                | 3           |
| Study design           | #4  | Present key elements of study design early in the paper                                                                         | 3           |
| Setting                | #5  | Describe the setting, locations, and relevant dates, including periods of recruitment, exposure, follow-up, and data collection | 3           |
| Eligibility criteria   | #6a | Give the eligibility criteria, and the sources and methods of selection of participants.                                        | 3           |

|    |                  |      |                                                                   |     |
|----|------------------|------|-------------------------------------------------------------------|-----|
| 1  |                  | #7   | Clearly define all outcomes, exposures, predictors, potential     | 3-4 |
| 2  |                  |      | confounders, and effect modifiers. Give diagnostic criteria, if   |     |
| 3  |                  |      | applicable                                                        |     |
| 4  |                  |      |                                                                   |     |
| 5  |                  |      |                                                                   |     |
| 6  | Data sources /   | #8   | For each variable of interest give sources of data and details of | 4   |
| 7  | measurement      |      | methods of assessment (measurement). Describe                     |     |
| 8  |                  |      | comparability of assessment methods if there is more than one     |     |
| 9  |                  |      | group. Give information separately for for exposed and            |     |
| 10 |                  |      | unexposed groups if applicable.                                   |     |
| 11 |                  |      |                                                                   |     |
| 12 |                  |      |                                                                   |     |
| 13 |                  |      |                                                                   |     |
| 14 | Bias             | #9   | Describe any efforts to address potential sources of bias         | 4   |
| 15 |                  |      |                                                                   |     |
| 16 |                  |      |                                                                   |     |
| 17 | Study size       | #10  | Explain how the study size was arrived at                         | 6   |
| 18 |                  |      |                                                                   |     |
| 19 | Quantitative     | #11  | Explain how quantitative variables were handled in the            | 3-4 |
| 20 | variables        |      | analyses. If applicable, describe which groupings were chosen,    |     |
| 21 |                  |      | and why                                                           |     |
| 22 |                  |      |                                                                   |     |
| 23 |                  |      |                                                                   |     |
| 24 | Statistical      | #12a | Describe all statistical methods, including those used to control | 4-5 |
| 25 | methods          |      | for confounding                                                   |     |
| 26 |                  |      |                                                                   |     |
| 27 |                  |      |                                                                   |     |
| 28 |                  | #12b | Describe any methods used to examine subgroups and                | n/a |
| 29 |                  |      | interactions                                                      |     |
| 30 |                  |      |                                                                   |     |
| 31 |                  |      |                                                                   |     |
| 32 |                  | #12c | Explain how missing data were addressed                           | 4   |
| 33 |                  |      |                                                                   |     |
| 34 |                  |      |                                                                   |     |
| 35 |                  | #12d | If applicable, describe analytical methods taking account of      | 4   |
| 36 |                  |      | sampling strategy                                                 |     |
| 37 |                  |      |                                                                   |     |
| 38 |                  |      |                                                                   |     |
| 39 |                  | #12e | Describe any sensitivity analyses                                 | 4   |
| 40 |                  |      |                                                                   |     |
| 41 | Participants     | #13a | Report numbers of individuals at each stage of study—eg           | 6   |
| 42 |                  |      | numbers potentially eligible, examined for eligibility, confirmed |     |
| 43 |                  |      | eligible, included in the study, completing follow-up, and        |     |
| 44 |                  |      | analysed. Give information separately for for exposed and         |     |
| 45 |                  |      | unexposed groups if applicable.                                   |     |
| 46 |                  |      |                                                                   |     |
| 47 |                  |      |                                                                   |     |
| 48 |                  |      |                                                                   |     |
| 49 |                  | #13b | Give reasons for non-participation at each stage                  | n/a |
| 50 |                  |      |                                                                   |     |
| 51 |                  |      |                                                                   |     |
| 52 |                  | #13c | Consider use of a flow diagram                                    | n/a |
| 53 |                  |      |                                                                   |     |
| 54 | Descriptive data | #14a | Give characteristics of study participants (eg demographic,       | 6   |
| 55 |                  |      | clinical, social) and information on exposures and potential      |     |
| 56 |                  |      | confounders. Give information separately for exposed and          |     |
| 57 |                  |      | unexposed groups if applicable.                                   |     |
| 58 |                  |      |                                                                   |     |
| 59 |                  |      |                                                                   |     |
| 60 |                  |      |                                                                   |     |

|    |                  |      |                                                                      |          |
|----|------------------|------|----------------------------------------------------------------------|----------|
| 1  |                  | #14b | Indicate number of participants with missing data for each           | 4        |
| 2  |                  |      | variable of interest                                                 |          |
| 3  |                  |      |                                                                      |          |
| 4  |                  |      |                                                                      |          |
| 5  | Outcome data     | #15  | Report numbers of outcome events or summary measures.                | 6        |
| 6  |                  |      | Give information separately for exposed and unexposed                |          |
| 7  |                  |      | groups if applicable.                                                |          |
| 8  |                  |      |                                                                      |          |
| 9  |                  |      |                                                                      |          |
| 10 | Main results     | #16a | Give unadjusted estimates and, if applicable, confounder-            | 7, 9, 12 |
| 11 |                  |      | adjusted estimates and their precision (eg, 95% confidence           |          |
| 12 |                  |      | interval). Make clear which confounders were adjusted for and        |          |
| 13 |                  |      | why they were included                                               |          |
| 14 |                  |      |                                                                      |          |
| 15 |                  |      |                                                                      |          |
| 16 |                  |      |                                                                      |          |
| 17 |                  | #16b | Report category boundaries when continuous variables were            | 5        |
| 18 |                  |      | categorized                                                          |          |
| 19 |                  |      |                                                                      |          |
| 20 |                  |      |                                                                      |          |
| 21 |                  | #16c | If relevant, consider translating estimates of relative risk into    | n/a      |
| 22 |                  |      | absolute risk for a meaningful time period                           |          |
| 23 |                  |      |                                                                      |          |
| 24 | Other analyses   | #17  | Report other analyses done—e.g., analyses of subgroups and           | 14       |
| 25 |                  |      | interactions, and sensitivity analyses                               |          |
| 26 |                  |      |                                                                      |          |
| 27 |                  |      |                                                                      |          |
| 28 | Key results      | #18  | Summarise key results with reference to study objectives             | 14       |
| 29 |                  |      |                                                                      |          |
| 30 |                  |      |                                                                      |          |
| 31 | Limitations      | #19  | Discuss limitations of the study, taking into account sources of     | 14       |
| 32 |                  |      | potential bias or imprecision. Discuss both direction and            |          |
| 33 |                  |      | magnitude of any potential bias.                                     |          |
| 34 |                  |      |                                                                      |          |
| 35 |                  |      |                                                                      |          |
| 36 | Interpretation   | #20  | Give a cautious overall interpretation considering objectives,       | 14-15    |
| 37 |                  |      | limitations, multiplicity of analyses, results from similar studies, |          |
| 38 |                  |      | and other relevant evidence.                                         |          |
| 39 |                  |      |                                                                      |          |
| 40 |                  |      |                                                                      |          |
| 41 | Generalisability | #21  | Discuss the generalisability (external validity) of the study        | 14-15    |
| 42 |                  |      | results                                                              |          |
| 43 |                  |      |                                                                      |          |
| 44 |                  |      |                                                                      |          |
| 45 | Funding          | #22  | Give the source of funding and the role of the funders for the       | 15       |
| 46 |                  |      | present study and, if applicable, for the original study on which    |          |
| 47 |                  |      | the present article is based                                         |          |
| 48 |                  |      |                                                                      |          |
| 49 |                  |      |                                                                      |          |

The STROBE checklist is distributed under the terms of the Creative Commons Attribution License CC-BY. This checklist was completed on 06. April 2018 using <http://www.goodreports.org/>, a tool made by the [EQUATOR Network](#) in collaboration with [Penelope.ai](#)

# BMJ Open

## Are Brief Interventions for smoking and excessive alcohol consumption in primary care affecting health inequalities? Findings from a population-based household survey in England

|                                 |                                                                                                                                                                                                                                                                                                                                                                                                                                                                                                                                                                                        |
|---------------------------------|----------------------------------------------------------------------------------------------------------------------------------------------------------------------------------------------------------------------------------------------------------------------------------------------------------------------------------------------------------------------------------------------------------------------------------------------------------------------------------------------------------------------------------------------------------------------------------------|
| Journal:                        | <i>BMJ Open</i>                                                                                                                                                                                                                                                                                                                                                                                                                                                                                                                                                                        |
| Manuscript ID                   | bmjopen-2018-023448.R1                                                                                                                                                                                                                                                                                                                                                                                                                                                                                                                                                                 |
| Article Type:                   | Research                                                                                                                                                                                                                                                                                                                                                                                                                                                                                                                                                                               |
| Date Submitted by the Author:   | 09-Oct-2018                                                                                                                                                                                                                                                                                                                                                                                                                                                                                                                                                                            |
| Complete List of Authors:       | Angus, Colin; University of Sheffield, School of Health and Related Research<br>Brown, Jamie; University College London, Psychology & Language Sciences<br>Beard, Emma; UCL,<br>Gillespie, Duncan; The University of Sheffield, School of Health and Related Research<br>Buykx, Penelope; University of Sheffield, School of Health and Related Research<br>Kaner, Eileen; Newcastle University, Institute<br>Michie, Susan; University College London, Centre for Outcomes Research and Effectiveness<br>Meier, Petra; University of Sheffield, School of Health and Related Research |
| <b>Primary Subject Heading</b>: | Public health                                                                                                                                                                                                                                                                                                                                                                                                                                                                                                                                                                          |
| Secondary Subject Heading:      | General practice / Family practice, Health policy, Smoking and tobacco                                                                                                                                                                                                                                                                                                                                                                                                                                                                                                                 |
| Keywords:                       | Alcohol, Smoking, Brief Interventions, Health Inequalities, PRIMARY CARE, PUBLIC HEALTH                                                                                                                                                                                                                                                                                                                                                                                                                                                                                                |
|                                 |                                                                                                                                                                                                                                                                                                                                                                                                                                                                                                                                                                                        |

SCHOLARONE™  
Manuscripts

1

# Are Brief Interventions for smoking and excessive alcohol consumption in primary care affecting health inequalities? Findings from a population-based household survey in England

Colin Angus\*, MSc, Sheffield Alcohol Research Group, School of Health and Related Research, University of Sheffield, UK

Jamie Brown, PhD, Health Behaviour Research Centre, Department of Epidemiology and Community health, University College London, UK

Emma Beard, PhD, Department of Clinical, Educational and Health Psychology, University College London, UK

Duncan Gillespie, PhD, Sheffield Alcohol Research Group, School of Health and Related Research, University of Sheffield, UK

Penny Buykx, PhD, Sheffield Alcohol Research Group, School of Health and Related Research, University of Sheffield, UK

Eileen Kaner, PhD, Institute of Health and Society, University of Newcastle upon Tyne, UK

Susan Michie, PhD, Department of Clinical, Educational and Health Psychology, University College London, UK

Petra S Meier, PhD, Sheffield Alcohol Research Group, School of Health and Related Research, University of Sheffield, UK

\* Corresponding author

Address: Regent Court, Regent Street, Sheffield, S1 4DA, UK

Tel 0114 2220686.

Email [c.r.angus@sheffield.ac.uk](mailto:c.r.angus@sheffield.ac.uk)

Word count: 3519

Keywords: Alcohol, Smoking, Brief Interventions, Health Inequalities, Primary Care, Public Health

**ABSTRACT****Objectives**

Brief Interventions [BI] for smoking and risky drinking are effective and cost-effective policy approaches to reducing alcohol harm currently used in primary care in England, however little is known about their contribution to health inequalities. This paper aims to investigate whether self-reported receipt of BI is associated with socioeconomic position and whether this differs for smoking or alcohol.

**Design**

Population survey of 8,978 smokers or risky drinkers in England aged 16+ taking part in the Alcohol and Smoking Toolkit Studies

**Measures**

Survey participants answered questions regarding whether they had received advice and support to cut down their drinking or smoking from a primary healthcare professional in the past 12 months as well as their socioeconomic position, demographic details, whether they smoke and their motivation to cut down their smoking and/or drinking. Respondents also completed the Alcohol Use Disorders Identification Test (AUDIT). Smokers were defined as those reporting any smoking in the past year. Risky drinkers were defined as those scoring 8 or more on the AUDIT.

**Results**

After adjusting for demographic factors and patterns in smoking and drinking, BI delivery was highest in lower socioeconomic groups. Smokers in the lowest social grade had 30% (95% CI 5% to 61%) greater odds of reporting receipt of a BI than those in the highest grade. The relationship for risky drinking appeared stronger, with those in the lowest social grade having 111% (95% CI 27% to 252%) greater odds of reporting BI receipt than the highest grade. Rates of BI delivery were 8 times greater among smokers than risky drinkers (48.3% vs 6.1%).

**Conclusions**

Current delivery of Brief Interventions for smoking and drinking in primary care in England may be contributing to a reduction in socioeconomic inequalities in health. This effect could be increased if intervention rates, particularly for drinking, were raised.

**ARTICLE SUMMARY****Strengths and limitations of this study**

- Used data from a large representative sample of adult smokers and drinkers in England
- Based on data on intervention receipt reported by patients, rather than practitioners
- Analysis controls for a broad range of potential confounding demographic factors
- Respondents may have underestimated or misreported their drinking or smoking
- There may be additional socioeconomic gradients in intervention effectiveness which could moderate the overall impact of Brief Interventions on health inequalities

## INTRODUCTION

Tobacco smoking and the excessive consumption of alcohol are leading causes of preventable disease both in the UK and worldwide [1] and inequalities in both alcohol and tobacco-related health harms are a significant contributor to wider inequalities in health [2,3]. Underlying these inequalities are conflicting socioeconomic patterns in the behaviours themselves. Smoking prevalence and related harm both increase with deprivation [4], while for alcohol consumption the picture is more complex. Those in more deprived groups are more likely to abstain from drinking, and those who drink are more likely to drink within UK drinking guidelines compared to less deprived groups [5], while those in more deprived groups who drink heavily drink more on average than heavy drinkers in less deprived groups [6]. As a result, numerous studies have found alcohol consumption to be lower in more deprived groups even though they suffer greater levels of alcohol-related harm [2,7,8], a phenomenon referred to as the 'Alcohol Harm Paradox' [7,9].

Screening and Brief Interventions, consisting of an initial case finding or screening step followed by delivery of feedback and structured advice or behaviour change counselling, delivered in primary care, is an effective and cost-effective measure to increase smoking cessation rates [10,11] and reduce harmful drinking [12,13]. Current UK clinical guidelines recommend that all patients are assessed for smoking annually, with a Brief Intervention (BI) delivered to all smokers [14]. Guidance for alcohol encourages the use of opportunistic screening and BI alongside requirements to screen all patients registering with a new primary care provider or attending a Health Check [15,16]. In spite of this guidance, BI delivery levels remain low in England [17], particularly for alcohol [18], a finding that has been replicated in many other countries [19–21].

Research across a broad range of interventions and settings has found that public health policies, including screening programmes in primary care, may exacerbate inequalities in health even while improving population health overall [22,23]. In this context it is striking that very little research to date has considered the potential for BI programmes for tobacco or alcohol to affect inequalities, particularly given the high socioeconomic variation in poor health due to both behaviours. We aimed to address this gap by examining whether there are sociodemographic gradients in BI delivery for smoking and drinking and whether these can be explained by sociodemographic or behavioural characteristics of patients attending primary care in England.

## METHODS

### Data Sources

The Alcohol and Smoking Toolkit Studies are large, nationally representative, monthly surveys of adults aged 16+ in England [24,25]. A sample of approximately 1,700 respondents each month participate in household computer-assisted interviews. The survey uses a form of random location sampling, representing a hybrid between random probability and simple quota sampling (see published protocols for further details [24,25]). We used data collected between March 2014 and July 2016 (N=48808) with analysis restricted to respondents who reported visiting the General Practitioner (GP) in the past 12 months and were either smokers (those reporting that they had smoked cigarettes or other tobacco products at least occasionally in the past year – see supplementary file for full details) or risky drinkers (those scoring at least eight on the Alcohol Use Disorders Identification Test (AUDIT) [26]). This gave a total sample of 9042 adults of whom 5004 were smokers only, 2528 were risky drinkers only, and 1446 were both (data on the smoking status of one risky drinker and the drinking status of 63 smokers were missing).



## Measures

Our primary outcome measure was self-reported receipt of a BI (or more intensive intervention) from a GP or other primary care-based health worker in the past year. Respondents who smoked were asked 'Has your GP spoken to you about smoking in the past year?' and BI receipt was categorised as a response of at least 'Yes, he/she advised me to stop but did not offer anything'. Risky drinkers were asked 'In the last 12 months has a doctor or other health worker within your GP surgery discussed your drinking?', with BI receipt categorised as a response of at least 'Yes, a doctor or other health worker within my GP surgery offered advice about cutting down my drinking'. Note that this definition includes referral to specialist treatment as recommended for those with potential alcohol dependence. See supplementary file for a full list of response options.

Data was also collected on respondents' age, gender, region of England (categorised as North, Midlands or South), the number of children in the household (categorised as 0 or 1+), self-reported disability status (disability/no disability) and ethnicity (white, mixed/multiple ethnic group, Asian or British Asian, black, other). Self-reported motivation to reduce smoking and drinking was recorded and grouped into those responding 'I don't want to stop smoking/cut down on drinking', those reporting some degree of motivation to quit/cut down, and those who were highly motivated and willing to specify a time frame for cutting down – 'I really want to stop smoking and intend to in the next month/3 months').

As previous studies have identified that different measures of socioeconomic position (SEP) demonstrate different relationships with alcohol consumption [6,9], we examined four alternative measures SEP:

- 1) Social grade, classified Using the British National Readership Survey Social-Grade Classification Tool [27]: A: higher managerial, administrative or professional; B: intermediate managerial, administrative or professional; C1: supervisory or clerical and junior managerial administrative or professional; C2: skilled manual workers; D: Semi and unskilled manual workers; E: Casual or lowest grade workers, pensioners and others who depend on the welfare state for their income.
- 2) Educational level, grouped as: University education, A-level and equivalent, GCSE/vocational, other/still studying, none
- 3) Working status, categorised as being in full-time employment or otherwise
- 4) Housing tenure, categorised as owner occupied (owned outright or being brought with a mortgage) or otherwise

Finally, in order to test whether higher levels of alcohol consumption increase the likelihood of receiving a BI, the risky drinker group were further subdivided according to their AUDIT score in line with World Health Organization guidelines [26]:

- 8-15 - Risky drinker
- 16-19 – High risk drinkers
- 20+ - Possible alcohol dependence

## Analysis

Data were weighted using an iterative 'rim weighting' technique as used in previous analyses of Smoking and Alcohol Toolkit data (e.g. [18]). Parallel analysis using unweighted data is reported in the supplementary file (Tables S1-S7 & Figure S1). Missing data were imputed using Multiple Imputation with 20 datasets [28] and analytical results combined using Rubin's Rules [29]. Complete case only analyses are reported in the supplementary material (Tables S8-S13 & Figure S2). All

1  
2  
3 imputation and analyses were undertaken using Stata 12 [30] following a plan pre-registered with  
4 the Open Science Framework prior to any data analysis (<https://osf.io/5eq4h/>). As the only  
5 continuous variable in the analysis, age was standardised and tested for non-linearity using the Box-  
6 Tidwell approach [31]. This suggested significant non-linearity and age was therefore categorised  
7 into six groups (18-24, 25-34, 35-44, 45-54, 55-64 and 65+).  
8

9 The analysis consisted of four steps:

- 10 1) we produced descriptive tables the full dataset showing rates of smoking and risky drinking (all  
11 respondents scoring AUDIT 8+) in the population and rates of GP attendance and BI receipt for those  
12 who visited their GP for both smokers and risky drinkers, stratified by the 4 socioeconomic measures  
13 to show the extent to which socioeconomic inequalities exist before adjusting for demographic and  
14 other factors.  
15  
16 2) to examine the extent to which variation in BI delivery among those at risk and attending primary  
17 care in the past year can be explained by demographic characteristics alone, we fitted two  
18 multivariable logistic regression models in which receipt of a smoking or alcohol intervention was  
19 regressed on age, gender, region, number of children in the household, disability status and ethnicity.  
20 These models also include a linear (monthly) temporal trend to assess whether BI rates have  
21 increased or decreased over the data collection period.  
22  
23 3) to examine the extent to which drinking and smoking behaviour, and motivations to cut down can  
24 explain additional variation in BI delivery, we fitted two further multivariable models which  
25 additionally adjust for drinking status (risky versus non-risky) and motivation to stop smoking (in the  
26 smoking model) or smoking status (smoker versus non-smoker), AUDIT group and motivation to cut  
27 down drinking (in the drinking model).  
28  
29 4) to examine whether socioeconomic position can explain any remaining variation in BI delivery, we  
30 fitted fully-adjusted models in which each of the 4 measures of socioeconomic position was added  
31 separately.  
32

### 33 **Patient and Public Involvement**

34  
35 Neither patients nor the public were involved in the design of this study. STROBE (Strengthening the  
36 Reporting of Observational Studies in Epidemiology) guidelines were followed throughout [32].  
37

## 38 **RESULTS**

### 39 **Descriptive statistics**

40  
41 Demographic characteristics for the 9042 smokers and risky drinkers included in the analytic sample  
42 are presented in Table 1. This shows a relatively even spread of both smokers and risky drinkers  
43 across the life course, except for the youngest age group (18-24 year olds) which has a greater  
44 concentration of risky drinkers. Smokers are more likely to be female and more likely to live with  
45 children or have a disability than risky drinkers. The other key distinction comes in terms of  
46 motivation to cut down or quit, with 67.4% of smokers reporting some motivation to reduce their  
47 smoking compared to only 39.4% of risky drinkers.  
48  
49  
50  
51  
52  
53  
54  
55  
56  
57  
58  
59  
60

6

Table 1 - Characteristics of survey respondents included in statistical models (unweighted)

|                                        |            | Past year smokers<br>(n=6513) | Risky drinkers<br>(n=3975) |
|----------------------------------------|------------|-------------------------------|----------------------------|
| Age, n (%)                             | 18-24      | 1051 (16.1%)                  | 877 (22.1%)                |
|                                        | 25-34      | 1222 (18.8%)                  | 539 (13.6%)                |
|                                        | 35-44      | 1052 (16.2%)                  | 572 (14.4%)                |
|                                        | 45-54      | 1126 (17.3%)                  | 741 (18.6%)                |
|                                        | 55-64      | 1046 (16.1%)                  | 643 (16.2%)                |
|                                        | 65+        | 991 (15.2%)                   | 595 (15%)                  |
|                                        | Missing    | 25 (0.4%)                     | 8 (0.2%)                   |
| Sex, n (%)                             | Male       | 3253 (49.9%)                  | 2600 (65.4%)               |
|                                        | Female     | 3260 (50.1%)                  | 1375 (34.6%)               |
|                                        | Missing    | 0 (0%)                        | 0 (0%)                     |
| Region, n (%)                          | North      | 2540 (39%)                    | 1974 (49.7%)               |
|                                        | Midlands   | 1730 (26.6%)                  | 716 (18%)                  |
|                                        | South      | 2234 (34.3%)                  | 1282 (32.3%)               |
|                                        | Missing    | 9 (0.1%)                      | 3 (0.1%)                   |
| Children in the household, n (%)       | Yes        | 4308 (66.1%)                  | 3030 (76.2%)               |
|                                        | No         | 2205 (33.9%)                  | 945 (23.8%)                |
|                                        | Missing    | 0 (0%)                        | 0 (0%)                     |
| Disability, n (%)                      | Yes        | 5121 (78.6%)                  | 3420 (86%)                 |
|                                        | No         | 1275 (19.6%)                  | 494 (12.4%)                |
|                                        | Missing    | 117 (1.8%)                    | 61 (1.5%)                  |
| Ethnicity, n (%)                       | White      | 5812 (89.2%)                  | 3813 (95.9%)               |
|                                        | Mixed race | 111 (1.7%)                    | 59 (1.5%)                  |
|                                        | Asian      | 353 (5.4%)                    | 39 (1%)                    |
|                                        | Black      | 147 (2.3%)                    | 39 (1%)                    |
|                                        | Arab/other | 61 (0.9%)                     | 10 (0.3%)                  |
|                                        | Missing    | 29 (0.4%)                     | 15 (0.4%)                  |
| Motivation to cut down smoking, n (%)  | None       | 1649 (25.3%)                  |                            |
|                                        | Moderate   | 3415 (52.4%)                  |                            |
|                                        | High       | 978 (15%)                     |                            |
|                                        | Missing    | 471 (7.2%)                    |                            |
| Risky drinker, n (%)                   | Yes        | 5004 (76.8%)                  |                            |
|                                        | No         | 1446 (22.2%)                  |                            |
|                                        | Missing    | 63 (1%)                       |                            |
| AUDIT score, n (%)                     | 8-15       |                               | 3504 (88.2%)               |
|                                        | 16-19      |                               | 251 (6.3%)                 |
|                                        | 20+        |                               | 220 (5.5%)                 |
|                                        | Missing    |                               | 0 (0%)                     |
| Motivation to cut down drinking, n (%) | None       |                               | 2372 (59.7%)               |
|                                        | Moderate   |                               | 1273 (32%)                 |
|                                        | High       |                               | 296 (7.4%)                 |
|                                        | Missing    |                               | 34 (0.9%)                  |
| Past year smoker, n (%)                | Yes        |                               | 2528 (63.6%)               |
|                                        | No         |                               | 1446 (36.4%)               |
|                                        | Missing    |                               | 1 (0%)                     |

1  
2  
3 Descriptive analyses (Table 2) show that overall, smoking was more prevalent than risky drinking  
4 (20.5% vs. 13.1% of the adult population). There were also marked socioeconomic gradients in  
5 prevalence, with smoking increasingly common in lower socioeconomic groups (e.g. 35.7% of social  
6 grade E respondents compared to 11.5% in grade AB), while the gradient in risky drinking was less  
7 stark and in the opposite direction (11.3% in grade E compared to 14.3% in grade AB). These  
8 gradients were seen most clearly for social grade, although similar patterns existed for education,  
9 but were not evident when using employment for smokers and housing tenure for drinkers. There  
10 were no clear gradients for GP attendance, although risky drinkers were more likely than smokers to  
11 have visited their GP in the past year (64.8% vs. 54.9%). Observed rates of BI receipt for those who  
12 had visited their GP (the sample used in the statistical analysis) suggest a socioeconomic gradient in  
13 BI delivery, with a greater proportion of respondents in lower SEP groups reporting that they had  
14 received a BI for both smoking and drinking. There appears, however, to be a divergence in the  
15 shape of this gradient, with BI receipt for smokers increasing linearly as SEP decreases, while the  
16 higher rates of BI receipt in risky drinkers are concentrated in the most deprived group. These  
17 patterns, for social grade, are illustrated in Figure 1.  
18  
19  
20  
21  
22  
23  
24  
25  
26  
27  
28  
29  
30  
31  
32  
33  
34  
35  
36  
37  
38  
39  
40  
41  
42  
43  
44  
45  
46  
47  
48  
49  
50  
51  
52  
53  
54  
55  
56  
57  
58  
59  
60

8

**Table 2 - Descriptive analysis of prevalence, GP attendance and BI delivery rates for smokers and risky drinkers by socioeconomic position (weighted, 95% Confidence Intervals in brackets)**

|                |            | Past year smokers        |                             |                              | Risky drinkers           |                             |                              |
|----------------|------------|--------------------------|-----------------------------|------------------------------|--------------------------|-----------------------------|------------------------------|
|                |            | Prevalence in population | Who visited GP in past year | Who received BI   visited GP | Prevalence in population | Who visited GP in past year | Who received BI   visited GP |
| Population     |            | 20.5% (20.2 to 20.9)     | 54.9% (53.8 to 56)          | 48.3% (47.1 to 49.5)         | 13.1% (12.8 to 13.3)     | 64.8% (63.6 to 65.4)        | 6.1% (5.4 to 6.5)            |
| Social grade   |            |                          |                             |                              |                          |                             |                              |
|                | AB         | 11.5% (10.9 to 12.1)     | 57.7% (54.5 to 60.9)        | 45.8% (42.3 to 49.3)         | 14.3% (13.6 to 14.6)     | 67.6% (65.1 to 68.8)        | 5.4% (4 to 6.1)              |
|                | C1         | 17.8% (17.2 to 18.4)     | 55.6% (53.4 to 57.7)        | 47% (44.6 to 49.4)           | 14.3% (13.8 to 14.6)     | 65.5% (63.5 to 66.6)        | 4.8% (3.7 to 5.3)            |
|                | C2         | 24.2% (23.4 to 25.1)     | 49.7% (47.4 to 52)          | 45.7% (43.1 to 48.3)         | 13.3% (12.7 to 13.7)     | 60.8% (58 to 62.2)          | 5% (3.4 to 5.8)              |
|                | D          | 27.8% (26.8 to 28.8)     | 53.3% (50.9 to 55.8)        | 50.3% (47.6 to 53)           | 9.7% (9.1 to 10.1)       | 65.2% (61.7 to 67)          | 6.5% (4.2 to 7.6)            |
|                | E          | 35.7% (34.4 to 37)       | 62.6% (60.1 to 65.1)        | 53.9% (51.2 to 56.6)         | 11.3% (10.4 to 11.7)     | 61.6% (57.7 to 63.6)        | 18.1% (14 to 20.1)           |
| Education      |            |                          |                             |                              |                          |                             |                              |
|                | University | 12.6% (12 to 13.1)       | 53.7% (51 to 56.3)          | 44.3% (41.3 to 47.3)         | 13.6% (13 to 13.9)       | 66.4% (64.2 to 67.6)        | 4.9% (3.7 to 5.6)            |
|                | A-level    | 21% (20.1 to 21.8)       | 53.5% (50.9 to 56)          | 48% (45.2 to 50.9)           | 18.6% (17.8 to 19)       | 59.7% (57.3 to 60.9)        | 4.7% (3.4 to 5.4)            |
|                | GCSE       | 26.1% (25.4 to 26.9)     | 54.8% (53 to 56.7)          | 47.5% (45.5 to 49.6)         | 13.1% (12.5 to 13.4)     | 65.1% (62.8 to 66.2)        | 6.6% (5.1 to 7.3)            |
|                | Other      | 18.3% (17.1 to 19.5)     | 56.8% (52.7 to 60.9)        | 49.3% (44.8 to 53.8)         | 11.4% (10.4 to 11.9)     | 70.3% (65.9 to 72.5)        | 7.9% (4.8 to 9.4)            |
|                | None       | 26.6% (25.6 to 27.5)     | 57.1% (54.7 to 59.5)        | 52.6% (50.1 to 55.2)         | 6.6% (6.1 to 6.9)        | 68.8% (64.9 to 70.8)        | 11.4% (8.2 to 13)            |
| Employment     |            |                          |                             |                              |                          |                             |                              |
|                | Full time  | 21.8% (21.2 to 22.5)     | 47.4% (45.6 to 49.3)        | 46.1% (43.9 to 48.3)         | 16.7% (16.1 to 17)       | 60.2% (58.4 to 61.2)        | 4.2% (3.2 to 4.7)            |
|                | Other      | 19.7% (19.3 to 20.1)     | 60.3% (59 to 61.7)          | 49.5% (48.1 to 51)           | 10.9% (10.6 to 11.1)     | 69% (67.5 to 69.8)          | 7.6% (6.5 to 8.1)            |
| Housing tenure |            |                          |                             |                              |                          |                             |                              |
|                | Owner      | 13.6% (13.2 to 14)       | 56.3% (54.5 to 58)          | 48% (46.1 to 49.9)           | 12.3% (11.9 to 12.5)     | 67.5% (65.9 to 68.3)        | 5.2% (4.3 to 5.7)            |
|                | Renter     | 33.7% (33 to 34.4)       | 54.3% (52.8 to 55.7)        | 48.7% (47.1 to 50.2)         | 14.9% (14.4 to 15.2)     | 60.8% (58.9 to 61.7)        | 7.7% (6.4 to 8.4)            |

*Unweighted sample sizes can be found in online supplementary Table S14*

**INSERT FIGURE 1 ABOUT HERE**

### Adjusted models for smoking

Results for the demographic-adjusted models for receipt of smoking BI (Table 3) show that older smokers had significantly greater odds of having received a BI than 18-24 year olds (e.g. OR 2.06 95% CI 1.68 to 2.51 for 65+ year olds). Significant effects were also seen for region, with smokers in the South having lower odds of receiving an intervention than those in the North (OR 0.81 95% CI 0.71 to 0.92) and for those with a self-reported disability having greater odds of receiving one than those without (OR 1.37 95% CI 1.19 to 1.57). There was no significant temporal trend in BI delivery.

The addition of behavioural factors to the model (see supplementary material Table S15 for full results) did not change the magnitude or significance of the demographic coefficients, but demonstrated that smokers who were also risky drinkers had lower odds of receiving a smoking BI (OR 0.84 95% CI 0.73 to 0.97) and that there was a strong association with both moderate (OR 1.42 95% CI 1.25 to 1.63) and high levels of motivation to cut down or quit smoking (OR 2.14 95% CI 1.79 to 2.57) and BI receipt. Finally, the addition of socioeconomic measures to the models showed significantly increased levels of BI receipt in social grades D and E compared to grade AB (OR 1.26 95% CI 1.02 to 1.55 and OR 1.30 95% CI 1.05 to 1.61 respectively). Significant increases in BI receipt were also observed in those with A-levels and no formal qualifications compared to university-level qualifications (OR 1.24 95% CI 1.02 to 1.51 and OR 1.24 95% CI 1.03 to 1.50 respectively), but no significant association employment status or housing tenure was identified.

10

**Table 3 - Logistic regression results for factors associated with likelihood of receiving Brief Intervention for smoking**

|                                |                | Demographic-adjusted model |        |              | Behavioural and Socioeconomic-adjusted models |        |              |           |        |              |           |           |              |
|--------------------------------|----------------|----------------------------|--------|--------------|-----------------------------------------------|--------|--------------|-----------|--------|--------------|-----------|-----------|--------------|
|                                |                | OR                         | 95% CI |              | OR                                            | 95% CI |              | OR        | 95% CI |              | OR        | 95% CI    |              |
| Age                            | 18-24          | Reference                  |        |              |                                               |        |              |           |        |              |           |           |              |
|                                | 25-34          | 1.39                       | ***    | 1.16 to 1.67 | 1.38                                          | **     | 1.14 to 1.68 | 1.38      | **     | 1.14 to 1.68 | 1.37      | **        | 1.13 to 1.66 |
|                                | 35-44          | 1.57                       | ***    | 1.30 to 1.90 | 1.60                                          | ***    | 1.31 to 1.96 | 1.60      | ***    | 1.31 to 1.97 | 1.57      | ***       | 1.28 to 1.93 |
|                                | 45-54          | 2.00                       | ***    | 1.66 to 2.41 | 2.03                                          | ***    | 1.67 to 2.47 | 2.03      | ***    | 1.66 to 2.48 | 2.00      | ***       | 1.64 to 2.44 |
|                                | 55-64          | 2.19                       | ***    | 1.80 to 2.66 | 2.30                                          | ***    | 1.86 to 2.83 | 2.26      | ***    | 1.82 to 2.79 | 2.23      | ***       | 1.81 to 2.75 |
|                                | 65+            | 2.06                       | ***    | 1.68 to 2.51 | 2.22                                          | ***    | 1.79 to 2.75 | 2.14      | ***    | 1.71 to 2.67 | 2.11      | ***       | 1.70 to 2.62 |
| Gender                         | Male           | Reference                  |        |              |                                               |        |              |           |        |              |           |           |              |
|                                | Female         | 1.01                       |        | 0.91 to 1.13 | 0.95                                          |        | 0.84 to 1.07 | 0.97      |        | 0.86 to 1.09 | 0.96      |           | 0.85 to 1.08 |
| Region                         | North          | Reference                  |        |              |                                               |        |              |           |        |              |           |           |              |
|                                | Midlands       | 0.94                       |        | 0.82 to 1.08 | 0.93                                          |        | 0.81 to 1.08 | 0.93      |        | 0.80 to 1.07 | 0.93      |           | 0.81 to 1.07 |
|                                | South          | 0.81                       | **     | 0.71 to 0.92 | 0.79                                          | **     | 0.69 to 0.91 | 0.79      | ***    | 0.69 to 0.90 | 0.78      | ***       | 0.68 to 0.89 |
| Children in the household      | None           | Reference                  |        |              |                                               |        |              |           |        |              |           |           |              |
|                                | ≥1             | 1.14                       |        | 0.99 to 1.30 | 1.07                                          |        | 0.93 to 1.23 | 1.08      |        | 0.93 to 1.24 | 1.08      |           | 0.94 to 1.24 |
| Self-reported disability       | No             | Reference                  |        |              |                                               |        |              |           |        |              |           |           |              |
|                                | Yes            | 1.37                       | ***    | 1.19 to 1.57 | 1.33                                          | ***    | 1.14 to 1.55 | 1.38      | ***    | 1.19 to 1.59 | 1.38      | ***       | 1.19 to 1.60 |
| Ethnicity                      | White          | Reference                  |        |              |                                               |        |              |           |        |              |           |           |              |
|                                | Mixed race     | 0.92                       |        | 0.60 to 1.39 | 0.85                                          |        | 0.54 to 1.34 | 0.87      |        | 0.56 to 1.36 | 0.87      |           | 0.56 to 1.35 |
|                                | Asian          | 0.92                       |        | 0.72 to 1.18 | 0.84                                          |        | 0.65 to 1.09 | 0.87      |        | 0.67 to 1.12 | 0.86      |           | 0.67 to 1.11 |
|                                | Black          | 1.20                       |        | 0.83 to 1.72 | 0.98                                          |        | 0.67 to 1.46 | 1.01      |        | 0.68 to 1.49 | 1.01      |           | 0.68 to 1.49 |
|                                | Arab/other     | 0.95                       |        | 0.55 to 1.63 | 0.94                                          |        | 0.52 to 1.69 | 0.93      |        | 0.52 to 1.68 | 0.93      |           | 0.52 to 1.66 |
| Time trend (monthly)           |                | 1.00                       |        | 0.99 to 1.01 | 1.00                                          |        | 0.99 to 1.01 | 1.00      |        | 1.00 to 1.01 | 1.00      |           | 1.00 to 1.01 |
| Risky drinker (AUDIT 8+)       | No             |                            |        |              |                                               |        |              |           |        |              |           |           |              |
|                                | Yes            |                            |        |              | 0.86                                          | *      | 0.75 to 0.99 | 0.85      | *      | 0.74 to 0.98 | 0.85      | *         | 0.73 to 0.97 |
| Motivation to cut down smoking | None           |                            |        |              |                                               |        |              |           |        |              |           |           |              |
|                                | Moderate       |                            |        |              | 1.44                                          | ***    | 1.26 to 1.64 | 1.44      | ***    | 1.26 to 1.64 | 1.43      | ***       | 1.25 to 1.63 |
|                                | High           |                            |        |              | 2.19                                          | ***    | 1.83 to 2.63 | 2.16      | ***    | 1.80 to 2.59 | 2.15      | ***       | 1.79 to 2.58 |
| Social grade                   | AB             | Reference                  |        |              |                                               |        |              |           |        |              |           |           |              |
|                                | C1             |                            |        |              | 1.08                                          |        | 0.88 to 1.32 |           |        |              |           |           |              |
|                                | C2             |                            |        |              | 0.96                                          |        | 0.78 to 1.17 |           |        |              |           |           |              |
|                                | D              |                            |        |              | 1.26                                          | *      | 1.02 to 1.55 |           |        |              |           |           |              |
|                                | E              |                            |        |              | 1.30                                          | *      | 1.05 to 1.61 |           |        |              |           |           |              |
| Education                      | University     |                            |        |              |                                               |        |              | Reference |        |              |           |           |              |
|                                | A-level        |                            |        |              |                                               |        |              | 1.24      | *      | 1.02 to 1.51 |           |           |              |
|                                | GCSE           |                            |        |              |                                               |        |              | 1.16      |        | 0.98 to 1.38 |           |           |              |
|                                | Other          |                            |        |              |                                               |        |              | 1.20      |        | 0.93 to 1.56 |           |           |              |
| Employment status              | None           |                            |        |              |                                               |        |              | 1.24      | *      | 1.03 to 1.50 |           |           |              |
|                                | Full-time      |                            |        |              |                                               |        |              |           |        |              | Reference |           |              |
| Employment status              | Other          |                            |        |              |                                               |        |              |           |        |              | 1.05      |           | 0.92 to 1.20 |
|                                | Housing tenure | Owned                      |        |              |                                               |        |              |           |        |              |           | Reference |              |

1  
2  
3  
4  
5  
6  
7  
8  
9  
10  
11  
12  
13  
14  
15  
16  
17  
18  
19  
20  
21  
22  
23  
24  
25  
26  
27  
28  
29  
30  
31  
32  
33  
34  
35  
36  
37  
38  
39  
40  
41  
42  
43  
44  
45  
46  
47

11

|          |        |      |              |      |    |              |      |    |              |      |              |              |      |    |              |
|----------|--------|------|--------------|------|----|--------------|------|----|--------------|------|--------------|--------------|------|----|--------------|
|          | Rented |      |              |      |    |              |      |    |              | 1.10 | 0.97 to 1.25 |              |      |    |              |
| Constant |        | 0.49 | 0.24 to 1.02 | 0.34 | ** | 0.15 to 0.75 | 0.31 | ** | 0.14 to 0.69 | 0.36 | *            | 0.17 to 0.78 | 0.35 | ** | 0.16 to 0.76 |

For peer review only



### Adjusted models for risky drinking

Results for the demographic-adjusted logistic regression models for alcohol BIs (Table 4) showed a similar age gradient to the smoking models, with all risky drinkers aged 35+ having odds at least twice as high of having received a BI as those under 24 (e.g. OR 2.68 95% CI 1.53 to 4.71 for 65+ year olds). Unlike for smoking, there was a significant gender effect, with women having lower odds of receiving an intervention (OR 0.68 95% CI 0.49 to 0.93). There were no significant effects for region, or time, but again, disability was a significant predictor of BI receipt (OR 3.47 95% CI 2.54 to 4.74).

The addition of behavioural factors to the model (see supplementary material Table S16 for full results) substantially increased the slope of the age gradient, with the OR for over 65s compared to 18-24 year-olds increasing to 5.00 (95% CI 2.71 to 9.23). The effect of disability was reduced, although still significant (OR 2.27 95% CI 1.57 to 3.27) and we saw an additional significant effect for Arab/other ethnic groups compared to the White group (OR 8.64 95% CI 1.81 to 41.21). Of the additional explanatory factors, smoking did not significantly predict BI receipt for alcohol, but motivation to reduce drinking did, with both moderate (OR 2.85 95% CI 2.00 to 4.05) and high levels (OR 5.17 95% CI 3.29 to 8.14) significantly associated with BI receipt. Level of alcohol use was also a very strong predictor of BI receipt, with high risk drinkers having almost 3 times the odds of having received a BI (OR 2.94 95% CI 1.81 to 4.79) and potentially dependent drinkers almost 12 times the odds (OR 11.84 95% CI 7.77 to 18.04).

Adding socioeconomic factors to the model did not further change the magnitude or significance of the other coefficients, but we saw a significant increase in BI receipt for the lowest social grade (E) compared to the highest (OR 2.11 95% CI 1.27 to 3.52). There was no significant effect of education, but not being in full-time employment (OR 1.56 95% CI 1.08 to 2.25) and not being a homeowner (OR 1.55 95% CI 1.09 to 2.20) significantly increased the likelihood of receiving a BI. The effects of all four socioeconomic measures on both smoking and alcohol BI receipt are illustrated in Figure 2, highlighting the relatively larger scale of the socioeconomic gradients for alcohol compared to smoking.

Table 4 - Logistic regression results for factors associated with likelihood of receiving Brief Intervention for risky drinking

|                                 |            | Demographic-adjusted model |                  | Behavioural and Socioeconomic-adjusted models |                  |      |                  |      |                  |      |                  |  |  |
|---------------------------------|------------|----------------------------|------------------|-----------------------------------------------|------------------|------|------------------|------|------------------|------|------------------|--|--|
|                                 |            | OR                         | 95% CI           | OR                                            | 95% CI           | OR   | 95% CI           | OR   | 95% CI           | OR   | 95% CI           |  |  |
| Age                             | 18-24      | Reference                  |                  |                                               |                  |      |                  |      |                  |      |                  |  |  |
|                                 | 25-34      | 1.56                       | 0.84 to 2.89     | 1.46                                          | 0.77 to 2.78     | 1.46 | 0.76 to 2.80     | 1.60 | 0.82 to 3.14     | 1.51 | 0.79 to 2.85     |  |  |
|                                 | 35-44      | 2.49                       | ** 1.39 to 4.47  | 2.05                                          | * 1.09 to 3.86   | 2.14 | * 1.13 to 4.07   | 2.42 | ** 1.26 to 4.64  | 2.32 | ** 1.23 to 4.36  |  |  |
|                                 | 45-54      | 2.74                       | *** 1.63 to 4.62 | 2.86                                          | *** 1.62 to 5.07 | 2.98 | *** 1.65 to 5.39 | 3.33 | *** 1.86 to 5.97 | 3.43 | *** 1.95 to 6.01 |  |  |
|                                 | 55-64      | 2.26                       | ** 1.30 to 3.93  | 3.23                                          | *** 1.76 to 5.92 | 3.20 | *** 1.71 to 5.99 | 3.24 | *** 1.77 to 5.93 | 3.93 | *** 2.11 to 7.33 |  |  |
|                                 | 65+        | 2.68                       | ** 1.53 to 4.71  | 4.94                                          | *** 2.66 to 9.15 | 4.74 | *** 2.50 to 9.02 | 4.41 | *** 2.41 to 8.08 | 6.11 | *** 3.25 to 11.5 |  |  |
| Gender                          | Male       | Reference                  |                  |                                               |                  |      |                  |      |                  |      |                  |  |  |
|                                 | Female     | 0.68                       | * 0.49 to 0.93   | 0.62                                          | ** 0.43 to 0.89  | 0.65 | * 0.45 to 0.92   | 0.60 | ** 0.42 to 0.85  | 0.64 | * 0.45 to 0.91   |  |  |
| Region                          | North      | Reference                  |                  |                                               |                  |      |                  |      |                  |      |                  |  |  |
|                                 | Midlands   | 1.21                       | 0.84 to 1.73     | 1.20                                          | 0.81 to 1.77     | 1.18 | 0.80 to 1.75     | 1.19 | 0.80 to 1.77     | 1.20 | 0.81 to 1.78     |  |  |
|                                 | South      | 0.85                       | 0.62 to 1.16     | 0.84                                          | 0.58 to 1.20     | 0.83 | 0.58 to 1.18     | 0.78 | 0.55 to 1.11     | 0.80 | 0.56 to 1.15     |  |  |
| Children in the household       | None       | Reference                  |                  |                                               |                  |      |                  |      |                  |      |                  |  |  |
|                                 | ≥1         | 0.79                       | 0.53 to 1.17     | 1.06                                          | 0.69 to 1.64     | 1.06 | 0.69 to 1.62     | 1.06 | 0.69 to 1.64     | 1.08 | 0.70 to 1.65     |  |  |
| Self-reported disability        | No         | Reference                  |                  |                                               |                  |      |                  |      |                  |      |                  |  |  |
|                                 | Yes        | 3.47                       | *** 2.54 to 4.74 | 1.97                                          | ** 1.34 to 2.90  | 2.16 | *** 1.49 to 3.14 | 2.09 | *** 1.42 to 3.06 | 2.09 | *** 1.43 to 3.04 |  |  |
| Ethnicity                       | White      | Reference                  |                  |                                               |                  |      |                  |      |                  |      |                  |  |  |
|                                 | Mixed race | 2.20                       | 0.73 to 6.60     | 2.29                                          | 0.72 to 7.32     | 2.14 | 0.68 to 6.71     | 2.17 | 0.72 to 6.52     | 2.09 | 0.71 to 6.17     |  |  |
|                                 | Asian      | 3.44                       | 0.98 to 12.0     | 3.18                                          | 0.66 to 15.4     | 3.47 | 0.69 to 17.4     | 3.47 | 0.70 to 17.2     | 3.17 | 0.65 to 15.5     |  |  |
|                                 | Black      | 0.35                       | 0.07 to 1.86     | 0.17                                          | 0.02 to 1.31     | 0.19 | 0.02 to 1.63     | 0.17 | 0.02 to 1.54     | 0.18 | 0.02 to 1.51     |  |  |
|                                 | Arab/other | 4.41                       | 0.95 to 20.4     | 9.58                                          | ** 1.98 to 46.4  | 8.29 | ** 1.70 to 40.4  | 8.02 | * 1.51 to 42.5   | 8.78 | ** 1.77 to 43.5  |  |  |
| Time trend (monthly)            |            | 1.00                       | 0.99 to 1.02     | 1.00                                          | 0.98 to 1.02     | 1.00 | 0.98 to 1.02     | 1.00 | 0.98 to 1.02     | 1.00 | 0.98 to 1.02     |  |  |
| Past year smoker                | No         | Reference                  |                  |                                               |                  |      |                  |      |                  |      |                  |  |  |
|                                 | Yes        |                            |                  | 1.09                                          | 0.79 to 1.52     | 1.17 | 0.84 to 1.62     | 1.16 | 0.84 to 1.62     | 1.07 | 0.77 to 1.49     |  |  |
| Motivation to cut down drinking | None       | Reference                  |                  |                                               |                  |      |                  |      |                  |      |                  |  |  |
|                                 | Moderate   |                            |                  | 2.94                                          | *** 2.06 to 4.20 | 2.91 | *** 2.03 to 4.17 | 2.85 | *** 2.00 to 4.06 | 2.93 | *** 2.06 to 4.18 |  |  |
|                                 | High       |                            |                  | 5.26                                          | *** 3.33 to 8.30 | 5.27 | *** 3.34 to 8.32 | 5.01 | *** 3.18 to 7.90 | 5.18 | *** 3.29 to 8.14 |  |  |
| AUDIT Score                     | 8-15       | Reference                  |                  |                                               |                  |      |                  |      |                  |      |                  |  |  |
|                                 | 16-19      |                            |                  | 2.77                                          | *** 1.68 to 4.56 | 2.81 | *** 1.72 to 4.59 | 2.88 | *** 1.76 to 4.73 | 2.86 | *** 1.75 to 4.69 |  |  |
|                                 | 20+        |                            |                  | 10.9                                          | *** 7.12 to 16.6 | 11.7 | *** 7.67 to 17.7 | 11.5 | *** 7.54 to 17.6 | 11.4 | *** 7.47 to 17.5 |  |  |
| Social grade                    | AB         | Reference                  |                  |                                               |                  |      |                  |      |                  |      |                  |  |  |
|                                 | C1         |                            |                  | 0.97                                          | 0.63 to 1.49     |      |                  |      |                  |      |                  |  |  |
|                                 | C2         |                            |                  | 0.84                                          | 0.51 to 1.36     |      |                  |      |                  |      |                  |  |  |
|                                 | D          |                            |                  | 1.20                                          | 0.68 to 2.10     |      |                  |      |                  |      |                  |  |  |
|                                 | E          |                            |                  | 2.11                                          | ** 1.27 to 3.52  |      |                  |      |                  |      |                  |  |  |
| Education                       | University | Reference                  |                  |                                               |                  |      |                  |      |                  |      |                  |  |  |
|                                 | A-level    |                            |                  |                                               |                  | 1.10 | 0.68 to 1.79     |      |                  |      |                  |  |  |
|                                 | GCSE       |                            |                  |                                               |                  | 1.12 | 0.73 to 1.71     |      |                  |      |                  |  |  |
|                                 | Other      |                            |                  |                                               |                  | 1.48 | 0.80 to 2.72     |      |                  |      |                  |  |  |
|                                 | None       |                            |                  |                                               |                  | 1.45 | 0.86 to 2.44     |      |                  |      |                  |  |  |
| Employment status               | Full-time  | Reference                  |                  |                                               |                  |      |                  |      |                  |      |                  |  |  |
|                                 | Other      |                            |                  |                                               |                  | 1.56 | * 1.08 to 2.25   |      |                  |      |                  |  |  |
| Housing tenure                  | Owned      | Reference                  |                  |                                               |                  |      |                  |      |                  |      |                  |  |  |
|                                 | Rented     |                            |                  |                                               |                  |      |                  |      |                  | 1.55 | * 1.09 to 2.20   |  |  |

1  
2  
3  
4  
5  
6  
7  
8  
9  
10  
11  
12  
13  
14  
15  
16  
17  
18  
19  
20  
21  
22  
23  
24  
25  
26  
27  
28  
29  
30  
31  
32  
33  
34  
35  
36  
37  
38  
39  
40  
41  
42  
43  
44  
45  
46  
47

14

|          |      |    |              |      |     |              |      |     |              |      |     |              |      |     |              |
|----------|------|----|--------------|------|-----|--------------|------|-----|--------------|------|-----|--------------|------|-----|--------------|
| Constant | 0.04 | ** | 0.01 to 0.27 | 0.01 | *** | 0.00 to 0.08 | 0.01 | *** | 0.00 to 0.07 | 0.01 | *** | 0.00 to 0.07 | 0.01 | *** | 0.00 to 0.06 |
|----------|------|----|--------------|------|-----|--------------|------|-----|--------------|------|-----|--------------|------|-----|--------------|

INSERT FIGURE 2 ABOUT HERE

For peer review only

## DISCUSSION

Our findings show that there is a socioeconomic gradient in BI delivery for both smokers and risky drinkers, with those in the lowest socioeconomic groups more likely to receive an intervention, although there is considerable uncertainty around the exact slope of this gradient. This gradient is not accounted for by differences in demographic characteristics or smoking and drinking behaviour and appears to be stronger for alcohol than for smoking. The analysis also illustrates that, despite clinical guidelines recommending BI for both smokers and risky drinkers, an individual who has attended primary care in the past year is 8 times more likely to report receiving an intervention if they are a smoker compared to a risky drinker. For both smoking and drinking there is a clear age gradient, with greater levels of BI delivery in older age groups, in spite of the fact that the highest rates of prevalence of risky drinking being in the youngest age group. Perhaps surprisingly, smokers who were also risky drinkers were less likely to have received a BI for their smoking than those who were not. The very heaviest drinkers, consuming at potentially dependent levels, are almost 12 times more likely to have received an alcohol intervention than those drinking at lower, but still risky, levels. These findings were robust to alternative data assumptions (see supplementary material).

Our study represents, to the best of our knowledge, the first detailed exploration of the potential of BIs for both smoking and alcohol to reduce, or increase, inequalities in health. We used data from a large, nationally representative survey and our findings are based on patients' own reporting of having received an intervention. Whilst such a measure may be subject to recall bias, it likely provides a better indicator of patient experience than routine data recorded by practitioners [33] and is not subject to known biases in practitioner recording [34]. We explored multiple measures of socioeconomic position, finding similar results across all measures, although the effect of increased BI delivery appears more closely associated with low social grade than low levels of education.

There are several important limitations to our study which should be considered alongside our findings. Firstly, our definition of what constitutes a BI is fairly broad, including anyone who reported receiving advice from a primary care practitioner and that there may be unobserved inequalities in the extent to which different groups receive different intensities of intervention or in the quality of content or delivery of the BI. Secondly, patient characteristics, including drinking/smoking status and motivation to cut down or quit, are recorded after the BI has taken place. As a result, we cannot establish whether the strong association between motivation and likelihood of BI receipt is a function of treatment-seeking behaviour in patients who are already motivated to reduce their smoking or drinking, of motivation increasing after receipt of a BI, or of more motivated patients being more likely to recall having received an intervention. Finally, whilst smoking rates in the Toolkit data are very similar to those reported in other national surveys [35], the observed prevalence of risky drinking of 13.1% is substantially lower than other estimates (e.g. 19.7% in the 2014 Adult Psychiatric Morbidity Survey [36]), although it is unclear what effect, if any, this may have on the study results.

Two, much smaller, UK studies conducted in 1996 looked at the relationship between occupation and rates of alcohol BI receipt in risky drinkers, finding no clear socioeconomic gradient [37,38]. Another, Finnish study also found no significant association [39], perhaps suggesting that socioeconomic gradients in BI delivery may not be consistent across different contexts. Previous studies have found similar disparities to those we find between delivery rates of BI for smoking and risky drinking [17,40], as well as similarly higher levels of BI receipt among primary care patients at older ages [41], with greater motivation to quit or cut down [42] and for risky drinkers with higher AUDIT scores [43]. Numerous explanations for the relatively low rate of BI delivery for risky drinking have been suggested, including a lack of training and resources and the attitudes and beliefs of both practitioners and patients [44–46].

1  
2  
3 It is not clear why BI delivery appeared highest in lower socioeconomic groups after adjustment for a range of  
4 socio-demographic, drinking and smoking characteristics. Presenting with a chronic disease – likely related to  
5 smoking or alcohol – is associated with receipt of brief intervention [17]. The underlying reason for the GP visit  
6 was not recorded in the current study but it is possible that smoking or alcohol-related illness is more likely to  
7 present in low compared with high SEP smokers or risky drinkers respectively [47].  
8

9  
10 Our analysis focuses on the receipt of Brief Interventions for patients who reported attending Primary Care in the  
11 past year. There are likely to be additional socioeconomic gradients in terms of access to, use of and quality of  
12 Primary Care services which will moderate any overall impact of BIs on health inequalities [48–51]. We should  
13 also consider the potential for differential effectiveness of the intervention across socioeconomic groups. If BIs  
14 are more effective at changing the behaviour of those in higher SEP groups then this may mitigate any potential  
15 inequality-reducing effects. There is little evidence to support the existence of such a gradient in effectiveness for  
16 alcohol [52], although there is some suggestion that this may be in part because lower SEP groups are more likely  
17 to drop out of BI trials [53]. For smoking, a recent study does suggest there may be some degree of inequality in  
18 longer term outcomes for smoking cessation interventions [54]. A holistic view of the full impact of SBI  
19 programmes should consider the impact of these potential SEP gradients, which may attenuate the positive  
20 gradients identified in the present study, alongside existing negative gradients in alcohol- and tobacco-related  
21 harm. Such is the severity of these gradients in harm, with those in the lowest SEP groups experiencing rates of  
22 harm several times greater than those in the highest groups even after adjusting for drinking and smoking  
23 behaviour [8,55], that an intervention could have a negative SEP gradient in terms of its effects on alcohol  
24 consumption and/or smoking, while still reducing overall inequalities. Further research in this area is urgently  
25 needed to understand the full impact that BI programmes may be having on socioeconomic inequalities. This  
26 need is particularly acute given NHS England's recent decision to incentivise secondary care providers to deliver  
27 large scale Brief Intervention programmes for both smoking and risky drinking under the latest Commissioning for  
28 Quality and Innovation (CQUIN) scheme. Although similar gradients in the prevalence of both smoking and risky  
29 drinking as well as associated harm have been observed in many countries [56,57], primary care systems can vary  
30 widely and it is therefore unclear how generalisable our findings are beyond England. Future research into this  
31 area, particularly in Low and Middle Income Countries, could help design SBI programmes to maximise their  
32 potential to reduce inequalities in health.  
33  
34  
35

36  
37 These findings provide the first evidence that Brief Intervention programmes may help reduce inequalities in  
38 smoking- and alcohol-related health although better evidence is needed on the extent to which conflicting  
39 socioeconomic gradients in delivery and, potentially, intervention effectiveness interact with existing gradients in  
40 health. There is considerable scope for the potential effect on inequalities to be increased if intervention rates  
41 can be raised, particularly for drinking.  
42

#### 43 **Author Contributions**

44  
45 CA conceived of and designed the study with input from JB, EB, DG, PB, EK, SM & PM. CA performed the analysis  
46 and wrote the first draft of the paper. All authors commented on this and subsequent versions and read and  
47 approved the final manuscript.  
48

#### 49 **Funding**

50  
51 This work was supported by a research innovation grant from Alcohol Research UK (R2016/01). The ATS is funded  
52 by the National Institute for Health Research (NIHR)'s School for Public Health Research (SPHR). The views are  
53 those of the author(s) and not necessarily those of the NHS, the NIHR or the Department of Health. SPHR is a  
54 partnership between the Universities of Sheffield; Bristol; Cambridge; Exeter; UCL; The London School for Hygiene  
55 and Tropical Medicine; the LiLaC collaboration between the Universities of Liverpool and Lancaster and Fuse; The  
56  
57  
58  
59

17

1  
2  
3 Centre for Translational Research in Public Health, a collaboration between Newcastle, Durham, Northumbria,  
4 Sunderland and Teesside Universities. The Smoking Toolkit Study is currently primarily funded by Cancer Research  
5 UK (C1417/A14135; C36048/A11654; C44576/A19501), and has previously also been funded by Pfizer,  
6 GlaxoSmithKline and the Department of Health. JB's post is funded by a fellowship from the Society for the Study  
7 of Addiction, and Cancer Research UK also provide support (C1417/A14135).  
8

#### 9 **Disclaimer**

10 The views are those of the author(s) and not necessarily those of the NHS, NIHR or the Department of Health  
11

#### 12 **Declaration of Interests**

13  
14 CA, EB and PB's salaries are funded or part-funded by the National Institute for Health Research (NIHR)'s School  
15 for Public Health Research (SPHR) and all have received funding from Cancer Research UK (CRUK); EK is a senior  
16 investigator in SPHR. JB is funded by CRUK and the Society for the Study of Addiction; SM is funded by CRUK. CA  
17 has received funding related to commissioned research from Systembolaget, the Swedish government-owned  
18 alcohol retail monopoly. CA and PM have received funding related to commissioned research from Alko, the  
19 Finnish government-owned alcohol retail monopoly. JB and EB have both received unrestricted research funding  
20 from Pfizer relating to smoking cessation studies.  
21  
22

#### 23 **Ethics approval**

24 Ethical approval for the Smoking Toolkit Study (STS) was originally granted by the UCL Ethics Committee (ID  
25 0498/001). Approval for the ATS was granted by the same committee as an extension of the STS. The data were  
26 collected by Ipsos Mori and anonymised when received by study authors. Explicit verbal agreement and  
27 willingness to answer questions voluntarily were recorded electronically by Ipsos Mori. Participants were also  
28 given a printed information sheet. This standard was agreed by the UCL ethics committee.  
29  
30

#### 31 **Data sharing statement**

32 The dataset analysed during the current study are available from the corresponding author on reasonable request.  
33  
34  
35  
36  
37  
38  
39  
40  
41  
42  
43  
44  
45  
46  
47  
48  
49  
50  
51  
52  
53  
54  
55  
56  
57  
58  
59  
60

## REFERENCES

- 1 Forouzanfar MH, Afshin A, Alexander LT, *et al*. Global, regional, and national comparative risk assessment of 79 behavioural, environmental and occupational, and metabolic risks or clusters of risks, 1990–2015: a systematic analysis for the Global Burden of Disease Study 2015. *Lancet* 2016;**388**:1659–724. doi:10.1016/S0140-6736(16)31679-8
- 2 Siegler V, Al-Hamad A, B J, *et al*. Social inequalities in alcohol-related adult mortality by National Statistics Socio-economic Classifications, England and Wales 2001-03. *Heal Stat Q* 2011;**50**.<http://www.ons.gov.uk/ons/rel/hsq/health-statistics-quarterly/no--50--summer-2011/social-inequalities-in-alcohol-related-adult-mortality-by-national-statistics-socio-economic-classification--england-and-wales--2001-03.pdf>
- 3 Marmot M. Fair society, healthy lives, the Marmot review. 2010. <http://www.instituteofhealthequity.org/projects/fair-society-healthy-lives-the-marmot-review>
- 4 Hiscock R, Bauld L, Amos A, *et al*. Socioeconomic status and smoking: a review. *Ann N Y Acad Sci* 2012;**1248**:107–23. doi:10.1111/j.1749-6632.2011.06202.x
- 5 Holmes J, Meng Y, Meier PS, *et al*. Effects of minimum unit pricing for alcohol on different income and socioeconomic groups: a modelling study. *Lancet* 2014;**383**:1655–64. doi:10.1016/S0140-6736(13)62417-4
- 6 Lewer D, Meier P, Beard E, *et al*. Unravelling the alcohol harm paradox: a population-based study of social gradients across very heavy drinking thresholds. *BMC Public Health* 2016;**16**:599. doi:10.1186/s12889-016-3265-9
- 7 Bellis MA, Hughes K, Nicholls J, *et al*. The alcohol harm paradox: using a national survey to explore how alcohol may disproportionately impact health in deprived individuals. *BMC Public Health* 2016;**16**:111. doi:10.1186/s12889-016-2766-x
- 8 Katikireddi SV, Whitley E, Lewsey J, *et al*. Socioeconomic status as an effect modifier of alcohol consumption and harm: analysis of linked cohort data. *Lancet Public Heal* Published Online First: May 2017. doi:10.1016/S2468-2667(17)30078-6
- 9 Beard E, Brown J, West R, *et al*. Deconstructing the Alcohol Harm Paradox: A population based survey of adults in England. *PLoS One* 2016;**11**:e0160666. doi:10.1371/journal.pone.0160666
- 10 Stead L, Bergson G, Lancaster T. Physician advice for smoking cessation. *Cochrane Libr* Published Online First: 2008.<http://onlinelibrary.wiley.com/doi/10.1002/14651858.CD000165.pub3/full>
- 11 Aveyard P, Begh R, Parsons A, *et al*. Brief opportunistic smoking cessation interventions: a systematic review and meta-analysis to compare advice to quit and offer of assistance. *Addiction* Published Online First: 2012.<http://onlinelibrary.wiley.com/doi/10.1111/j.1360-0443.2011.03770.x/full>
- 12 Kaner EF, Beyer FR, Muirhead C, *et al*. Effectiveness of brief alcohol interventions in primary care populations. *Cochrane Database Syst Rev* Published Online First: 24 February 2018. doi:10.1002/14651858.CD004148.pub4
- 13 Angus C, Latimer N, Preston L, *et al*. What are the implications for policy makers? A systematic review of the cost-effectiveness of screening and brief interventions for alcohol misuse in primary care. *Front. Psychiatry*. 2014;**5**. doi:10.3389/fpsy.2014.00114
- 14 National Institute of Health and Clinical Excellence (NICE). Stop smoking interventions and services: NICE guideline [NG92]. 2018.<https://www.nice.org.uk/guidance/ng92>
- 15 National Institute of Health and Clinical Excellence (NICE). PH24 Alcohol-use disorders: preventing harmful drinking. 2010. [www.nice.org.uk/guidance/ph24](http://www.nice.org.uk/guidance/ph24)
- 16 Department of Health, Public Health England. NHS health check programme: best practice guidance. London: 2013. <http://www.healthcheck.nhs.uk/document.php?o=456>
- 17 Taggar JS, Coleman T, Lewis S, *et al*. The impact of the Quality and Outcomes Framework (QOF) on the recording of smoking targets in primary care medical records: cross-sectional analyses from The Health Improvement Network (THIN) database. *BMC Public Health* 2012;**12**:329. doi:10.1186/1471-2458-12-329
- 18 Brown J, West R, Angus C, *et al*. Comparison of brief interventions in primary care on smoking and excessive alcohol consumption: A population survey in England. *Br J Gen Pract* 2016;**66**:e1–9. doi:10.3399/bjgp16X683149
- 19 Anderson P, Bendtsen P, Spak F, *et al*. Improving the delivery of brief interventions for heavy drinking in

19

- 1  
2  
3 primary health care: outcome results of the Optimizing Delivery of Health Care Intervention (ODHIN) five-  
4 country cluster randomized factorial trial. *Addiction* Published Online First: 2016. doi:10.1111/add.13476
- 5 20 Denny CH, Hungerford DW, McKnight-Eily LR, *et al.* Self-Reported Prevalence of Alcohol Screening Among  
6 U.S. Adults. *Am J Prev Med* 2016;**50**:380–3. doi:10.1016/j.amepre.2015.09.016
- 7 21 Rehm J, Allamani A, Della Vedova R, *et al.* General practitioners recognizing alcohol dependence: a large  
8 cross-sectional study in 6 European countries. *Ann Fam Med* 2015;**13**:28–32. doi:10.1370/afm.1742
- 9 22 Lorenc T, Petticrew M, Welch V, *et al.* What types of interventions generate inequalities? Evidence from  
10 systematic reviews. *J Epidemiol Community Health* 2013;**67**:190–3. doi:10.1136/jech-2012-201257
- 11 23 White M, Heywood P. How and why do interventions that increase health overall widen inequalities within  
12 populations? In: Babones S, ed. *Health, Inequality and society*. Bristol: : Policy Press 2009.
- 13 24 Beard E, Brown J, West R, *et al.* Protocol for a national monthly survey of alcohol use in England with 6-  
14 month follow-up: 'The Alcohol Toolkit Study'. *BMC public* Published Online First:  
15 2015.<http://bmcpublihealth.biomedcentral.com/articles/10.1186/s12889-015-1542-7>
- 16 25 Fidler J, Shahab L, West O. 'The smoking toolkit study': a national study of smoking and smoking cessation  
17 in England. *BMC Public* Published Online First:  
18 2011.<http://bmcpublihealth.biomedcentral.com/articles/10.1186/1471-2458-11-479>
- 19 26 Babor TF, Higgins-Biddle JC, Saunders JB, *et al.* *The Alcohol Use Disorders Identification Test Guidelines for*  
20 *Use in Primary Care*. World Health Organization 2001. doi:10.1177/0269881110393051
- 21 27 Collis D. Social grade: A classification tool - Bite sized thought piece. 2009. [https://www.ipsos-](https://www.ipsos-mori.com/DownloadPublication/1285_MediaCT_thoughtpiece_Social_Grade_July09_V3_WEB.pdf)  
22 [mori.com/DownloadPublication/1285\\_MediaCT\\_thoughtpiece\\_Social\\_Grade\\_July09\\_V3\\_WEB.pdf](https://www.ipsos-mori.com/DownloadPublication/1285_MediaCT_thoughtpiece_Social_Grade_July09_V3_WEB.pdf)
- 23 28 Graham JW, Olchowski AE, Gilreath TD. How many imputations are really needed? Some practical  
24 clarifications of multiple imputation theory. *Prev Sci* 2007;**8**:206–13. doi:10.1007/s1121-007-0070-9
- 25 29 Rubin DB. Multiple Imputation after 18+ Years. *J Am Stat Assoc* 1996;**91**:473–89.  
26 doi:10.1080/01621459.1996.10476908
- 27 30 StataCorp. Stata Statistical Software: Release 12. 2011.
- 28 31 Box GEP, Tidwell PW. Transformation of the Independent Variables. *Technometrics* 1962;**4**:531.  
29 doi:10.2307/1266288
- 30 32 Vandenberg JP, Von Elm E, Altman DG, *et al.* Strengthening the Reporting of Observational Studies in  
31 Epidemiology (STROBE): Explanation and elaboration. *Ann. Intern. Med.* 2007;**147**:806–8.  
32 doi:10.1136/bmj.39335.541782.AD
- 33 33 Wilson A, McDonald P. Comparison of patient questionnaire, medical record, and audio tape in  
34 assessment of health promotion in general practice consultations. *BMJ* 1994;**309**:1483–  
35 5.<http://www.ncbi.nlm.nih.gov/pubmed/7804055> (accessed 21 Nov 2016).
- 36 34 Szatkowski L, Mcneill A, Lewis S, *et al.* A comparison of patient recall of smoking cessation advice with  
37 advice recorded in electronic medical records. doi:10.1186/1471-2458-11-291
- 38 35 Health and Social Care Information Centre. Health Survey for England 2014. 2015.
- 39 36 Office for National Statistics. Adult Psychiatric Morbidity Survey 2014. 2016.
- 40 37 Kaner EF, Heather N, Brodie J, *et al.* Patient and practitioner characteristics predict brief alcohol  
41 intervention in primary care. *Br J Gen Pract* 2001;**51**:822–  
42 7.<http://www.ncbi.nlm.nih.gov/pubmed/11677706> (accessed 17 Nov 2016).
- 43 38 Lock CA, Kaner EFS. Implementation of brief alcohol interventions by nurses in primary care: do non-  
44 clinical factors influence practice? *Fam Pract* 2004;**21**:270–5. doi:10.1093/FAMPRA/CMH310
- 45 39 Mäkelä P, Havio M, Seppä K. Alcohol-related discussions in health care—a population view. *Addiction*  
46 2011;**106**:1239–48. doi:10.1111/j.1360-0443.2010.03356.x
- 47 40 Khadjesari Z, Marston L, Petersen I, *et al.* Alcohol consumption screening of newly-registered patients in  
48 primary care: a cross-sectional analysis. *Br J Gen Pract* 2013;**63**:e706-12. doi:10.3399/bjgp13X673720
- 49 41 Denny CH, Serdula MK, Holtzman D, *et al.* Physician advice about smoking and drinking: Are U.S. adults  
50 being informed? *Am J Prev Med* 2003;**24**:71–4. doi:10.1016/S0749-3797(02)00568-8
- 51 42 Kotz D, Fidler J, West R. Factors associated with the use of aids to cessation in English smokers. *Addiction*  
52 2009;**104**:1403–10. doi:10.1111/j.1360-0443.2009.02639.x
- 53 43 Cheeta S, Drummond C, Oyefeso A, *et al.* Low identification of alcohol use disorders in general practice in  
54  
55  
56  
57  
58  
59  
60



20

- 1  
2  
3 England. *Addiction* 2008;**103**:766–73. doi:10.1111/j.1360-0443.2008.02198.x
- 4 44 O'Donnell A, Kaner E. Are brief alcohol interventions adequately embedded in UK primary care? A  
5 qualitative study utilising normalisation process theory. *Int J Environ Res Public Health* 2017;**14**:350.  
6 doi:10.3390/ijerph14040350
- 7 45 O'Donnell A, Abidi L, Brown J, *et al.* Beliefs and attitudes about addressing alcohol consumption in health  
8 care: a population survey in England. *BMC Public Health* 2018;**18**:391. doi:10.1186/s12889-018-5275-2
- 9 46 Kaner E, Rapley T, May C. Seeing through the glass darkly? A qualitative exploration of GPs' drinking and  
10 their alcohol intervention practices. *Fam Pract* 2006;**23**:481–7. doi:10.1093/fampra/cml015
- 11 47 Sadler S, Angus C, Gavens L, *et al.* Understanding the alcohol harm paradox: an analysis of sex- and  
12 condition-specific hospital admissions by socio-economic group for alcohol-associated conditions in  
13 England. *Addiction* 2017;**112**. doi:10.1111/add.13726
- 14 48 McLean G, Sutton M, Guthrie B. Deprivation and quality of primary care services: evidence for persistence  
15 of the inverse care law from the UK Quality and Outcomes Framework. *J Epidemiol Community Health*  
16 2006;**60**:917–22. doi:10.1136/jech.2005.044628
- 17 49 Ellis DA, McQueenie R, McConnachie A, *et al.* Demographic and practice factors predicting repeated non-  
18 attendance in primary care: a national retrospective cohort analysis. *Lancet Public Heal* 2017;**2**:e551–9.  
19 doi:10.1016/S2468-2667(17)30217-7
- 20 50 Gulliford MC. Availability of primary care doctors and population health in England: is there an association?  
21 *J Public Health Med* 2002;**24**:252–4. doi:10.1093/PUBMED/24.4.252
- 22 51 Watt G. The inverse care law today. *Lancet* Published Online First:  
23 2002. <http://www.thelancet.com/pdfs/journals/lancet/PIIS0140673602094667.pdf> (accessed 22 Nov 2016).
- 24 52 Littlejohn C. Does socio-economic status influence the acceptability of, attendance for, and outcome of,  
25 screening and brief interventions for alcohol misuse: a review. *Alcohol Alcohol*. 2006;**41**:540–  
26 5. <http://ovidsp.ovid.com/ovidweb.cgi?T=JS&PAGE=reference&D=med4&NEWS=N&AN=16855002>
- 27 53 Edwards AGK, Rollnick S. Outcome studies of brief alcohol intervention in general practice: The problem of  
28 lost subjects. *Addiction* 1997;**92**:1699–704. doi:10.1111/j.1360-0443.1997.tb02890.x
- 29 54 Bauld L, Hiscock R, Dobbie F, *et al.* English Stop-Smoking Services: One-Year Outcomes. *Int J Environ Res*  
30 *Public Health* 2016;**13**:1175. doi:10.3390/ijerph13121175
- 31 55 Hiscock R, Bauld L, Amos A, *et al.* Socioeconomic status and smoking: a review. *Ann N Y Acad Sci*  
32 2012;**1248**:107–23. doi:10.1111/j.1749-6632.2011.06202.x
- 33 56 Sassi F, Belloni A, Mirelman AJ, *et al.* Equity impacts of price policies to promote healthy behaviours.  
34 *Lancet (London, England)* 2018;**391**:2059–70. doi:10.1016/S0140-6736(18)30531-2
- 35 57 Mackenbach JP, Stirbu I, Roskam A-JR, *et al.* Socioeconomic Inequalities in Health in 22 European Countries.  
36 *N Engl J Med* 2008;**358**:2468–81. doi:10.1056/NEJMsa0707519
- 37  
38  
39  
40

## 41 FIGURE LEGENDS

42  
43 **Figure 1 - Unadjusted socioeconomic gradients in prevalence, GP attendance and BI receipt for smokers and**  
44 **risky drinkers**

45  
46 **Figure 2 - Independent, fully-adjusted, association of socioeconomic position with Odds Ratio of receiving a**  
47 **Brief Intervention for smoking or risky drinking**

48  
49  
50  
51  
52  
53  
54  
55  
56  
57  
58  
59  
60

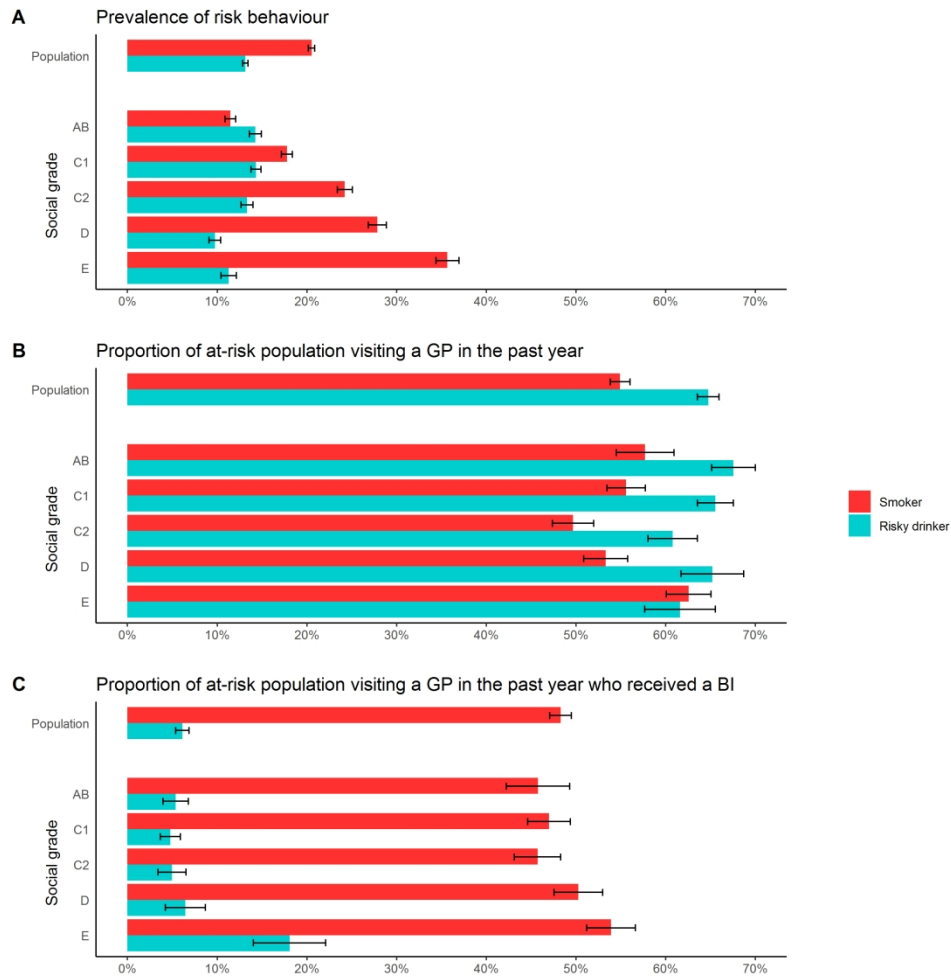

Unadjusted socioeconomic gradients in prevalence, GP attendance and BI receipt for smokers and risky drinkers

254x254mm (300 x 300 DPI)

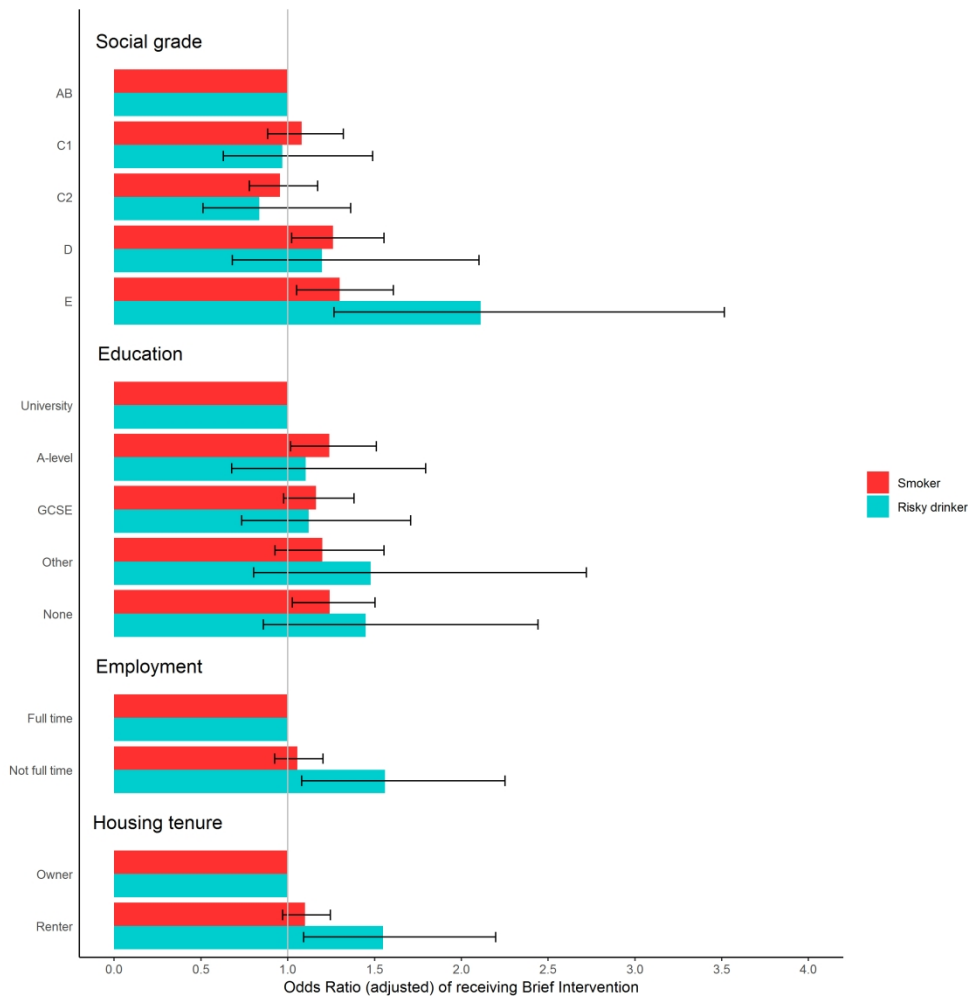

Independent, fully-adjusted, association of socioeconomic position with Odds Ratio of receiving a Brief Intervention for smoking or risky drinking

254x254mm (300 x 300 DPI)

# Reporting checklist for cross sectional study.

Based on the STROBE cross sectional guidelines.

## Instructions to authors

Complete this checklist by entering the page numbers from your manuscript where readers will find each of the items listed below.

Your article may not currently address all the items on the checklist. Please modify your text to include the missing information. If you are certain that an item does not apply, please write "n/a" and provide a short explanation.

Upload your completed checklist as an extra file when you submit to a journal.

In your methods section, say that you used the STROBE cross sectional reporting guidelines, and cite them as:

von Elm E, Altman DG, Egger M, Pocock SJ, Gotsche PC, Vandembroucke JP. The Strengthening the Reporting of Observational Studies in Epidemiology (STROBE) Statement: guidelines for reporting observational studies.

|                        |     | Reporting Item                                                                                                                  | Page Number |
|------------------------|-----|---------------------------------------------------------------------------------------------------------------------------------|-------------|
| Title                  | #1a | Indicate the study's design with a commonly used term in the title or the abstract                                              | 1           |
| Abstract               | #1b | Provide in the abstract an informative and balanced summary of what was done and what was found                                 | 2           |
| Background / rationale | #2  | Explain the scientific background and rationale for the investigation being reported                                            | 3           |
| Objectives             | #3  | State specific objectives, including any prespecified hypotheses                                                                | 3           |
| Study design           | #4  | Present key elements of study design early in the paper                                                                         | 3           |
| Setting                | #5  | Describe the setting, locations, and relevant dates, including periods of recruitment, exposure, follow-up, and data collection | 3           |

|    |                            |      |                                                                                                                                                                                                                                                                                |     |
|----|----------------------------|------|--------------------------------------------------------------------------------------------------------------------------------------------------------------------------------------------------------------------------------------------------------------------------------|-----|
| 1  | Eligibility criteria       | #6a  | Give the eligibility criteria, and the sources and methods of selection of participants.                                                                                                                                                                                       | 3   |
| 2  |                            |      |                                                                                                                                                                                                                                                                                |     |
| 3  |                            |      |                                                                                                                                                                                                                                                                                |     |
| 4  |                            |      |                                                                                                                                                                                                                                                                                |     |
| 5  |                            | #7   | Clearly define all outcomes, exposures, predictors, potential confounders, and effect modifiers. Give diagnostic criteria, if applicable                                                                                                                                       | 3-4 |
| 6  |                            |      |                                                                                                                                                                                                                                                                                |     |
| 7  |                            |      |                                                                                                                                                                                                                                                                                |     |
| 8  |                            |      |                                                                                                                                                                                                                                                                                |     |
| 9  |                            |      |                                                                                                                                                                                                                                                                                |     |
| 10 | Data sources / measurement | #8   | For each variable of interest give sources of data and details of methods of assessment (measurement). Describe comparability of assessment methods if there is more than one group. Give information separately for for exposed and unexposed groups if applicable.           | 4   |
| 11 |                            |      |                                                                                                                                                                                                                                                                                |     |
| 12 |                            |      |                                                                                                                                                                                                                                                                                |     |
| 13 |                            |      |                                                                                                                                                                                                                                                                                |     |
| 14 |                            |      |                                                                                                                                                                                                                                                                                |     |
| 15 |                            |      |                                                                                                                                                                                                                                                                                |     |
| 16 |                            |      |                                                                                                                                                                                                                                                                                |     |
| 17 |                            |      |                                                                                                                                                                                                                                                                                |     |
| 18 | Bias                       | #9   | Describe any efforts to address potential sources of bias                                                                                                                                                                                                                      | 4   |
| 19 |                            |      |                                                                                                                                                                                                                                                                                |     |
| 20 |                            |      |                                                                                                                                                                                                                                                                                |     |
| 21 | Study size                 | #10  | Explain how the study size was arrived at                                                                                                                                                                                                                                      | 6   |
| 22 |                            |      |                                                                                                                                                                                                                                                                                |     |
| 23 | Quantitative variables     | #11  | Explain how quantitative variables were handled in the analyses. If applicable, describe which groupings were chosen, and why                                                                                                                                                  | 3-4 |
| 24 |                            |      |                                                                                                                                                                                                                                                                                |     |
| 25 |                            |      |                                                                                                                                                                                                                                                                                |     |
| 26 |                            |      |                                                                                                                                                                                                                                                                                |     |
| 27 |                            |      |                                                                                                                                                                                                                                                                                |     |
| 28 | Statistical methods        | #12a | Describe all statistical methods, including those used to control for confounding                                                                                                                                                                                              | 4-5 |
| 29 |                            |      |                                                                                                                                                                                                                                                                                |     |
| 30 |                            |      |                                                                                                                                                                                                                                                                                |     |
| 31 |                            |      |                                                                                                                                                                                                                                                                                |     |
| 32 |                            |      |                                                                                                                                                                                                                                                                                |     |
| 33 |                            | #12b | Describe any methods used to examine subgroups and interactions                                                                                                                                                                                                                | n/a |
| 34 |                            |      |                                                                                                                                                                                                                                                                                |     |
| 35 |                            |      |                                                                                                                                                                                                                                                                                |     |
| 36 |                            | #12c | Explain how missing data were addressed                                                                                                                                                                                                                                        | 4   |
| 37 |                            |      |                                                                                                                                                                                                                                                                                |     |
| 38 |                            | #12d | If applicable, describe analytical methods taking account of sampling strategy                                                                                                                                                                                                 | 4   |
| 39 |                            |      |                                                                                                                                                                                                                                                                                |     |
| 40 |                            |      |                                                                                                                                                                                                                                                                                |     |
| 41 |                            |      |                                                                                                                                                                                                                                                                                |     |
| 42 |                            | #12e | Describe any sensitivity analyses                                                                                                                                                                                                                                              | 4   |
| 43 |                            |      |                                                                                                                                                                                                                                                                                |     |
| 44 | Participants               | #13a | Report numbers of individuals at each stage of study—eg numbers potentially eligible, examined for eligibility, confirmed eligible, included in the study, completing follow-up, and analysed. Give information separately for for exposed and unexposed groups if applicable. | 6   |
| 45 |                            |      |                                                                                                                                                                                                                                                                                |     |
| 46 |                            |      |                                                                                                                                                                                                                                                                                |     |
| 47 |                            | #13b | Give reasons for non-participation at each stage                                                                                                                                                                                                                               | n/a |
| 48 |                            |      |                                                                                                                                                                                                                                                                                |     |
| 49 |                            | #13c | Consider use of a flow diagram                                                                                                                                                                                                                                                 | n/a |
| 50 |                            |      |                                                                                                                                                                                                                                                                                |     |
| 51 |                            |      |                                                                                                                                                                                                                                                                                |     |
| 52 |                            |      |                                                                                                                                                                                                                                                                                |     |
| 53 |                            |      |                                                                                                                                                                                                                                                                                |     |
| 54 |                            |      |                                                                                                                                                                                                                                                                                |     |
| 55 |                            |      |                                                                                                                                                                                                                                                                                |     |
| 56 |                            |      |                                                                                                                                                                                                                                                                                |     |
| 57 |                            |      |                                                                                                                                                                                                                                                                                |     |
| 58 |                            |      |                                                                                                                                                                                                                                                                                |     |
| 59 |                            |      |                                                                                                                                                                                                                                                                                |     |
| 60 |                            |      |                                                                                                                                                                                                                                                                                |     |

|    |                  |      |                                                                                                                                                                                                                   |          |
|----|------------------|------|-------------------------------------------------------------------------------------------------------------------------------------------------------------------------------------------------------------------|----------|
| 1  | Descriptive data | #14a | Give characteristics of study participants (eg demographic, clinical, social) and information on exposures and potential confounders. Give information separately for exposed and unexposed groups if applicable. | 6        |
| 2  |                  |      |                                                                                                                                                                                                                   |          |
| 3  |                  |      |                                                                                                                                                                                                                   |          |
| 4  |                  |      |                                                                                                                                                                                                                   |          |
| 5  |                  |      |                                                                                                                                                                                                                   |          |
| 6  |                  |      |                                                                                                                                                                                                                   |          |
| 7  |                  |      |                                                                                                                                                                                                                   |          |
| 8  |                  | #14b | Indicate number of participants with missing data for each variable of interest                                                                                                                                   | 4        |
| 9  |                  |      |                                                                                                                                                                                                                   |          |
| 10 |                  |      |                                                                                                                                                                                                                   |          |
| 11 | Outcome data     | #15  | Report numbers of outcome events or summary measures. Give information separately for exposed and unexposed groups if applicable.                                                                                 | 6        |
| 12 |                  |      |                                                                                                                                                                                                                   |          |
| 13 |                  |      |                                                                                                                                                                                                                   |          |
| 14 |                  |      |                                                                                                                                                                                                                   |          |
| 15 |                  |      |                                                                                                                                                                                                                   |          |
| 16 |                  |      |                                                                                                                                                                                                                   |          |
| 17 | Main results     | #16a | Give unadjusted estimates and, if applicable, confounder-adjusted estimates and their precision (eg, 95% confidence interval). Make clear which confounders were adjusted for and why they were included          | 7, 9, 12 |
| 18 |                  |      |                                                                                                                                                                                                                   |          |
| 19 |                  |      |                                                                                                                                                                                                                   |          |
| 20 |                  |      |                                                                                                                                                                                                                   |          |
| 21 |                  |      |                                                                                                                                                                                                                   |          |
| 22 |                  |      |                                                                                                                                                                                                                   |          |
| 23 |                  |      |                                                                                                                                                                                                                   |          |
| 24 |                  | #16b | Report category boundaries when continuous variables were categorized                                                                                                                                             | 5        |
| 25 |                  |      |                                                                                                                                                                                                                   |          |
| 26 |                  |      |                                                                                                                                                                                                                   |          |
| 27 |                  |      |                                                                                                                                                                                                                   |          |
| 28 |                  | #16c | If relevant, consider translating estimates of relative risk into absolute risk for a meaningful time period                                                                                                      | n/a      |
| 29 |                  |      |                                                                                                                                                                                                                   |          |
| 30 |                  |      |                                                                                                                                                                                                                   |          |
| 31 | Other analyses   | #17  | Report other analyses done—e.g., analyses of subgroups and interactions, and sensitivity analyses                                                                                                                 | 14       |
| 32 |                  |      |                                                                                                                                                                                                                   |          |
| 33 |                  |      |                                                                                                                                                                                                                   |          |
| 34 |                  |      |                                                                                                                                                                                                                   |          |
| 35 | Key results      | #18  | Summarise key results with reference to study objectives                                                                                                                                                          | 14       |
| 36 |                  |      |                                                                                                                                                                                                                   |          |
| 37 | Limitations      | #19  | Discuss limitations of the study, taking into account sources of potential bias or imprecision. Discuss both direction and magnitude of any potential bias.                                                       | 14       |
| 38 |                  |      |                                                                                                                                                                                                                   |          |
| 39 |                  |      |                                                                                                                                                                                                                   |          |
| 40 |                  |      |                                                                                                                                                                                                                   |          |
| 41 |                  |      |                                                                                                                                                                                                                   |          |
| 42 |                  |      |                                                                                                                                                                                                                   |          |
| 43 | Interpretation   | #20  | Give a cautious overall interpretation considering objectives, limitations, multiplicity of analyses, results from similar studies, and other relevant evidence.                                                  | 14-15    |
| 44 |                  |      |                                                                                                                                                                                                                   |          |
| 45 |                  |      |                                                                                                                                                                                                                   |          |
| 46 |                  |      |                                                                                                                                                                                                                   |          |
| 47 |                  |      |                                                                                                                                                                                                                   |          |
| 48 | Generalisability | #21  | Discuss the generalisability (external validity) of the study results                                                                                                                                             | 14-15    |
| 49 |                  |      |                                                                                                                                                                                                                   |          |
| 50 |                  |      |                                                                                                                                                                                                                   |          |
| 51 |                  |      |                                                                                                                                                                                                                   |          |
| 52 | Funding          | #22  | Give the source of funding and the role of the funders for the present study and, if applicable, for the original study on which the present article is based                                                     | 15       |
| 53 |                  |      |                                                                                                                                                                                                                   |          |
| 54 |                  |      |                                                                                                                                                                                                                   |          |
| 55 |                  |      |                                                                                                                                                                                                                   |          |
| 56 |                  |      |                                                                                                                                                                                                                   |          |
| 57 |                  |      |                                                                                                                                                                                                                   |          |
| 58 |                  |      |                                                                                                                                                                                                                   |          |
| 59 |                  |      |                                                                                                                                                                                                                   |          |
| 60 |                  |      |                                                                                                                                                                                                                   |          |

1 The STROBE checklist is distributed under the terms of the Creative Commons Attribution License  
2 CC-BY. This checklist was completed on 06. April 2018 using <http://www.goodreports.org/>, a tool  
3 made by the [EQUATOR Network](#) in collaboration with [Penelope.ai](#)  
4  
5  
6  
7  
8  
9  
10  
11  
12  
13  
14  
15  
16  
17  
18  
19  
20  
21  
22  
23  
24  
25  
26  
27  
28  
29  
30  
31  
32  
33  
34  
35  
36  
37  
38  
39  
40  
41  
42  
43  
44  
45  
46  
47  
48  
49  
50  
51  
52  
53  
54  
55  
56  
57  
58  
59  
60

# BMJ Open

## Socioeconomic inequalities in the delivery of Brief Interventions for smoking and excessive drinking: Findings from a cross-sectional household survey in England

|                                 |                                                                                                                                                                                                                                                                                                                                                                                                                                                                                                                                                                                        |
|---------------------------------|----------------------------------------------------------------------------------------------------------------------------------------------------------------------------------------------------------------------------------------------------------------------------------------------------------------------------------------------------------------------------------------------------------------------------------------------------------------------------------------------------------------------------------------------------------------------------------------|
| Journal:                        | <i>BMJ Open</i>                                                                                                                                                                                                                                                                                                                                                                                                                                                                                                                                                                        |
| Manuscript ID                   | bmjopen-2018-023448.R2                                                                                                                                                                                                                                                                                                                                                                                                                                                                                                                                                                 |
| Article Type:                   | Research                                                                                                                                                                                                                                                                                                                                                                                                                                                                                                                                                                               |
| Date Submitted by the Author:   | 24-Jan-2019                                                                                                                                                                                                                                                                                                                                                                                                                                                                                                                                                                            |
| Complete List of Authors:       | Angus, Colin; University of Sheffield, School of Health and Related Research<br>Brown, Jamie; University College London, Psychology & Language Sciences<br>Beard, Emma; UCL,<br>Gillespie, Duncan; The University of Sheffield, School of Health and Related Research<br>Buykx, Penelope; University of Sheffield, School of Health and Related Research<br>Kaner, Eileen; Newcastle University, Institute<br>Michie, Susan; University College London, Centre for Outcomes Research and Effectiveness<br>Meier, Petra; University of Sheffield, School of Health and Related Research |
| <b>Primary Subject Heading</b>: | Public health                                                                                                                                                                                                                                                                                                                                                                                                                                                                                                                                                                          |
| Secondary Subject Heading:      | General practice / Family practice, Health policy, Smoking and tobacco                                                                                                                                                                                                                                                                                                                                                                                                                                                                                                                 |
| Keywords:                       | Alcohol, Smoking, Brief Interventions, Health Inequalities, PRIMARY CARE, PUBLIC HEALTH                                                                                                                                                                                                                                                                                                                                                                                                                                                                                                |
|                                 |                                                                                                                                                                                                                                                                                                                                                                                                                                                                                                                                                                                        |

SCHOLARONE™  
Manuscripts



1

# Socioeconomic inequalities in the delivery of Brief Interventions for smoking and excessive drinking: Findings from a cross-sectional household survey in England

Colin Angus\*, MSc, Sheffield Alcohol Research Group, School of Health and Related Research, University of Sheffield, UK

Jamie Brown, PhD, Health Behaviour Research Centre, Department of Epidemiology and Community health, University College London, UK

Emma Beard, PhD, Department of Clinical, Educational and Health Psychology, University College London, UK

Duncan Gillespie, PhD, Sheffield Alcohol Research Group, School of Health and Related Research, University of Sheffield, UK

Penny Buykx, PhD, Sheffield Alcohol Research Group, School of Health and Related Research, University of Sheffield, UK

Eileen Kaner, PhD, Institute of Health and Society, University of Newcastle upon Tyne, UK

Susan Michie, PhD, Department of Clinical, Educational and Health Psychology, University College London, UK

Petra S Meier, PhD, Sheffield Alcohol Research Group, School of Health and Related Research, University of Sheffield, UK

\* Corresponding author

Address: Regent Court, Regent Street, Sheffield, S1 4DA, UK

Tel 0114 2220686.

Email [c.r.angus@sheffield.ac.uk](mailto:c.r.angus@sheffield.ac.uk)

Word count: 3519

Keywords: Alcohol, Smoking, Brief Interventions, Health Inequalities, Primary Care, Public Health

2

**ABSTRACT****Objectives**

Brief Interventions [BI] for smoking and risky drinking are effective and cost-effective policy approaches to reducing alcohol harm currently used in primary care in England, however little is known about their contribution to health inequalities. This paper aims to investigate whether self-reported receipt of BI is associated with socioeconomic position and whether this differs for smoking or alcohol.

**Design**

Population survey of 8,978 smokers or risky drinkers in England aged 16+ taking part in the Alcohol and Smoking Toolkit Studies

**Measures**

Survey participants answered questions regarding whether they had received advice and support to cut down their drinking or smoking from a primary healthcare professional in the past 12 months as well as their socioeconomic position, demographic details, whether they smoke and their motivation to cut down their smoking and/or drinking. Respondents also completed the Alcohol Use Disorders Identification Test (AUDIT). Smokers were defined as those reporting any smoking in the past year. Risky drinkers were defined as those scoring 8 or more on the AUDIT.

**Results**

After adjusting for demographic factors and patterns in smoking and drinking, BI delivery was highest in lower socioeconomic groups. Smokers in the lowest social grade had 30% (95% CI 5% to 61%) greater odds of reporting receipt of a BI than those in the highest grade. The relationship for risky drinking appeared stronger, with those in the lowest social grade having 111% (95% CI 27% to 252%) greater odds of reporting BI receipt than the highest grade. Rates of BI delivery were 8 times greater among smokers than risky drinkers (48.3% vs 6.1%).

**Conclusions**

Current delivery of Brief Interventions for smoking and drinking in primary care in England may be contributing to a reduction in socioeconomic inequalities in health. This effect could be increased if intervention rates, particularly for drinking, were raised.

**ARTICLE SUMMARY****Strengths and limitations of this study**

- Used data from a large representative sample of adult smokers and drinkers in England
- Based on data on intervention receipt reported by patients, rather than practitioners
- Analysis controls for a broad range of potential confounding demographic factors
- Respondents may have underestimated or misreported their drinking or smoking
- There may be additional socioeconomic gradients in intervention effectiveness which could moderate the overall impact of Brief Interventions on health inequalities

## INTRODUCTION

Tobacco smoking and the excessive consumption of alcohol are leading causes of preventable disease both in the UK and worldwide[1] and inequalities in both alcohol and tobacco-related health harms are a significant contributor to wider inequalities in health [2,3]. Underlying these inequalities are conflicting socioeconomic patterns in the behaviours themselves. Smoking prevalence and related harm both increase with deprivation [4], while for alcohol consumption the picture is more complex. Those in more deprived groups are more likely to abstain from drinking, and those who drink are more likely to drink within UK drinking guidelines compared to less deprived groups [5], while those in more deprived groups who drink heavily drink more on average than heavy drinkers in less deprived groups [6]. This, in part, has meant that numerous studies have found alcohol consumption to be lower in more deprived groups even though they suffer greater levels of alcohol-related harm [2,7,8], a phenomenon referred to as the 'Alcohol Harm Paradox'[7,9].

Screening and Brief Interventions, consisting of an initial case finding or screening step followed by delivery of feedback and structured advice or behaviour change counselling, delivered in primary care, is an effective and cost-effective measure to increase smoking cessation rates[10,11] and reduce harmful drinking [12,13]. Current UK clinical guidelines recommend that all patients are assessed for smoking annually, with a Brief Intervention (BI) delivered to all smokers [14]. Guidance for alcohol encourages the use of opportunistic screening and BI alongside requirements to screen all patients registering with a new primary care provider or attending a Health Check [15,16]. In spite of this guidance, BI delivery levels remain low in England [17], particularly for alcohol [18], a finding that has been replicated in many other countries [19–21].

Research across a broad range of interventions and settings has found that public health policies, including screening programmes in primary care, may exacerbate inequalities in health even while improving population health overall [22,23]. In this context it is striking that very little research to date has considered the potential for BI programmes for tobacco or alcohol to affect inequalities, particularly given the high socioeconomic variation in poor health due to both behaviours. We aimed to address this gap by examining whether there are sociodemographic gradients in BI delivery for smoking and drinking and whether these can be explained by sociodemographic or behavioural characteristics of patients attending primary care in England.

## METHODS

### Data Sources

The Alcohol and Smoking Toolkit Studies are large, nationally representative, monthly surveys of adults aged 16+ in England [24,25]. A sample of approximately 1,700 respondents each month participate in household computer-assisted interviews. The survey uses a form of random location sampling, representing a hybrid between random probability and simple quota sampling (see published protocols for further details [24,25]). We used data collected between March 2014 and July 2016 (N=48,808) with analysis restricted to respondents who reported visiting the General Practitioner (GP) in the past 12 months and were either smokers (those reporting that they had smoked cigarettes or other tobacco products at least occasionally in the past year – see supplementary file for full details) or risky drinkers (those scoring at least eight on the Alcohol Use Disorders Identification Test (AUDIT) [26]). This gave a total sample of 9,042 adults of whom 5,004 were smokers only, 2,528 were risky drinkers only, and 1,446 were both (data on the smoking status of one risky drinker and the drinking status of 63 smokers were missing).

4

## Measures

Our primary outcome measure was self-reported receipt of a BI (or more intensive intervention) from a GP or other primary care-based health worker in the past year. Respondents who smoked were asked 'Has your GP spoken to you about smoking in the past year?' and BI receipt was categorised as a response of at least 'Yes, he/she advised me to stop but did not offer anything'. Risky drinkers were asked 'In the last 12 months has a doctor or other health worker within your GP surgery discussed your drinking?', with BI receipt categorised as a response of at least 'Yes, a doctor or other health worker within my GP surgery offered advice about cutting down my drinking'. Note that this definition includes referral to specialist treatment as recommended for those with potential alcohol dependence. See supplementary file for a full list of response options.

Data was also collected on respondents' age, gender, region of England (categorised as North, Midlands or South), the number of children in the household (categorised as 0 or 1+), self-reported disability status (disability/no disability) and ethnicity (white, mixed/multiple ethnic group, Asian or British Asian, black, other). Self-reported motivation to reduce smoking and drinking was recorded and grouped into those responding 'I don't want to stop smoking/cut down on drinking', those reporting some degree of motivation to quit/cut down, and those who were highly motivated and willing to specify a time frame for cutting down – 'I really want to stop smoking and intend to in the next month/3 months').

As previous studies have identified that different measures of socioeconomic position (SEP) demonstrate different relationships with alcohol consumption [6,9], we examined four alternative measures SEP:

- 1) Social grade, classified Using the British National Readership Survey Social-Grade Classification Tool [27]: A: higher managerial, administrative or professional; B: intermediate managerial, administrative or professional; C1: supervisory or clerical and junior managerial administrative or professional; C2: skilled manual workers; D: Semi and unskilled manual workers; E: Casual or lowest grade workers, pensioners and others who depend on the welfare state for their income.
- 2) Educational level, grouped as: University education, A-level and equivalent, GCSE/vocational, other/still studying, none
- 3) Working status, categorised as being in full-time employment or otherwise
- 4) Housing tenure, categorised as owner occupied (owned outright or being brought with a mortgage) or otherwise

Finally, in order to test whether higher levels of alcohol consumption increase the likelihood of receiving a BI, the risky drinker group were further subdivided according to their AUDIT score in line with World Health Organization guidelines [26]:

- 8-15 - Risky drinker
- 16-19 – High risk drinkers
- 20+ - Possible alcohol dependence

## Analysis

Data were weighted using an iterative 'rim weighting' technique as used in previous analyses of Smoking and Alcohol Toolkit data (e.g. [18]). Parallel analysis using unweighted data is reported in the supplementary file (Tables S1-S7 & Figure S1). Missing data were imputed using Multiple Imputation with 20 datasets [28] and analytical results combined using Rubin's Rules [29]. Complete case only analyses are reported in the supplementary material (Tables S8-S13 & Figure S2). All

5

1  
2  
3 imputation and analyses were undertaken using Stata 12 [30] following a plan pre-registered with  
4 the Open Science Framework prior to any data analysis (<https://osf.io/5eq4h/>). As the only  
5 continuous variable in the analysis, age was standardised and tested for non-linearity using the Box-  
6 Tidwell approach [31]. This suggested significant non-linearity and age was therefore categorised  
7 into six groups (18-24, 25-34, 35-44, 45-54, 55-64 and 65+).  
8  
9

10 The analysis consisted of four steps:

11 1) we produced descriptive tables the full dataset showing rates of smoking and risky drinking (all  
12 respondents scoring AUDIT 8+) in the population and rates of GP attendance and BI receipt for those  
13 who visited their GP for both smokers and risky drinkers, stratified by the 4 socioeconomic measures  
14 to show the extent to which socioeconomic inequalities exist before adjusting for demographic and  
15 other factors.  
16

17 2) to examine the extent to which variation in BI delivery among those at risk and attending primary  
18 care in the past year can be explained by demographic characteristics alone, we fitted two  
19 multivariable logistic regression models in which receipt of a smoking or alcohol intervention was  
20 regressed on age, gender, region, number of children in the household, disability status and  
21 ethnicity. These models also include a linear (monthly) temporal trend to assess whether BI rates  
22 have increased or decreased over the data collection period.  
23

24 3) to examine the extent to which drinking and smoking behaviour, and motivations to cut down can  
25 explain additional variation in BI delivery, we fitted two further multivariable models which  
26 additionally adjust for drinking status (risky versus non-risky) and motivation to stop smoking (in the  
27 smoking model) or smoking status (smoker versus non-smoker), AUDIT group and motivation to cut  
28 down drinking (in the drinking model).  
29

30 4) to examine whether socioeconomic position can explain any remaining variation in BI delivery, we  
31 fitted fully-adjusted models in which each of the 4 measures of socioeconomic position was added  
32 separately.  
33  
34  
35

### 36 Patient and Public Involvement

37  
38 Neither patients nor the public were involved in the design of this study. STROBE (Strengthening the  
39 Reporting of Observational Studies in Epidemiology) guidelines were followed throughout [32].  
40

## 41 RESULTS

### 42 Descriptive statistics

43  
44 Demographic characteristics for the 9,042 smokers and risky drinkers included in the analytic sample  
45 are presented in Table 1. This shows a relatively even spread of both smokers and risky drinkers  
46 across the life course, except for the youngest age group (18-24 year olds) which has a greater  
47 concentration of risky drinkers. Smokers are more likely to be female and more likely to live with  
48 children or have a disability than risky drinkers. The other key distinction comes in terms of  
49 motivation to cut down or quit, with 67.4% of smokers reporting some motivation to reduce their  
50 smoking compared to only 39.4% of risky drinkers.  
51  
52  
53  
54  
55  
56  
57  
58  
59  
60

6

**Table 1 - Characteristics of survey respondents included in statistical models (unweighted)**

|                                               |            | <b>Past year smokers<br/>(n=6513)</b> | <b>Risky drinkers<br/>(n=3975)</b> |
|-----------------------------------------------|------------|---------------------------------------|------------------------------------|
| <b>Age, n (%)</b>                             | 18-24      | 1051 (16.1%)                          | 877 (22.1%)                        |
|                                               | 25-34      | 1222 (18.8%)                          | 539 (13.6%)                        |
|                                               | 35-44      | 1052 (16.2%)                          | 572 (14.4%)                        |
|                                               | 45-54      | 1126 (17.3%)                          | 741 (18.6%)                        |
|                                               | 55-64      | 1046 (16.1%)                          | 643 (16.2%)                        |
|                                               | 65+        | 991 (15.2%)                           | 595 (15%)                          |
|                                               | Missing    | 25 (0.4%)                             | 8 (0.2%)                           |
| <b>Sex, n (%)</b>                             | Male       | 3253 (49.9%)                          | 2600 (65.4%)                       |
|                                               | Female     | 3260 (50.1%)                          | 1375 (34.6%)                       |
|                                               | Missing    | 0 (0%)                                | 0 (0%)                             |
| <b>Region, n (%)</b>                          | North      | 2540 (39%)                            | 1974 (49.7%)                       |
|                                               | Midlands   | 1730 (26.6%)                          | 716 (18%)                          |
|                                               | South      | 2234 (34.3%)                          | 1282 (32.3%)                       |
|                                               | Missing    | 9 (0.1%)                              | 3 (0.1%)                           |
| <b>Children in the household, n (%)</b>       | Yes        | 4308 (66.1%)                          | 3030 (76.2%)                       |
|                                               | No         | 2205 (33.9%)                          | 945 (23.8%)                        |
|                                               | Missing    | 0 (0%)                                | 0 (0%)                             |
| <b>Disability, n (%)</b>                      | Yes        | 5121 (78.6%)                          | 3420 (86%)                         |
|                                               | No         | 1275 (19.6%)                          | 494 (12.4%)                        |
|                                               | Missing    | 117 (1.8%)                            | 61 (1.5%)                          |
| <b>Ethnicity, n (%)</b>                       | White      | 5812 (89.2%)                          | 3813 (95.9%)                       |
|                                               | Mixed race | 111 (1.7%)                            | 59 (1.5%)                          |
|                                               | Asian      | 353 (5.4%)                            | 39 (1%)                            |
|                                               | Black      | 147 (2.3%)                            | 39 (1%)                            |
|                                               | Arab/other | 61 (0.9%)                             | 10 (0.3%)                          |
|                                               | Missing    | 29 (0.4%)                             | 15 (0.4%)                          |
| <b>Motivation to cut down smoking, n (%)</b>  | None       | 1649 (25.3%)                          |                                    |
|                                               | Moderate   | 3415 (52.4%)                          |                                    |
|                                               | High       | 978 (15%)                             |                                    |
|                                               | Missing    | 471 (7.2%)                            |                                    |
| <b>Risky drinker, n (%)</b>                   | Yes        | 5004 (76.8%)                          |                                    |
|                                               | No         | 1446 (22.2%)                          |                                    |
|                                               | Missing    | 63 (1%)                               |                                    |
| <b>AUDIT score, n (%)</b>                     | 8-15       |                                       | 3504 (88.2%)                       |
|                                               | 16-19      |                                       | 251 (6.3%)                         |
|                                               | 20+        |                                       | 220 (5.5%)                         |
|                                               | Missing    |                                       | 0 (0%)                             |
| <b>Motivation to cut down drinking, n (%)</b> | None       |                                       | 2372 (59.7%)                       |
|                                               | Moderate   |                                       | 1273 (32%)                         |
|                                               | High       |                                       | 296 (7.4%)                         |
|                                               | Missing    |                                       | 34 (0.9%)                          |
| <b>Past year smoker, n (%)</b>                | Yes        |                                       | 2528 (63.6%)                       |
|                                               | No         |                                       | 1446 (36.4%)                       |
|                                               | Missing    |                                       | 1 (0%)                             |

1  
2  
3 Descriptive analyses (Table 2) show that overall, smoking was more prevalent than risky drinking  
4 (20.5% vs. 13.1% of the adult population). There were also marked socioeconomic gradients in  
5 prevalence, with smoking increasingly common in lower socioeconomic groups (e.g. 35.7% of social  
6 grade E respondents compared to 11.5% in grade AB), while the gradient in risky drinking was less  
7 stark and in the opposite direction (11.3% in grade E compared to 14.3% in grade AB). These  
8 gradients were seen most clearly for social grade, although similar patterns existed for education,  
9 but were not evident when using employment for smokers and housing tenure for drinkers. There  
10 were no clear gradients for GP attendance, although risky drinkers were more likely than smokers to  
11 have visited their GP in the past year (64.8% vs. 54.9%). Observed rates of BI receipt for those who  
12 had visited their GP (the sample used in the statistical analysis) suggest a socioeconomic gradient in  
13 BI delivery, with a greater proportion of respondents in lower SEP groups reporting that they had  
14 received a BI for both smoking and drinking. There appears, however, to be a divergence in the  
15 shape of this gradient, with BI receipt for smokers increasing linearly as SEP decreases, while the  
16 higher rates of BI receipt in risky drinkers are concentrated in the most deprived group. These  
17 patterns, for social grade, are illustrated in Figure 1.  
18  
19  
20  
21  
22  
23  
24  
25  
26  
27  
28  
29  
30  
31  
32  
33  
34  
35  
36  
37  
38  
39  
40  
41  
42  
43  
44  
45  
46  
47  
48  
49  
50  
51  
52  
53  
54  
55  
56  
57  
58  
59  
60

8

**Table 2 - Descriptive analysis of prevalence, GP attendance and BI delivery rates for smokers and risky drinkers by socioeconomic position (weighted, 95% Confidence Intervals in brackets)**

|                |            | Past year smokers        |                             |                              | Risky drinkers           |                             |                              |
|----------------|------------|--------------------------|-----------------------------|------------------------------|--------------------------|-----------------------------|------------------------------|
|                |            | Prevalence in population | Who visited GP in past year | Who received BI   visited GP | Prevalence in population | Who visited GP in past year | Who received BI   visited GP |
| Population     |            | 20.5% (20.2 to 20.9)     | 54.9% (53.8 to 56)          | 48.3% (47.1 to 49.5)         | 13.1% (12.8 to 13.3)     | 64.8% (63.6 to 65.4)        | 6.1% (5.4 to 6.5)            |
| Social grade   |            |                          |                             |                              |                          |                             |                              |
|                | AB         | 11.5% (10.9 to 12.1)     | 57.7% (54.5 to 60.9)        | 45.8% (42.3 to 49.3)         | 14.3% (13.6 to 14.6)     | 67.6% (65.1 to 68.8)        | 5.4% (4 to 6.1)              |
|                | C1         | 17.8% (17.2 to 18.4)     | 55.6% (53.4 to 57.7)        | 47% (44.6 to 49.4)           | 14.3% (13.8 to 14.6)     | 65.5% (63.5 to 66.6)        | 4.8% (3.7 to 5.3)            |
|                | C2         | 24.2% (23.4 to 25.1)     | 49.7% (47.4 to 52)          | 45.7% (43.1 to 48.3)         | 13.3% (12.7 to 13.7)     | 60.8% (58 to 62.2)          | 5% (3.4 to 5.8)              |
|                | D          | 27.8% (26.8 to 28.8)     | 53.3% (50.9 to 55.8)        | 50.3% (47.6 to 53)           | 9.7% (9.1 to 10.1)       | 65.2% (61.7 to 67)          | 6.5% (4.2 to 7.6)            |
|                | E          | 35.7% (34.4 to 37)       | 62.6% (60.1 to 65.1)        | 53.9% (51.2 to 56.6)         | 11.3% (10.4 to 11.7)     | 61.6% (57.7 to 63.6)        | 18.1% (14 to 20.1)           |
| Education      |            |                          |                             |                              |                          |                             |                              |
|                | University | 12.6% (12 to 13.1)       | 53.7% (51 to 56.3)          | 44.3% (41.3 to 47.3)         | 13.6% (13 to 13.9)       | 66.4% (64.2 to 67.6)        | 4.9% (3.7 to 5.6)            |
|                | A-level    | 21% (20.1 to 21.8)       | 53.5% (50.9 to 56)          | 48% (45.2 to 50.9)           | 18.6% (17.8 to 19)       | 59.7% (57.3 to 60.9)        | 4.7% (3.4 to 5.4)            |
|                | GCSE       | 26.1% (25.4 to 26.9)     | 54.8% (53 to 56.7)          | 47.5% (45.5 to 49.6)         | 13.1% (12.5 to 13.4)     | 65.1% (62.8 to 66.2)        | 6.6% (5.1 to 7.3)            |
|                | Other      | 18.3% (17.1 to 19.5)     | 56.8% (52.7 to 60.9)        | 49.3% (44.8 to 53.8)         | 11.4% (10.4 to 11.9)     | 70.3% (65.9 to 72.5)        | 7.9% (4.8 to 9.4)            |
|                | None       | 26.6% (25.6 to 27.5)     | 57.1% (54.7 to 59.5)        | 52.6% (50.1 to 55.2)         | 6.6% (6.1 to 6.9)        | 68.8% (64.9 to 70.8)        | 11.4% (8.2 to 13)            |
| Employment     |            |                          |                             |                              |                          |                             |                              |
|                | Full time  | 21.8% (21.2 to 22.5)     | 47.4% (45.6 to 49.3)        | 46.1% (43.9 to 48.3)         | 16.7% (16.1 to 17)       | 60.2% (58.4 to 61.2)        | 4.2% (3.2 to 4.7)            |
|                | Other      | 19.7% (19.3 to 20.1)     | 60.3% (59 to 61.7)          | 49.5% (48.1 to 51)           | 10.9% (10.6 to 11.1)     | 69% (67.5 to 69.8)          | 7.6% (6.5 to 8.1)            |
| Housing tenure |            |                          |                             |                              |                          |                             |                              |
|                | Owner      | 13.6% (13.2 to 14)       | 56.3% (54.5 to 58)          | 48% (46.1 to 49.9)           | 12.3% (11.9 to 12.5)     | 67.5% (65.9 to 68.3)        | 5.2% (4.3 to 5.7)            |
|                | Renter     | 33.7% (33 to 34.4)       | 54.3% (52.8 to 55.7)        | 48.7% (47.1 to 50.2)         | 14.9% (14.4 to 15.2)     | 60.8% (58.9 to 61.7)        | 7.7% (6.4 to 8.4)            |

*Unweighted sample sizes can be found in online supplementary Table S14*

**INSERT FIGURE 1 ABOUT HERE**



### Adjusted models for smoking

Results for the demographic-adjusted models for receipt of smoking BI (Table 3) show that older smokers had significantly greater odds of having received a BI than 18-24 year olds (e.g. OR 2.06 95% CI 1.68 to 2.51 for 65+ year olds). Significant effects were also seen for region, with smokers in the South having lower odds of receiving an intervention than those in the North (OR 0.81 95% CI 0.71 to 0.92) and for those with a self-reported disability having greater odds of receiving one than those without (OR 1.37 95% CI 1.19 to 1.57). There was no significant temporal trend in BI delivery.

The addition of behavioural factors to the model (see supplementary material Table S15 for full results) did not change the magnitude or significance of the demographic coefficients, but demonstrated that smokers who were also risky drinkers had lower odds of receiving a smoking BI (OR 0.84 95% CI 0.73 to 0.97) and that there was a strong association with both moderate (OR 1.42 95% CI 1.25 to 1.63) and high levels of motivation to cut down or quit smoking (OR 2.14 95% CI 1.79 to 2.57) and BI receipt. Finally, the addition of socioeconomic measures to the models showed significantly increased levels of BI receipt in social grades D and E compared to grade AB (OR 1.26 95% CI 1.02 to 1.55 and OR 1.30 95% CI 1.05 to 1.61 respectively). Significant increases in BI receipt were also observed in those with A-levels and no formal qualifications compared to university-level qualifications (OR 1.24 95% CI 1.02 to 1.51 and OR 1.24 95% CI 1.03 to 1.50 respectively), but no significant association employment status or housing tenure was identified.

10

**Table 3 - Logistic regression results for factors associated with likelihood of receiving Brief Intervention for smoking**

|                                |            | Demographic-adjusted model |                  | Behavioural and Socioeconomic-adjusted models |                  |           |                  |           |                  |      |                  |           |                  |
|--------------------------------|------------|----------------------------|------------------|-----------------------------------------------|------------------|-----------|------------------|-----------|------------------|------|------------------|-----------|------------------|
|                                |            | OR                         | 95% CI           | OR                                            | 95% CI           | OR        | 95% CI           | OR        | 95% CI           | OR   | 95% CI           | OR        | 95% CI           |
| Age                            | 18-24      | Reference                  |                  |                                               |                  |           |                  |           |                  |      |                  |           |                  |
|                                | 25-34      | 1.39                       | *** 1.16 to 1.67 | 1.38                                          | ** 1.14 to 1.68  | 1.38      | ** 1.14 to 1.68  | 1.37      | ** 1.13 to 1.66  | 1.36 | ** 1.12 to 1.65  | 1.36      | ** 1.12 to 1.65  |
|                                | 35-44      | 1.57                       | *** 1.30 to 1.90 | 1.60                                          | *** 1.31 to 1.96 | 1.60      | *** 1.31 to 1.97 | 1.57      | *** 1.28 to 1.93 | 1.59 | *** 1.30 to 1.94 | 1.59      | *** 1.30 to 1.94 |
|                                | 45-54      | 2.00                       | *** 1.66 to 2.41 | 2.03                                          | *** 1.67 to 2.47 | 2.03      | *** 1.66 to 2.48 | 2.00      | *** 1.64 to 2.44 | 2.03 | *** 1.67 to 2.48 | 2.03      | *** 1.67 to 2.48 |
|                                | 55-64      | 2.19                       | *** 1.80 to 2.66 | 2.30                                          | *** 1.86 to 2.83 | 2.26      | *** 1.82 to 2.79 | 2.23      | *** 1.81 to 2.75 | 2.31 | *** 1.86 to 2.86 | 2.31      | *** 1.86 to 2.86 |
|                                | 65+        | 2.06                       | *** 1.68 to 2.51 | 2.22                                          | *** 1.79 to 2.75 | 2.14      | *** 1.71 to 2.67 | 2.11      | *** 1.70 to 2.62 | 2.23 | *** 1.79 to 2.78 | 2.23      | *** 1.79 to 2.78 |
| Gender                         | Male       | Reference                  |                  |                                               |                  |           |                  |           |                  |      |                  |           |                  |
|                                | Female     | 1.01                       | 0.91 to 1.13     | 0.95                                          | 0.84 to 1.07     | 0.97      | 0.86 to 1.09     | 0.96      | 0.85 to 1.08     | 0.96 | 0.86 to 1.08     | 0.96      | 0.86 to 1.08     |
| Region                         | North      | Reference                  |                  |                                               |                  |           |                  |           |                  |      |                  |           |                  |
|                                | Midlands   | 0.94                       | 0.82 to 1.08     | 0.93                                          | 0.81 to 1.08     | 0.93      | 0.80 to 1.07     | 0.93      | 0.81 to 1.07     | 0.93 | 0.81 to 1.07     | 0.93      | 0.81 to 1.07     |
|                                | South      | 0.81                       | ** 0.71 to 0.92  | 0.79                                          | ** 0.69 to 0.91  | 0.79      | *** 0.69 to 0.90 | 0.78      | *** 0.68 to 0.89 | 0.77 | *** 0.68 to 0.88 | 0.77      | *** 0.68 to 0.88 |
| Children in the household      | None       | Reference                  |                  |                                               |                  |           |                  |           |                  |      |                  |           |                  |
|                                | ≥1         | 1.14                       | 0.99 to 1.30     | 1.07                                          | 0.93 to 1.23     | 1.08      | 0.93 to 1.24     | 1.08      | 0.94 to 1.24     | 1.08 | 0.94 to 1.24     | 1.08      | 0.94 to 1.24     |
| Self-reported disability       | No         | Reference                  |                  |                                               |                  |           |                  |           |                  |      |                  |           |                  |
|                                | Yes        | 1.37                       | *** 1.19 to 1.57 | 1.33                                          | *** 1.14 to 1.55 | 1.38      | *** 1.19 to 1.59 | 1.38      | *** 1.19 to 1.60 | 1.37 | *** 1.18 to 1.59 | 1.37      | *** 1.18 to 1.59 |
| Ethnicity                      | White      | Reference                  |                  |                                               |                  |           |                  |           |                  |      |                  |           |                  |
|                                | Mixed race | 0.92                       | 0.60 to 1.39     | 0.85                                          | 0.54 to 1.34     | 0.87      | 0.56 to 1.36     | 0.87      | 0.56 to 1.35     | 0.86 | 0.55 to 1.34     | 0.86      | 0.55 to 1.34     |
|                                | Asian      | 0.92                       | 0.72 to 1.18     | 0.84                                          | 0.65 to 1.09     | 0.87      | 0.67 to 1.12     | 0.86      | 0.67 to 1.11     | 0.87 | 0.68 to 1.13     | 0.87      | 0.68 to 1.13     |
|                                | Black      | 1.20                       | 0.83 to 1.72     | 0.98                                          | 0.67 to 1.46     | 1.01      | 0.68 to 1.49     | 1.01      | 0.68 to 1.49     | 1.00 | 0.67 to 1.48     | 1.00      | 0.67 to 1.48     |
|                                | Arab/other | 0.95                       | 0.55 to 1.63     | 0.94                                          | 0.52 to 1.69     | 0.93      | 0.52 to 1.68     | 0.93      | 0.52 to 1.66     | 0.91 | 0.50 to 1.63     | 0.91      | 0.50 to 1.63     |
| Time trend (monthly)           |            | 1.00                       | 0.99 to 1.01     | 1.00                                          | 0.99 to 1.01     | 1.00      | 1.00 to 1.01     | 1.00      | 1.00 to 1.01     | 1.00 | 1.00 to 1.01     | 1.00      | 0.99 to 1.01     |
| Risky drinker (AUDIT 8+)       | No         |                            |                  |                                               |                  |           |                  |           |                  |      |                  |           |                  |
|                                | Yes        |                            |                  | 0.86                                          | * 0.75 to 0.99   | 0.85      | * 0.74 to 0.98   | 0.85      | * 0.73 to 0.97   | 0.85 | * 0.74 to 0.98   | 0.85      | * 0.74 to 0.98   |
| Motivation to cut down smoking | None       |                            |                  |                                               |                  |           |                  |           |                  |      |                  |           |                  |
|                                | Moderate   |                            |                  | 1.44                                          | *** 1.26 to 1.64 | 1.44      | *** 1.26 to 1.64 | 1.43      | *** 1.25 to 1.63 | 1.43 | *** 1.25 to 1.63 | 1.43      | *** 1.25 to 1.63 |
|                                | High       |                            |                  | 2.19                                          | *** 1.83 to 2.63 | 2.16      | *** 1.80 to 2.59 | 2.15      | *** 1.79 to 2.58 | 2.15 | *** 1.80 to 2.58 | 2.15      | *** 1.80 to 2.58 |
| Social grade                   | AB         |                            |                  | Reference                                     |                  |           |                  |           |                  |      |                  |           |                  |
|                                | C1         |                            |                  | 1.08                                          | 0.88 to 1.32     |           |                  |           |                  |      |                  |           |                  |
|                                | C2         |                            |                  | 0.96                                          | 0.78 to 1.17     |           |                  |           |                  |      |                  |           |                  |
|                                | D          |                            |                  | 1.26                                          | * 1.02 to 1.55   |           |                  |           |                  |      |                  |           |                  |
|                                | E          |                            |                  | 1.30                                          | * 1.05 to 1.61   |           |                  |           |                  |      |                  |           |                  |
| Education                      | University |                            |                  |                                               |                  | Reference |                  |           |                  |      |                  |           |                  |
|                                | A-level    |                            |                  |                                               |                  | 1.24      | * 1.02 to 1.51   |           |                  |      |                  |           |                  |
|                                | GCSE       |                            |                  |                                               |                  | 1.16      | 0.98 to 1.38     |           |                  |      |                  |           |                  |
|                                | Other      |                            |                  |                                               |                  | 1.20      | 0.93 to 1.56     |           |                  |      |                  |           |                  |
| Employment status              | Full-time  |                            |                  |                                               |                  |           |                  | Reference |                  |      |                  |           |                  |
|                                | Other      |                            |                  |                                               |                  |           |                  | 1.05      | 0.92 to 1.20     |      |                  |           |                  |
| Housing tenure                 | Owned      |                            |                  |                                               |                  |           |                  |           |                  |      |                  | Reference |                  |

11

1  
2  
3  
4  
5  
6  
7  
8  
9  
10  
11  
12  
13  
14  
15  
16  
17  
18  
19  
20  
21  
22  
23  
24  
25  
26  
27  
28  
29  
30  
31  
32  
33  
34  
35  
36  
37  
38  
39  
40  
41  
42  
43  
44  
45  
46

|          |        |      |              |      |    |              |      |    |              |      |      |              |      |    |              |
|----------|--------|------|--------------|------|----|--------------|------|----|--------------|------|------|--------------|------|----|--------------|
|          | Rented |      |              |      |    |              |      |    |              |      | 1.10 | 0.97 to 1.25 |      |    |              |
| Constant |        | 0.49 | 0.24 to 1.02 | 0.34 | ** | 0.15 to 0.75 | 0.31 | ** | 0.14 to 0.69 | 0.36 | *    | 0.17 to 0.78 | 0.35 | ** | 0.16 to 0.76 |

For peer review only

12

### Adjusted models for risky drinking

Results for the demographic-adjusted logistic regression models for alcohol BIs (Table 4) showed a similar age gradient to the smoking models, with all risky drinkers aged 35+ having odds at least twice as high of having received a BI as those under 24 (e.g. OR 2.68 95% CI 1.53 to 4.71 for 65+ year olds). Unlike for smoking, there was a significant gender effect, with women having lower odds of receiving an intervention (OR 0.68 95% CI 0.49 to 0.93). There were no significant effects for region, or time, but again, disability was a significant predictor of BI receipt (OR 3.47 95% CI 2.54 to 4.74).

The addition of behavioural factors to the model (see supplementary material Table S16 for full results) substantially increased the slope of the age gradient, with the OR for over 65s compared to 18-24 year-olds increasing to 5.00 (95% CI 2.71 to 9.23). The effect of disability was reduced, although still significant (OR 2.27 95% CI 1.57 to 3.27) and we saw an additional significant effect for Arab/other ethnic groups compared to the White group (OR 8.64 95% CI 1.81 to 41.21). Of the additional explanatory factors, smoking did not significantly predict BI receipt for alcohol, but motivation to reduce drinking did, with both moderate (OR 2.85 95% CI 2.00 to 4.05) and high levels (OR 5.17 95% CI 3.29 to 8.14) significantly associated with BI receipt. Level of alcohol use was also a very strong predictor of BI receipt, with high risk drinkers having almost 3 times the odds of having received a BI (OR 2.94 95% CI 1.81 to 4.79) and potentially dependent drinkers almost 12 times the odds (OR 11.84 95% CI 7.77 to 18.04).

Adding socioeconomic factors to the model did not further change the magnitude or significance of the other coefficients, but we saw a significant increase in BI receipt for the lowest social grade (E) compared to the highest (OR 2.11 95% CI 1.27 to 3.52). There was no significant effect of education, but not being in full-time employment (OR 1.56 95% CI 1.08 to 2.25) and not being a homeowner (OR 1.55 95% CI 1.09 to 2.20) significantly increased the likelihood of receiving a BI. The effects of all four socioeconomic measures on both smoking and alcohol BI receipt are illustrated in Figure 2, highlighting the relatively larger scale of the socioeconomic gradients for alcohol compared to smoking.

Table 4 - Logistic regression results for factors associated with likelihood of receiving Brief Intervention for risky drinking

|                                 |            | Demographic-adjusted model |              | Behavioural and Socioeconomic-adjusted models |              |          |              |          |              |          |              |
|---------------------------------|------------|----------------------------|--------------|-----------------------------------------------|--------------|----------|--------------|----------|--------------|----------|--------------|
|                                 |            | OR                         | 95% CI       | OR                                            | 95% CI       | OR       | 95% CI       | OR       | 95% CI       | OR       | 95% CI       |
| Age                             | 18-24      | Reference                  |              |                                               |              |          |              |          |              |          |              |
|                                 | 25-34      | 1.56                       | 0.84 to 2.89 | 1.46                                          | 0.77 to 2.78 | 1.46     | 0.76 to 2.80 | 1.60     | 0.82 to 3.14 | 1.51     | 0.79 to 2.85 |
|                                 | 35-44      | 2.49 **                    | 1.39 to 4.47 | 2.05 *                                        | 1.09 to 3.86 | 2.14 *   | 1.13 to 4.07 | 2.42 **  | 1.26 to 4.64 | 2.32 **  | 1.23 to 4.36 |
|                                 | 45-54      | 2.74 ***                   | 1.63 to 4.62 | 2.86 ***                                      | 1.62 to 5.07 | 2.98 *** | 1.65 to 5.39 | 3.33 *** | 1.86 to 5.97 | 3.43 *** | 1.95 to 6.01 |
|                                 | 55-64      | 2.26 **                    | 1.30 to 3.93 | 3.23 ***                                      | 1.76 to 5.92 | 3.20 *** | 1.71 to 5.99 | 3.24 *** | 1.77 to 5.93 | 3.93 *** | 2.11 to 7.33 |
|                                 | 65+        | 2.68 **                    | 1.53 to 4.71 | 4.94 ***                                      | 2.66 to 9.15 | 4.74 *** | 2.50 to 9.02 | 4.41 *** | 2.41 to 8.08 | 6.11 *** | 3.25 to 11.5 |
| Gender                          | Male       | Reference                  |              |                                               |              |          |              |          |              |          |              |
|                                 | Female     | 0.68 *                     | 0.49 to 0.93 | 0.62 **                                       | 0.43 to 0.89 | 0.65 *   | 0.45 to 0.92 | 0.60 **  | 0.42 to 0.85 | 0.64 *   | 0.45 to 0.91 |
| Region                          | North      | Reference                  |              |                                               |              |          |              |          |              |          |              |
|                                 | Midlands   | 1.21                       | 0.84 to 1.73 | 1.20                                          | 0.81 to 1.77 | 1.18     | 0.80 to 1.75 | 1.19     | 0.80 to 1.77 | 1.20     | 0.81 to 1.78 |
|                                 | South      | 0.85                       | 0.62 to 1.16 | 0.84                                          | 0.58 to 1.20 | 0.83     | 0.58 to 1.18 | 0.78     | 0.55 to 1.11 | 0.80     | 0.56 to 1.15 |
| Children in the household       | None       | Reference                  |              |                                               |              |          |              |          |              |          |              |
|                                 | ≥1         | 0.79                       | 0.53 to 1.17 | 1.06                                          | 0.69 to 1.64 | 1.06     | 0.69 to 1.62 | 1.06     | 0.69 to 1.64 | 1.08     | 0.70 to 1.65 |
| Self-reported disability        | No         | Reference                  |              |                                               |              |          |              |          |              |          |              |
|                                 | Yes        | 3.47 ***                   | 2.54 to 4.74 | 1.97 **                                       | 1.34 to 2.90 | 2.16 *** | 1.49 to 3.14 | 2.09 *** | 1.42 to 3.06 | 2.09 *** | 1.43 to 3.04 |
| Ethnicity                       | White      | Reference                  |              |                                               |              |          |              |          |              |          |              |
|                                 | Mixed race | 2.20                       | 0.73 to 6.60 | 2.29                                          | 0.72 to 7.32 | 2.14     | 0.68 to 6.71 | 2.17     | 0.72 to 6.52 | 2.09     | 0.71 to 6.17 |
|                                 | Asian      | 3.44                       | 0.98 to 12.0 | 3.18                                          | 0.66 to 15.4 | 3.47     | 0.69 to 17.4 | 3.47     | 0.70 to 17.2 | 3.17     | 0.65 to 15.5 |
|                                 | Black      | 0.35                       | 0.07 to 1.86 | 0.17                                          | 0.02 to 1.31 | 0.19     | 0.02 to 1.63 | 0.17     | 0.02 to 1.54 | 0.18     | 0.02 to 1.51 |
|                                 | Arab/other | 4.41                       | 0.95 to 20.4 | 9.58 **                                       | 1.98 to 46.4 | 8.29 **  | 1.70 to 40.4 | 8.02 *   | 1.51 to 42.5 | 8.78 **  | 1.77 to 43.5 |
| Time trend (monthly)            |            | 1.00                       | 0.99 to 1.02 | 1.00                                          | 0.98 to 1.02 | 1.00     | 0.98 to 1.02 | 1.00     | 0.98 to 1.02 | 1.00     | 0.98 to 1.02 |
| Past year smoker                | No         | Reference                  |              |                                               |              |          |              |          |              |          |              |
|                                 | Yes        |                            |              | 1.09                                          | 0.79 to 1.52 | 1.17     | 0.84 to 1.62 | 1.16     | 0.84 to 1.62 | 1.07     | 0.77 to 1.49 |
| Motivation to cut down drinking | None       | Reference                  |              |                                               |              |          |              |          |              |          |              |
|                                 | Moderate   |                            |              | 2.94 ***                                      | 2.06 to 4.20 | 2.91 *** | 2.03 to 4.17 | 2.85 *** | 2.00 to 4.06 | 2.93 *** | 2.06 to 4.18 |
|                                 | High       |                            |              | 5.26 ***                                      | 3.33 to 8.30 | 5.27 *** | 3.34 to 8.32 | 5.01 *** | 3.18 to 7.90 | 5.18 *** | 3.29 to 8.14 |
| AUDIT Score                     | 8-15       | Reference                  |              |                                               |              |          |              |          |              |          |              |
|                                 | 16-19      |                            |              | 2.77 ***                                      | 1.68 to 4.56 | 2.81 *** | 1.72 to 4.59 | 2.88 *** | 1.76 to 4.73 | 2.86 *** | 1.75 to 4.69 |
|                                 | 20+        |                            |              | 10.9 ***                                      | 7.12 to 16.6 | 11.7 *** | 7.67 to 17.7 | 11.5 *** | 7.54 to 17.6 | 11.4 *** | 7.47 to 17.5 |
| Social grade                    | AB         | Reference                  |              |                                               |              |          |              |          |              |          |              |
|                                 | C1         |                            |              | 0.97                                          | 0.63 to 1.49 |          |              |          |              |          |              |
|                                 | C2         |                            |              | 0.84                                          | 0.51 to 1.36 |          |              |          |              |          |              |
|                                 | D          |                            |              | 1.20                                          | 0.68 to 2.10 |          |              |          |              |          |              |
|                                 | E          |                            |              | 2.11 **                                       | 1.27 to 3.52 |          |              |          |              |          |              |
| Education                       | University | Reference                  |              |                                               |              |          |              |          |              |          |              |
|                                 | A-level    |                            |              |                                               |              | 1.10     | 0.68 to 1.79 |          |              |          |              |
|                                 | GCSE       |                            |              |                                               |              | 1.12     | 0.73 to 1.71 |          |              |          |              |
|                                 | Other      |                            |              |                                               |              | 1.48     | 0.80 to 2.72 |          |              |          |              |
|                                 | None       |                            |              |                                               |              | 1.45     | 0.86 to 2.44 |          |              |          |              |
| Employment status               | Full-time  | Reference                  |              |                                               |              |          |              |          |              |          |              |
|                                 | Other      |                            |              |                                               |              |          |              | 1.56 *   | 1.08 to 2.25 |          |              |
| Housing tenure                  | Owned      | Reference                  |              |                                               |              |          |              |          |              |          |              |
|                                 | Rented     |                            |              |                                               |              |          |              |          |              | 1.55 *   | 1.09 to 2.20 |

14

|          |      |    |              |      |     |              |      |     |              |      |     |              |      |     |              |
|----------|------|----|--------------|------|-----|--------------|------|-----|--------------|------|-----|--------------|------|-----|--------------|
| Constant | 0.04 | ** | 0.01 to 0.27 | 0.01 | *** | 0.00 to 0.08 | 0.01 | *** | 0.00 to 0.07 | 0.01 | *** | 0.00 to 0.07 | 0.01 | *** | 0.00 to 0.06 |
|----------|------|----|--------------|------|-----|--------------|------|-----|--------------|------|-----|--------------|------|-----|--------------|

INSERT FIGURE 2 ABOUT HERE

For peer review only

1  
2  
3  
4  
5  
6  
7  
8  
9  
10  
11  
12  
13  
14  
15  
16  
17  
18  
19  
20  
21  
22  
23  
24  
25  
26  
27  
28  
29  
30  
31  
32  
33  
34  
35  
36  
37  
38  
39  
40  
41  
42  
43  
44  
45  
46

15

## DISCUSSION

Our findings show that there is a socioeconomic gradient in BI delivery for both smokers and risky drinkers, with those in the lowest socioeconomic groups more likely to receive an intervention, although there is considerable uncertainty around the exact slope of this gradient. This gradient is not accounted for by differences in demographic characteristics or smoking and drinking behaviour and appears to be stronger for alcohol than for smoking. The analysis also illustrates that, despite clinical guidelines recommending BI for both smokers and risky drinkers, an individual who has attended primary care in the past year is 8 times more likely to report receiving an intervention if they are a smoker compared to a risky drinker. For both smoking and drinking there is a clear age gradient, with greater levels of BI delivery in older age groups, in spite of the fact that the highest rates of prevalence of risky drinking being in the youngest age group. Perhaps surprisingly, smokers who were also risky drinkers were less likely to have received a BI for their smoking than those who were not. The very heaviest drinkers, consuming at potentially dependent levels, are almost 12 times more likely to have received an alcohol intervention than those drinking at lower, but still risky, levels. These findings were robust to alternative data assumptions (see supplementary material).

Our study represents, to the best of our knowledge, the first detailed exploration of the potential of BIs for both smoking and alcohol to reduce, or increase, inequalities in health. We used data from a large, nationally representative survey and our findings are based on patients' own reporting of having received an intervention. Whilst such a measure may be subject to recall bias, it likely provides a better indicator of patient experience than routine data recorded by practitioners [33] and is not subject to known biases in practitioner recording [34]. We explored multiple measures of socioeconomic position, finding similar results across all measures, although the effect of increased BI delivery appears more closely associated with low social grade than low levels of education.

There are several important limitations to our study which should be considered alongside our findings. Firstly, our definition of what constitutes a BI is fairly broad, including anyone who reported receiving advice from a primary care practitioner and that there may be unobserved inequalities in the extent to which different groups receive different intensities of intervention or in the quality of content or delivery of the BI. Secondly, patient characteristics, including drinking/smoking status and motivation to cut down or quit, are recorded after the BI has taken place. As a result, we cannot establish whether the strong association between motivation and likelihood of BI receipt is a function of treatment-seeking behaviour in patients who are already motivated to reduce their smoking or drinking, of motivation increasing after receipt of a BI, or of more motivated patients being more likely to recall having received an intervention. Finally, whilst smoking rates in the Toolkit data are very similar to those reported in other national surveys [35], the observed prevalence of risky drinking of 13.1% is substantially lower than other estimates (e.g. 19.7% in the 2014 Adult Psychiatric Morbidity Survey [36]), although it is unclear what effect, if any, this may have on the study results.

Two, much smaller, UK studies conducted in 1996 looked at the relationship between occupation and rates of alcohol BI receipt in risky drinkers, finding no clear socioeconomic gradient [37,38]. Another, Finnish study also found no significant association [39], perhaps suggesting that socioeconomic gradients in BI delivery may not be consistent across different contexts. Previous studies have found similar disparities to those we find between delivery rates of BI for smoking and risky drinking [17,40], as well as similarly higher levels of BI receipt among primary care patients at older ages [41], with greater motivation to quit or cut down [42] and for risky drinkers with higher AUDIT scores [43]. Numerous explanations for the relatively low rate of BI delivery for risky drinking have been suggested, including a lack of training and resources and the attitudes and beliefs of both practitioners and patients [44–46].

16

1  
2  
3 It is not clear why BI delivery appeared highest in lower socioeconomic groups after adjustment for a range of  
4 socio-demographic, drinking and smoking characteristics. Presenting with a chronic disease – likely related to  
5 smoking or alcohol – is associated with receipt of brief intervention [17]. The underlying reason for the GP visit  
6 was not recorded in the current study but it is possible that smoking or alcohol-related illness is more likely to  
7 present in low compared with high SEP smokers or risky drinkers respectively [47].  
8  
9

10 Our analysis focuses on the receipt of Brief Interventions for patients who reported attending Primary Care in the  
11 past year. There are likely to be additional socioeconomic gradients in terms of access to, use of and quality of  
12 Primary Care services which will moderate any overall impact of BIs on health inequalities [48–51]. We should  
13 also consider the potential for differential effectiveness of the intervention across socioeconomic groups. If BIs  
14 are more effective at changing the behaviour of those in higher SEP groups then this may mitigate any potential  
15 inequality-reducing effects. There is little evidence to support the existence of such a gradient in effectiveness for  
16 alcohol [52], although there is some suggestion that this may be in part because lower SEP groups are more likely  
17 to drop out of BI trials [53]. For smoking, a recent study does suggest there may be some degree of inequality in  
18 longer term outcomes for smoking cessation interventions [54]. A holistic view of the full impact of SBI  
19 programmes should consider the impact of these potential SEP gradients, which may attenuate the positive  
20 gradients identified in the present study, alongside existing negative gradients in alcohol- and tobacco-related  
21 harm. Such is the severity of these gradients in harm, with those in the lowest SEP groups experiencing rates of  
22 harm several times greater than those in the highest groups even after adjusting for drinking and smoking  
23 behaviour [8,55], that an intervention could have a negative SEP gradient in terms of its effects on alcohol  
24 consumption and/or smoking, while still reducing overall inequalities. Further research in this area is urgently  
25 needed to understand the full impact that BI programmes may be having on socioeconomic inequalities. This  
26 need is particularly acute given NHS England's recent decision to incentivise secondary care providers to deliver  
27 large scale Brief Intervention programmes for both smoking and risky drinking under the latest Commissioning for  
28 Quality and Innovation (CQUIN) scheme. Although similar gradients in the prevalence of both smoking and risky  
29 drinking as well as associated harm have been observed in many countries [56,57], primary care systems can vary  
30 widely and it is therefore unclear how generalisable our findings are beyond England. Future research into this  
31 area, particularly in Low and Middle Income Countries, could help design SBI programmes to maximise their  
32 potential to reduce inequalities in health.  
33  
34  
35  
36  
37  
38

39 These findings provide the first evidence that Brief Intervention programmes may help reduce inequalities in  
40 smoking- and alcohol-related health although better evidence is needed on the extent to which conflicting  
41 socioeconomic gradients in delivery and, potentially, intervention effectiveness interact with existing gradients in  
42 health. There is considerable scope for the potential effect on inequalities to be increased if intervention rates  
43 can be raised, particularly for drinking.  
44  
45

#### 46 **Author Contributions**

47  
48 CA conceived of and designed the study with input from JB, EB, DG, PB, EK, SM & PM. CA performed the analysis  
49 and wrote the first draft of the paper. All authors commented on this and subsequent versions and read and  
50 approved the final manuscript.  
51

#### 52 **Funding**

53  
54 This work was supported by a research innovation grant from Alcohol Research UK (R2016/01). The ATS is funded  
55 by the National Institute for Health Research (NIHR)'s School for Public Health Research (SPHR). The views are  
56 those of the authors(s) and not necessarily those of the NHS, the NIHR or the Department of Health. SPHR is a  
57 partnership between the Universities of Sheffield; Bristol; Cambridge; Exeter; UCL; The London School for Hygiene  
58 and Tropical Medicine; the LiLaC collaboration between the Universities of Liverpool and Lancaster and Fuse; The  
59  
60



17

Centre for Translational Research in Public Health, a collaboration between Newcastle, Durham, Northumbria, Sunderland and Teesside Universities. The Smoking Toolkit Study is currently primarily funded by Cancer Research UK (C1417/A14135; C36048/A11654; C44576/A19501), and has previously also been funded by Pfizer, GlaxoSmithKline and the Department of Health. JB's post is funded by a fellowship from the Society for the Study of Addiction, and Cancer Research UK also provide support (C1417/A14135).

#### **Disclaimer**

The views are those of the author(s) and not necessarily those of the NHS, NIHR or the Department of Health

#### **Declaration of Interests**

CA, EB and PB's salaries are funded or part-funded by the National Institute for Health Research (NIHR)'s School for Public Health Research (SPHR) and all have received funding from Cancer Research UK (CRUK); EK is a senior investigator in SPHR. JB is funded by CRUK and the Society for the Study of Addiction; SM is funded by CRUK. CA has received funding related to commissioned research from Systembolaget, the Swedish government-owned alcohol retail monopoly. CA and PM have received funding related to commissioned research from Alko, the Finnish government-owned alcohol retail monopoly. JB and EB have both received unrestricted research funding from Pfizer relating to smoking cessation studies.

#### **Ethics approval**

Ethical approval for the Smoking Toolkit Study (STS) was originally granted by the UCL Ethics Committee (ID 0498/001). Approval for the ATS was granted by the same committee as an extension of the STS. The data were collected by Ipsos Mori and anonymised when received by study authors. Explicit verbal agreement and willingness to answer questions voluntarily were recorded electronically by Ipsos Mori. Participants were also given a printed information sheet. This standard was agreed by the UCL ethics committee.

#### **Data sharing statement**

The dataset analysed during the current study are available from the corresponding author on reasonable request.

## REFERENCES

- 1 Forouzanfar MH, Afshin A, Alexander LT, *et al*. Global, regional, and national comparative risk assessment of 79 behavioural, environmental and occupational, and metabolic risks or clusters of risks, 1990–2015: a systematic analysis for the Global Burden of Disease Study 2015. *Lancet* 2016;**388**:1659–724. doi:10.1016/S0140-6736(16)31679-8
- 2 Sieglar V, Al-Hamad A, B J, *et al*. Social inequalities in alcohol-related adult mortality by National Statistics Socio-economic Classifications, England and Wales 2001-03. *Heal Stat Q* 2011;**50**.<http://www.ons.gov.uk/ons/rel/hsq/health-statistics-quarterly/no--50--summer-2011/social-inequalities-in-alcohol-related-adult-mortality-by-national-statistics-socio-economic-classification--england-and-wales--2001-03.pdf>
- 3 Marmot M. Fair society, healthy lives, the Marmot review. 2010. <http://www.instituteofhealthequity.org/projects/fair-society-healthy-lives-the-marmot-review>
- 4 Hiscock R, Bauld L, Amos A, *et al*. Socioeconomic status and smoking: a review. *Ann N Y Acad Sci* 2012;**1248**:107–23. doi:10.1111/j.1749-6632.2011.06202.x
- 5 Holmes J, Meng Y, Meier PS, *et al*. Effects of minimum unit pricing for alcohol on different income and socioeconomic groups: a modelling study. *Lancet* 2014;**383**:1655–64. doi:10.1016/S0140-6736(13)62417-4
- 6 Lewer D, Meier P, Beard E, *et al*. Unravelling the alcohol harm paradox: a population-based study of social gradients across very heavy drinking thresholds. *BMC Public Health* 2016;**16**:599. doi:10.1186/s12889-016-3265-9
- 7 Bellis MA, Hughes K, Nicholls J, *et al*. The alcohol harm paradox: using a national survey to explore how alcohol may disproportionately impact health in deprived individuals. *BMC Public Health* 2016;**16**:111. doi:10.1186/s12889-016-2766-x
- 8 Katikireddi SV, Whitley E, Lewsey J, *et al*. Socioeconomic status as an effect modifier of alcohol consumption and harm: analysis of linked cohort data. *Lancet Public Heal* Published Online First: May 2017. doi:10.1016/S2468-2667(17)30078-6
- 9 Beard E, Brown J, West R, *et al*. Deconstructing the Alcohol Harm Paradox: A population based survey of adults in England. *PLoS One* 2016;**11**:e0160666. doi:10.1371/journal.pone.0160666
- 10 Stead L, Bergson G, Lancaster T. Physician advice for smoking cessation. *Cochrane Libr* Published Online First: 2008.<http://onlinelibrary.wiley.com/doi/10.1002/14651858.CD000165.pub3/full>
- 11 Aveyard P, Begh R, Parsons A, *et al*. Brief opportunistic smoking cessation interventions: a systematic review and meta-analysis to compare advice to quit and offer of assistance. *Addiction* Published Online First: 2012.<http://onlinelibrary.wiley.com/doi/10.1111/j.1360-0443.2011.03770.x/full>
- 12 Kaner EF, Beyer FR, Muirhead C, *et al*. Effectiveness of brief alcohol interventions in primary care populations. *Cochrane Database Syst Rev* Published Online First: 24 February 2018. doi:10.1002/14651858.CD004148.pub4
- 13 Angus C, Latimer N, Preston L, *et al*. What are the implications for policy makers? A systematic review of the cost-effectiveness of screening and brief interventions for alcohol misuse in primary care. *Front. Psychiatry*. 2014;**5**. doi:10.3389/fpsy.2014.00114
- 14 National Institute of Health and Clinical Excellence (NICE). Stop smoking interventions and services: NICE guideline [NG92]. 2018.<https://www.nice.org.uk/guidance/ng92>
- 15 National Institute of Health and Clinical Excellence (NICE). PH24 Alcohol-use disorders: preventing harmful drinking. 2010. [www.nice.org.uk/guidance/ph24](http://www.nice.org.uk/guidance/ph24)
- 16 Department of Health, Public Health England. NHS health check programme: best practice guidance. London: 2013. <http://www.healthcheck.nhs.uk/document.php?o=456>
- 17 Taggar JS, Coleman T, Lewis S, *et al*. The impact of the Quality and Outcomes Framework (QOF) on the recording of smoking targets in primary care medical records: cross-sectional analyses from The Health Improvement Network (THIN) database. *BMC Public Health* 2012;**12**:329. doi:10.1186/1471-2458-12-329
- 18 Brown J, West R, Angus C, *et al*. Comparison of brief interventions in primary care on smoking and excessive alcohol consumption: A population survey in England. *Br J Gen Pract* 2016;**66**:e1–9. doi:10.3399/bjgp16X683149
- 19 Anderson P, Bendtsen P, Spak F, *et al*. Improving the delivery of brief interventions for heavy drinking in

- 19
- 1  
2  
3 primary health care: outcome results of the Optimizing Delivery of Health Care Intervention (ODHIN) five-  
4 country cluster randomized factorial trial. *Addiction* Published Online First: 2016. doi:10.1111/add.13476  
5  
6 20 Denny CH, Hungerford DW, McKnight-Eily LR, *et al.* Self-Reported Prevalence of Alcohol Screening Among  
7 U.S. Adults. *Am J Prev Med* 2016;**50**:380–3. doi:10.1016/j.amepre.2015.09.016  
8  
9 21 Rehm J, Allamani A, Della Vedova R, *et al.* General practitioners recognizing alcohol dependence: a large  
10 cross-sectional study in 6 European countries. *Ann Fam Med* 2015;**13**:28–32. doi:10.1370/afm.1742  
11  
12 22 Lorenc T, Petticrew M, Welch V, *et al.* What types of interventions generate inequalities? Evidence from  
13 systematic reviews. *J Epidemiol Community Health* 2013;**67**:190–3. doi:10.1136/jech-2012-201257  
14  
15 23 White M, Heywood P. How and why do interventions that increase health overall widen inequalities within  
16 populations? In: Babones S, ed. *Health, Inequality and society*. Bristol: : Policy Press 2009.  
17  
18 24 Beard E, Brown J, West R, *et al.* Protocol for a national monthly survey of alcohol use in England with 6-  
19 month follow-up: 'The Alcohol Toolkit Study'. *BMC public* Published Online First:  
20 2015. <http://bmcpublihealth.biomedcentral.com/articles/10.1186/s12889-015-1542-7>  
21  
22 25 Fidler J, Shahab L, West O. 'The smoking toolkit study': a national study of smoking and smoking cessation  
23 in England. *BMC Public* Published Online First:  
24 2011. <http://bmcpublihealth.biomedcentral.com/articles/10.1186/1471-2458-11-479>  
25  
26 26 Babor TF, Higgins-Biddle JC, Saunders JB, *et al.* *The Alcohol Use Disorders Identification Test Guidelines for*  
27 *Use in Primary Care*. World Health Organization 2001. doi:10.1177/0269881110393051  
28  
29 27 Collis D. Social grade: A classification tool - Bite sized thought piece. 2009. [https://www.ipsos-](https://www.ipsos-mori.com/DownloadPublication/1285_MediaCT_thoughtpiece_Social_Grade_July09_V3_WEB.pdf)  
30 [mori.com/DownloadPublication/1285\\_MediaCT\\_thoughtpiece\\_Social\\_Grade\\_July09\\_V3\\_WEB.pdf](https://www.ipsos-mori.com/DownloadPublication/1285_MediaCT_thoughtpiece_Social_Grade_July09_V3_WEB.pdf)  
31  
32 28 Graham JW, Olchowski AE, Gilreath TD. How many imputations are really needed? Some practical  
33 clarifications of multiple imputation theory. *Prev Sci* 2007;**8**:206–13. doi:10.1007/s11121-007-0070-9  
34  
35 29 Rubin DB. Multiple Imputation after 18+ Years. *J Am Stat Assoc* 1996;**91**:473–89.  
36 doi:10.1080/01621459.1996.10476908  
37  
38 30 StataCorp. Stata Statistical Software: Release 12. 2011.  
39  
40 31 Box GEP, Tidwell PW. Transformation of the Independent Variables. *Technometrics* 1962;**4**:531.  
41 doi:10.2307/1266288  
42  
43 32 Vandebroucke JP, Von Elm E, Altman DG, *et al.* Strengthening the Reporting of Observational Studies in  
44 Epidemiology (STROBE): Explanation and elaboration. *Ann. Intern. Med.* 2007;**147**:806–8.  
45 doi:10.1136/bmj.39335.541782.AD  
46  
47 33 Wilson A, McDonald P. Comparison of patient questionnaire, medical record, and audio tape in  
48 assessment of health promotion in general practice consultations. *BMJ* 1994;**309**:1483–  
49 5. <http://www.ncbi.nlm.nih.gov/pubmed/7804055> (accessed 21 Nov 2016).  
50  
51 34 Szatkowski L, McNeill A, Lewis S, *et al.* A comparison of patient recall of smoking cessation advice with  
52 advice recorded in electronic medical records. doi:10.1186/1471-2458-11-291  
53  
54 35 Health and Social Care Information Centre. Health Survey for England 2014. 2015.  
55  
56 36 Office for National Statistics. Adult Psychiatric Morbidity Survey 2014. 2016.  
57  
58 37 Kaner EF, Heather N, Brodie J, *et al.* Patient and practitioner characteristics predict brief alcohol  
59 intervention in primary care. *Br J Gen Pract* 2001;**51**:822–  
60 7. <http://www.ncbi.nlm.nih.gov/pubmed/11677706> (accessed 17 Nov 2016).  
61  
62 38 Lock CA, Kaner EFS. Implementation of brief alcohol interventions by nurses in primary care: do non-  
63 clinical factors influence practice? *Fam Pract* 2004;**21**:270–5. doi:10.1093/FAMPRA/CMH310  
64  
65 39 Mäkelä P, Havio M, Seppä K. Alcohol-related discussions in health care—a population view. *Addiction*  
66 2011;**106**:1239–48. doi:10.1111/j.1360-0443.2010.03356.x  
67  
68 40 Khadjesari Z, Marston L, Petersen I, *et al.* Alcohol consumption screening of newly-registered patients in  
69 primary care: a cross-sectional analysis. *Br J Gen Pract* 2013;**63**:e706-12. doi:10.3399/bjgp13X673720  
70  
71 41 Denny CH, Serdula MK, Holtzman D, *et al.* Physician advice about smoking and drinking: Are U.S. adults  
72 being informed? *Am J Prev Med* 2003;**24**:71–4. doi:10.1016/S0749-3797(02)00568-8  
73  
74 42 Kotz D, Fidler J, West R. Factors associated with the use of aids to cessation in English smokers. *Addiction*  
75 2009;**104**:1403–10. doi:10.1111/j.1360-0443.2009.02639.x  
76  
77 43 Cheeta S, Drummond C, Oyefeso A, *et al.* Low identification of alcohol use disorders in general practice in

20

- 1  
2  
3  
4  
5  
6  
7  
8  
9  
10  
11  
12  
13  
14  
15  
16  
17  
18  
19  
20  
21  
22  
23  
24  
25  
26  
27  
28  
29  
30  
31  
32  
33  
34  
35  
36  
37  
38  
39  
40  
41  
42  
43  
44
- England. *Addiction* 2008;**103**:766–73. doi:10.1111/j.1360-0443.2008.02198.x
- 44 O'Donnell A, Kaner E. Are brief alcohol interventions adequately embedded in UK primary care? A qualitative study utilising normalisation process theory. *Int J Environ Res Public Health* 2017;**14**:350. doi:10.3390/ijerph14040350
- 45 O'Donnell A, Abidi L, Brown J, *et al.* Beliefs and attitudes about addressing alcohol consumption in health care: a population survey in England. *BMC Public Health* 2018;**18**:391. doi:10.1186/s12889-018-5275-2
- 46 Kaner E, Rapley T, May C. Seeing through the glass darkly? A qualitative exploration of GPs' drinking and their alcohol intervention practices. *Fam Pract* 2006;**23**:481–7. doi:10.1093/fampra/cml015
- 47 Sadler S, Angus C, Gavens L, *et al.* Understanding the alcohol harm paradox: an analysis of sex- and condition-specific hospital admissions by socio-economic group for alcohol-associated conditions in England. *Addiction* 2017;**112**. doi:10.1111/add.13726
- 48 McLean G, Sutton M, Guthrie B. Deprivation and quality of primary care services: evidence for persistence of the inverse care law from the UK Quality and Outcomes Framework. *J Epidemiol Community Health* 2006;**60**:917–22. doi:10.1136/jech.2005.044628
- 49 Ellis DA, McQueenie R, McConnachie A, *et al.* Demographic and practice factors predicting repeated non-attendance in primary care: a national retrospective cohort analysis. *Lancet Public Heal* 2017;**2**:e551–9. doi:10.1016/S2468-2667(17)30217-7
- 50 Gulliford MC. Availability of primary care doctors and population health in England: is there an association? *J Public Health Med* 2002;**24**:252–4. doi:10.1093/PUBMED/24.4.252
- 51 Watt G. The inverse care law today. *Lancet* Published Online First: 2002.<http://www.thelancet.com/pdfs/journals/lancet/PIIS0140673602094667.pdf> (accessed 22 Nov 2016).
- 52 Littlejohn C. Does socio-economic status influence the acceptability of, attendance for, and outcome of, screening and brief interventions for alcohol misuse: a review. *Alcohol Alcohol*. 2006;**41**:540–5.<http://ovidsp.ovid.com/ovidweb.cgi?T=JS&PAGE=reference&D=med4&NEWS=N&AN=16855002>
- 53 Edwards AGK, Rollnick S. Outcome studies of brief alcohol intervention in general practice: The problem of lost subjects. *Addiction* 1997;**92**:1699–704. doi:10.1111/j.1360-0443.1997.tb02890.x
- 54 Bauld L, Hiscock R, Dobbie F, *et al.* English Stop-Smoking Services: One-Year Outcomes. *Int J Environ Res Public Health* 2016;**13**:1175. doi:10.3390/ijerph13121175
- 55 Hiscock R, Bauld L, Amos A, *et al.* Socioeconomic status and smoking: a review. *Ann N Y Acad Sci* 2012;**1248**:107–23. doi:10.1111/j.1749-6632.2011.06202.x
- 56 Sassi F, Belloni A, Mirelman AJ, *et al.* Equity impacts of price policies to promote healthy behaviours. *Lancet (London, England)* 2018;**391**:2059–70. doi:10.1016/S0140-6736(18)30531-2
- 57 Mackenbach JP, Stirbu I, Roskam A-JR, *et al.* Socioeconomic Inequalities in Health in 22 European Countries. *N Engl J Med* 2008;**358**:2468–81. doi:10.1056/NEJMsa0707519

## 45 FIGURE LEGENDS

46  
47 **Figure 1 - Unadjusted socioeconomic gradients in prevalence, GP attendance and BI receipt for smokers and**  
48 **risky drinkers**

49  
50  
51 **Figure 2 - Independent, fully-adjusted, association of socioeconomic position with Odds Ratio of receiving a**  
52 **Brief Intervention for smoking or risky drinking**



Unadjusted socioeconomic gradients in prevalence, GP attendance and BI receipt for smokers and risky drinkers

254x254mm (300 x 300 DPI)



Independent, fully-adjusted, association of socioeconomic position with Odds Ratio of receiving a Brief Intervention for smoking or risky drinking

254x254mm (300 x 300 DPI)

1

## The association between socioeconomic status and receipt of Brief Interventions for smoking and drinking: analysis of a population-based household survey: Supplementary material

### Smoker definition

'Past-year smokers' were defined as those who responded to the question 'Do you smoke or have you ever smoked' with 'I smoke cigarettes (including hand-rolled) every day', 'I smoke cigarettes (including hand-rolled), but not every day', 'I do not smoke cigarettes at all, but I do smoke tobacco of some kind (e.g. pipe, cigar or shisha)' or 'I have stopped smoking completely in the last year'. E-cigarettes were specifically excluded from the definition of cigarettes in the question. Recent quitters were included in the sample to capture individuals who may have given up following a BI received in primary care.

### Outcome measures

Among smokers, BI receipt was assessed by asking 'Has your GP spoken to you about smoking in the past year (i.e. last 12 months)?' Respondents were encouraged to select all options that applied and were classified into those who received a BI (those selecting at least one of four options: i) 'Yes, he/she advised me to stop but did not offer anything'; ii) 'Yes, he/she suggested that I go to a specialist stop smoking advisor or group'; iii) 'Yes, he/she suggested that I see a nurse in the practice'; iv) 'Yes, he/she offered me a prescription for Champix/Zyban, a nicotine patch, nicotine gum or other nicotine product') and those who did not (i.e. those who did not select any of options i) to iv) but did select one of 'No, I have seen my GP in the last year but he/she has not spoken to me about smoking' or 'Yes, he/she asked me about my smoking but did not advise me to stop smoking').

Among risky drinkers, BI receipt was assessed by asking 'In the last 12 months, has a doctor or other health worker within your GP surgery discussed your drinking?' Respondents were encouraged to select all options that applied and were classified into those who received a BI (those selecting at least one of three options: i) 'Yes, a doctor or other health worker within my GP surgery offered advice about cutting down my drinking'; ii) 'Yes, a doctor or other health worker within my GP surgery offered help or support within the surgery to help me cut down'; iii) 'Yes, a doctor or other health worker within my GP surgery referred me to an alcohol service or advised me to seek specialist help') and those who did not (i.e. those who did not select any of options i) to iii) but did select one of 'No, I have seen a doctor or health worker within my GP surgery but did not discuss my drinking' or 'Yes, a doctor or other health worker within my GP surgery asked about my drinking').

2

## Analysis using unweighted data

**Table S1 - Descriptive analysis of prevalence, GP attendance and BI delivery rates for smokers and risky drinkers by socioeconomic status (unweighted, 95% Confidence Intervals in brackets)**

|                |            | Past year smokers        |                         |                          | Risky drinkers           |                         |                          |
|----------------|------------|--------------------------|-------------------------|--------------------------|--------------------------|-------------------------|--------------------------|
|                |            | Prevalence in population | Visited GP in past year | Received BI   visited GP | Prevalence in population | Visited GP in past year | Received BI   visited GP |
| Population     |            | 20.6% (20.3 to 21)       | 64.8% (63.9 to 65.7)    | 49.7% (48.5 to 50.9)     | 12.6% (12.3 to 12.7)     | 65.4% (64.2 to 66)      | 6.5% (5.7 to 6.9)        |
| Social grade   |            |                          |                         |                          |                          |                         |                          |
|                | AB         | 11.2% (10.6 to 11.8)     | 65.1% (62.4 to 67.9)    | 47.5% (43.9 to 51)       | 13.6% (12.9 to 13.9)     | 69.4% (67 to 70.7)      | 5.6% (4.2 to 6.4)        |
|                | C1         | 17.5% (16.9 to 18.1)     | 64.4% (62.6 to 66.3)    | 48.6% (46.2 to 51)       | 14.3% (13.8 to 14.6)     | 66% (64 to 67)          | 5% (3.9 to 5.6)          |
|                | C2         | 23.4% (22.5 to 24.2)     | 61.3% (59.3 to 63.3)    | 46.6% (44.1 to 49.2)     | 12.2% (11.5 to 12.5)     | 61.9% (59.2 to 63.3)    | 5.2% (3.6 to 6.1)        |
|                | D          | 26.8% (25.8 to 27.8)     | 63.9% (61.8 to 66)      | 50.5% (47.8 to 53.2)     | 9.3% (8.7 to 9.7)        | 65.3% (61.8 to 67)      | 6.9% (4.6 to 8)          |
|                | E          | 34.3% (33 to 35.5)       | 70.5% (68.5 to 72.6)    | 55.2% (52.4 to 57.9)     | 10.9% (10.1 to 11.4)     | 60.5% (56.5 to 62.5)    | 17% (13.1 to 19.1)       |
| Education      |            |                          |                         |                          |                          |                         |                          |
|                | University | 12.7% (12.2 to 13.3)     | 61.9% (59.6 to 64.2)    | 45.8% (42.8 to 48.8)     | 12.7% (12.1 to 13)       | 67.1% (64.9 to 68.2)    | 5.5% (4.2 to 6.2)        |
|                | A-level    | 20.8% (20 to 21.6)       | 62.1% (59.9 to 64.3)    | 49.3% (46.4 to 52.1)     | 18.7% (17.9 to 19.1)     | 58.8% (56.4 to 60)      | 4.8% (3.5 to 5.5)        |
|                | GCSE       | 25.7% (25 to 26.4)       | 65.4% (63.8 to 66.9)    | 48.4% (46.4 to 50.5)     | 12.6% (12 to 12.9)       | 66.8% (64.5 to 67.9)    | 7% (5.5 to 7.8)          |
|                | Other      | 18.2% (17 to 19.5)       | 66.5% (63 to 69.9)      | 51.3% (46.8 to 55.8)     | 10.9% (9.9 to 11.4)      | 71.2% (66.8 to 73.4)    | 7.6% (4.6 to 9.2)        |
|                | None       | 25.9% (25 to 26.9)       | 67.8% (65.9 to 69.8)    | 54% (51.5 to 56.6)       | 6.7% (6.1 to 6.9)        | 70.7% (66.9 to 72.6)    | 11% (7.9 to 12.5)        |
| Employment     |            |                          |                         |                          |                          |                         |                          |
|                | Full time  | 22.1% (21.4 to 22.7)     | 57.2% (55.5 to 58.8)    | 46.9% (44.8 to 49.1)     | 15.9% (15.3 to 16.2)     | 60.7% (58.8 to 61.6)    | 4.3% (3.3 to 4.8)        |
|                | Other      | 19.9% (19.5 to 20.4)     | 69.1% (67.9 to 70.2)    | 51% (49.5 to 52.5)       | 10.9% (10.5 to 11.1)     | 68.8% (67.3 to 69.6)    | 7.8% (6.8 to 8.4)        |
| Housing tenure |            |                          |                         |                          |                          |                         |                          |
|                | Owner      | 13.2% (12.8 to 13.6)     | 65.8% (64.3 to 67.3)    | 49.2% (47.2 to 51.1)     | 11.6% (11.2 to 11.8)     | 68.9% (67.3 to 69.7)    | 5.4% (4.5 to 5.9)        |
|                | Renter     | 32.5% (31.8 to 33.2)     | 64.5% (63.3 to 65.7)    | 50.2% (48.6 to 51.8)     | 14.2% (13.7 to 14.5)     | 61.1% (59.3 to 62.1)    | 8.1% (6.7 to 8.8)        |



3

**Table S2 – Unweighted logistic regression results for factors associated with likelihood of receiving Brief Intervention for smoking: demographic- and behaviour-adjusted models**

|                                |            | Demographic-adjusted model |                  | Behaviour-adjusted model |                  |
|--------------------------------|------------|----------------------------|------------------|--------------------------|------------------|
|                                |            | OR                         | 95% CI           | OR                       | 95% CI           |
| Age                            | 18-24      | Reference                  |                  |                          |                  |
|                                | 25-34      | 1.36                       | *** 1.14 to 1.61 | 1.32                     | ** 1.1 to 1.59   |
|                                | 35-44      | 1.59                       | *** 1.33 to 1.9  | 1.60                     | *** 1.33 to 1.93 |
|                                | 45-54      | 2.02                       | *** 1.7 to 2.41  | 2.01                     | *** 1.67 to 2.42 |
|                                | 55-64      | 2.25                       | *** 1.88 to 2.7  | 2.31                     | *** 1.9 to 2.8   |
|                                | 65+        | 2.06                       | *** 1.71 to 2.48 | 2.16                     | *** 1.77 to 2.63 |
| Gender                         | Male       | Reference                  |                  |                          |                  |
|                                | Female     | 1.00                       | 0.91 to 1.11     | 0.98                     | 0.88 to 1.09     |
| Region                         | North      | Reference                  |                  |                          |                  |
|                                | Midlands   | 0.93                       | 0.82 to 1.06     | 0.92                     | 0.81 to 1.05     |
|                                | South      | 0.87                       | * 0.78 to 0.98   | 0.86                     | * 0.76 to 0.97   |
| Children in the household      | None       | Reference                  |                  |                          |                  |
|                                | ≥1         | 1.12                       | 0.99 to 1.26     | 1.07                     | 0.94 to 1.21     |
| Self-reported disability       | No         | Reference                  |                  |                          |                  |
|                                | Yes        | 1.43                       | *** 1.25 to 1.62 | 1.45                     | *** 1.26 to 1.66 |
| Ethnicity                      | White      | Reference                  |                  |                          |                  |
|                                | Mixed race | 0.83                       | 0.56 to 1.22     | 0.78                     | 0.52 to 1.17     |
|                                | Asian      | 0.94                       | 0.75 to 1.18     | 0.89                     | 0.7 to 1.12      |
|                                | Black      | 1.29                       | 0.92 to 1.81     | 1.12                     | 0.78 to 1.61     |
|                                | Arab/other | 1.04                       | 0.62 to 1.73     | 1.00                     | 0.57 to 1.76     |
| Time trend (monthly)           |            | 1.00                       | 0.99 to 1        | 1.00                     | 0.99 to 1.01     |
| Risky drinker (AUDIT 8+)       | No         | Reference                  |                  |                          |                  |
|                                | Yes        |                            |                  | 0.89                     | 0.78 to 1.01     |
| Motivation to cut down smoking | None       | Reference                  |                  |                          |                  |
|                                | Moderate   |                            |                  | 1.42                     | *** 1.25 to 1.6  |
|                                | High       |                            |                  | 2.21                     | *** 1.87 to 2.61 |
| Constant                       |            | 0.60                       | 0.31 to 1.19     | 0.46                     | * 0.23 to 0.95   |

Key: \* p<0.05, \*\* p<0.01, \*\*\*, p<0.001

4

**Table S3 - Unweighted logistic regression results for factors associated with likelihood of receiving Brief Intervention for smoking: socioeconomic adjusted models 1 & 2**

|                                |            | Socioeconomic-adjusted models 1 & 2 |                  |      |                  |
|--------------------------------|------------|-------------------------------------|------------------|------|------------------|
|                                |            | OR                                  | 95% CI           | OR   | 95% CI           |
| Age                            | 18-24      | Reference                           |                  |      |                  |
|                                | 25-34      | 1.35                                | ** 1.12 to 1.62  | 1.34 | ** 1.12 to 1.61  |
|                                | 35-44      | 1.64                                | *** 1.36 to 1.98 | 1.63 | *** 1.35 to 1.97 |
|                                | 45-54      | 2.05                                | *** 1.7 to 2.47  | 2.04 | *** 1.7 to 2.46  |
|                                | 55-64      | 2.36                                | *** 1.94 to 2.87 | 2.31 | *** 1.89 to 2.81 |
|                                | 65+        | 2.22                                | *** 1.82 to 2.72 | 2.13 | *** 1.73 to 2.62 |
| Gender                         | Male       | Reference                           |                  |      |                  |
|                                | Female     | 0.96                                | 0.86 to 1.08     | 0.98 | 0.88 to 1.09     |
| Region                         | North      | Reference                           |                  |      |                  |
|                                | Midlands   | 0.93                                | 0.82 to 1.06     | 0.92 | 0.81 to 1.05     |
|                                | South      | 0.87                                | * 0.77 to 0.99   | 0.86 | * 0.76 to 0.98   |
| Children in the household      | None       | Reference                           |                  |      |                  |
|                                | ≥1         | 1.05                                | 0.92 to 1.2      | 1.06 | 0.93 to 1.21     |
| Self-reported disability       | No         | Reference                           |                  |      |                  |
|                                | Yes        | 1.38                                | *** 1.2 to 1.58  | 1.42 | *** 1.24 to 1.63 |
| Ethnicity                      | White      | Reference                           |                  |      |                  |
|                                | Mixed race | 0.77                                | 0.51 to 1.16     | 0.79 | 0.52 to 1.19     |
|                                | Asian      | 0.86                                | 0.68 to 1.09     | 0.89 | 0.7 to 1.12      |
|                                | Black      | 1.10                                | 0.77 to 1.58     | 1.12 | 0.78 to 1.62     |
|                                | Arab/other | 1.01                                | 0.58 to 1.78     | 1.01 | 0.57 to 1.76     |
| Time trend (monthly)           |            | 1.00                                | 0.99 to 1.01     | 1.00 | 0.99 to 1.01     |
| Risky drinker (AUDIT 8+)       | No         | Reference                           |                  |      |                  |
|                                | Yes        | 0.90                                | 0.79 to 1.03     | 0.90 | 0.79 to 1.02     |
| Motivation to cut down smoking | None       | Reference                           |                  |      |                  |
|                                | Moderate   | 1.43                                | *** 1.26 to 1.62 | 1.43 | *** 1.26 to 1.61 |
|                                | High       | 2.25                                | *** 1.9 to 2.66  | 2.23 | *** 1.89 to 2.64 |
| Social grade                   | AB         | Reference                           |                  |      |                  |
|                                | C1         | 1.09                                | 0.9 to 1.31      |      |                  |
|                                | C2         | 0.92                                | 0.76 to 1.12     |      |                  |
|                                | D          | 1.21                                | 0.99 to 1.47     |      |                  |
|                                | E          | 1.29                                | * 1.06 to 1.58   |      |                  |
| Education                      | University | Reference                           |                  |      |                  |
|                                | A-level    |                                     |                  | 1.20 | * 1 to 1.45      |
|                                | GCSE       |                                     |                  | 1.10 | 0.94 to 1.29     |
|                                | Other      |                                     |                  | 1.16 | 0.92 to 1.48     |
|                                | None       |                                     |                  | 1.22 | * 1.02 to 1.46   |
| Constant                       |            | 0.44                                | * 0.21 to 0.92   | 0.41 | * 0.19 to 0.85   |

Key: \* p<0.05, \*\* p<0.01, \*\*\*, p<0.001

**Table S4 - Unweighted logistic regression results for factors associated with likelihood of receiving Brief Intervention for smoking: socioeconomic-adjusted models 3 & 4**

|                                |            | Socioeconomic-adjusted models 3 & 4 |                  |      |                  |
|--------------------------------|------------|-------------------------------------|------------------|------|------------------|
|                                |            | OR                                  | 95% CI           | OR   | 95% CI           |
| Age                            | 18-24      | Reference                           |                  |      |                  |
|                                | 25-34      | 1.34                                | ** 1.12 to 1.61  | 1.32 | ** 1.11 to 1.59  |
|                                | 35-44      | 1.62                                | *** 1.34 to 1.96 | 1.63 | *** 1.35 to 1.97 |
|                                | 45-54      | 2.03                                | *** 1.69 to 2.45 | 2.07 | *** 1.72 to 2.5  |
|                                | 55-64      | 2.31                                | *** 1.9 to 2.8   | 2.41 | *** 1.97 to 2.94 |
|                                | 65+        | 2.12                                | *** 1.73 to 2.59 | 2.27 | *** 1.85 to 2.78 |
| Gender                         | Male       | Reference                           |                  |      |                  |
|                                | Female     | 0.97                                | 0.87 to 1.08     | 0.98 | 0.87 to 1.09     |
| Region                         | North      | Reference                           |                  |      |                  |
|                                | Midlands   | 0.93                                | 0.81 to 1.06     | 0.93 | 0.81 to 1.06     |
|                                | South      | 0.86                                | * 0.76 to 0.97   | 0.85 | * 0.75 to 0.96   |
| Children in the household      | None       | Reference                           |                  |      |                  |
|                                | ≥1         | 1.06                                | 0.93 to 1.21     | 1.06 | 0.93 to 1.21     |
| Self-reported disability       | No         | Reference                           |                  |      |                  |
|                                | Yes        | 1.42                                | *** 1.24 to 1.63 | 1.41 | *** 1.22 to 1.62 |
| Ethnicity                      | White      | Reference                           |                  |      |                  |
|                                | Mixed race | 0.78                                | 0.52 to 1.17     | 0.77 | 0.51 to 1.16     |
|                                | Asian      | 0.88                                | 0.7 to 1.12      | 0.91 | 0.71 to 1.15     |
|                                | Black      | 1.12                                | 0.78 to 1.61     | 1.11 | 0.77 to 1.6      |
|                                | Arab/other | 1.01                                | 0.58 to 1.77     | 0.98 | 0.56 to 1.73     |
| Time trend (monthly)           |            | 1.00                                | 0.99 to 1.01     | 1.00 | 0.99 to 1.01     |
| Risky drinker (AUDIT 8+)       | No         | Reference                           |                  |      |                  |
|                                | Yes        | 0.89                                | 0.78 to 1.02     | 0.89 | 0.78 to 1.02     |
| Motivation to cut down smoking | None       | Reference                           |                  |      |                  |
|                                | Moderate   | 1.42                                | *** 1.26 to 1.61 | 1.43 | *** 1.26 to 1.61 |
|                                | High       | 2.22                                | *** 1.88 to 2.62 | 2.22 | *** 1.88 to 2.63 |
| Employment status              | Full-time  | Reference                           |                  |      |                  |
|                                | Other      | 1.07                                | 0.95 to 1.22     |      |                  |
| Housing tenure                 | Owned      | Reference                           |                  |      |                  |
|                                | Rented     |                                     |                  | 1.14 | * 1.01 to 1.27   |
| Constant                       |            | 0.45                                | * 0.22 to 0.92   | 0.43 | * 0.21 to 0.88   |

Key: \* p<0.05, \*\* p<0.01, \*\*\*, p<0.001

6

**Table S5 - Unweighted logistic regression results for factors associated with likelihood of receiving Brief Intervention for risky alcohol use: demographic- and behaviour-adjusted models**

|                                 |            | Demographic-adjusted model |                  | Behaviour-adjusted model |                   |
|---------------------------------|------------|----------------------------|------------------|--------------------------|-------------------|
|                                 |            | OR                         | 95% CI           | OR                       | 95% CI            |
| Age                             | 18-24      | Reference                  |                  |                          |                   |
|                                 | 25-34      | 1.77                       | 1 to 3.15        | 1.62                     | 0.87 to 3.03      |
|                                 | 35-44      | 2.92                       | *** 1.7 to 5     | 2.52                     | ** 1.41 to 4.53   |
|                                 | 45-54      | 3.22                       | *** 1.98 to 5.24 | 3.44                     | *** 2.03 to 5.82  |
|                                 | 55-64      | 2.41                       | ** 1.45 to 4.01  | 3.52                     | *** 2.03 to 6.13  |
|                                 | 65+        | 2.54                       | *** 1.52 to 4.25 | 4.72                     | *** 2.68 to 8.3   |
| Gender                          | Male       | Reference                  |                  |                          |                   |
|                                 | Female     | 0.72                       | * 0.53 to 0.96   | 0.67                     | * 0.48 to 0.93    |
| Region                          | North      | Reference                  |                  |                          |                   |
|                                 | Midlands   | 1.26                       | 0.9 to 1.75      | 1.30                     | 0.9 to 1.88       |
|                                 | South      | 1.01                       | 0.75 to 1.36     | 0.96                     | 0.69 to 1.34      |
| Children in the household       | None       | Reference                  |                  |                          |                   |
|                                 | ≥1         | 0.72                       | 0.5 to 1.04      | 0.95                     | 0.64 to 1.41      |
| Self-reported disability        | No         | Reference                  |                  |                          |                   |
|                                 | Yes        | 2.91                       | *** 2.16 to 3.91 | 1.91                     | *** 1.36 to 2.68  |
| Ethnicity                       | White      | Reference                  |                  |                          |                   |
|                                 | Mixed race | 1.45                       | 0.5 to 4.19      | 1.61                     | 0.51 to 5.09      |
|                                 | Asian      | 2.15                       | 0.73 to 6.28     | 1.76                     | 0.51 to 6.08      |
|                                 | Black      | 0.78                       | 0.18 to 3.33     | 0.61                     | 0.13 to 2.88      |
|                                 | Arab/other | 3.90                       | 0.76 to 20.07    | 7.04                     | * 1.27 to 38.91   |
| Time trend (monthly)            |            | 1.00                       | 0.99 to 1.02     | 1.00                     | 0.99 to 1.02      |
| Past year smoker                | No         |                            |                  | Reference                |                   |
|                                 | Yes        |                            |                  | 1.20                     | 0.88 to 1.64      |
| Motivation to cut down drinking | None       |                            |                  | Reference                |                   |
|                                 | Moderate   |                            |                  | 2.64                     | *** 1.91 to 3.65  |
|                                 | High       |                            |                  | 4.54                     | *** 2.96 to 6.96  |
| AUDIT Score                     | 8-15       |                            |                  | Reference                |                   |
|                                 | 16-19      |                            |                  | 2.78                     | *** 1.79 to 4.33  |
|                                 | 20+        |                            |                  | 11.88                    | *** 8.18 to 17.26 |
| Constant                        |            | 0.04                       | *** 0.01 to 0.22 | 0.01                     | *** 0 to 0.06     |

Key: \* p<0.05, \*\* p<0.01, \*\*\*, p<0.001

**Table S6 - Unweighted logistic regression results for factors associated with likelihood of receiving Brief Intervention for risky alcohol use: socioeconomic-adjusted models 1 & 2**

|                                 |            | Socioeconomic-adjusted models 1 & 2 |                   |       |                  |
|---------------------------------|------------|-------------------------------------|-------------------|-------|------------------|
|                                 |            | OR                                  | 95% CI            | OR    | 95% CI           |
| Age                             | 18-24      | Reference                           |                   |       |                  |
|                                 | 25-34      | 1.59                                | 0.85 to 2.99      | 1.63  | 0.86 to 3.1      |
|                                 | 35-44      | 2.40                                | ** 1.33 to 4.33   | 2.54  | ** 1.39 to 4.64  |
|                                 | 45-54      | 3.22                                | *** 1.88 to 5.51  | 3.40  | *** 1.96 to 5.89 |
|                                 | 55-64      | 3.38                                | *** 1.93 to 5.92  | 3.43  | *** 1.93 to 6.09 |
|                                 | 65+        | 4.64                                | *** 2.61 to 8.23  | 4.51  | *** 2.49 to 8.16 |
| Gender                          | Male       | Reference                           |                   |       |                  |
|                                 | Female     | 0.66                                | * 0.47 to 0.91    | 0.68  | * 0.49 to 0.94   |
| Region                          | North      | Reference                           |                   |       |                  |
|                                 | Midlands   | 1.31                                | 0.91 to 1.9       | 1.29  | 0.9 to 1.87      |
|                                 | South      | 1.01                                | 0.73 to 1.41      | 0.99  | 0.71 to 1.38     |
| Children in the household       | None       | Reference                           |                   |       |                  |
|                                 | ≥1         | 0.96                                | 0.64 to 1.43      | 0.95  | 0.64 to 1.41     |
| Self-reported disability        | No         | Reference                           |                   |       |                  |
|                                 | Yes        | 1.67                                | ** 1.17 to 2.38   | 1.84  | ** 1.3 to 2.6    |
| Ethnicity                       | White      | Reference                           |                   |       |                  |
|                                 | Mixed race | 1.60                                | 0.5 to 5.08       | 1.57  | 0.49 to 4.99     |
|                                 | Asian      | 1.69                                | 0.5 to 5.73       | 1.80  | 0.52 to 6.22     |
|                                 | Black      | 0.52                                | 0.11 to 2.47      | 0.61  | 0.13 to 2.88     |
|                                 | Arab/other | 7.78                                | * 1.43 to 42.22   | 6.80  | * 1.21 to 38.21  |
| Time trend (monthly)            |            | 1.00                                | 0.99 to 1.02      | 1.00  | 0.99 to 1.02     |
| Past year smoker                | No         | Reference                           |                   |       |                  |
|                                 | Yes        | 1.08                                | 0.78 to 1.49      | 1.17  | 0.85 to 1.6      |
| Motivation to cut down drinking | None       | Reference                           |                   |       |                  |
|                                 | Moderate   | 2.74                                | *** 1.98 to 3.8   | 2.70  | *** 1.95 to 3.73 |
|                                 | High       | 4.66                                | *** 3.03 to 7.17  | 4.61  | *** 3 to 7.08    |
| AUDIT Score                     | 8-15       | Reference                           |                   |       |                  |
|                                 | 16-19      | 2.62                                | *** 1.68 to 4.09  | 2.70  | *** 1.74 to 4.21 |
|                                 | 20+        | 10.77                               | *** 7.38 to 15.73 | 11.69 | *** 8.04 to 17   |
| Social grade                    | AB         | Reference                           |                   |       |                  |
|                                 | C1         | 1.05                                | 0.71 to 1.55      |       |                  |
|                                 | C2         | 0.89                                | 0.56 to 1.42      |       |                  |
|                                 | D          | 1.32                                | 0.79 to 2.2       |       |                  |
|                                 | E          | 2.09                                | ** 1.28 to 3.41   |       |                  |
| Education                       | University | Reference                           |                   |       |                  |
|                                 | A-level    |                                     |                   | 1.09  | 0.7 to 1.69      |
|                                 | GCSE       |                                     |                   | 1.12  | 0.76 to 1.65     |
|                                 | Other      |                                     |                   | 1.32  | 0.76 to 2.3      |
|                                 | None       |                                     |                   | 1.36  | 0.84 to 2.2      |
| Constant                        |            | 0.01                                | *** 0 to 0.06     | 0.01  | *** 0 to 0.05    |

Key: \* p&lt;0.05, \*\* p&lt;0.01, \*\*\*, p&lt;0.001

8

**Table S7 - Unweighted logistic regression results for factors associated with likelihood of receiving Brief Intervention for risky alcohol use: socioeconomic-adjusted models 3 & 4**

|                                 |            | Socioeconomic-adjusted models 3 & 4 |               |           |               |
|---------------------------------|------------|-------------------------------------|---------------|-----------|---------------|
|                                 |            | OR                                  | 95% CI        | OR        | 95% CI        |
| Age                             | 18-24      | Reference                           |               |           |               |
|                                 | 25-34      | 1.83                                | 0.97 to 3.45  | 1.70      | 0.91 to 3.18  |
|                                 | 35-44      | 2.91 ***                            | 1.6 to 5.27   | 2.83 **   | 1.57 to 5.12  |
|                                 | 45-54      | 3.86 ***                            | 2.26 to 6.6   | 3.98 ***  | 2.33 to 6.82  |
|                                 | 55-64      | 3.53 ***                            | 2.03 to 6.13  | 4.30 ***  | 2.43 to 7.61  |
|                                 | 65+        | 4.19 ***                            | 2.37 to 7.4   | 5.94 ***  | 3.3 to 10.69  |
| Gender                          | Male       | Reference                           |               |           |               |
|                                 | Female     | 0.63 **                             | 0.45 to 0.88  | 0.67 *    | 0.48 to 0.93  |
| Region                          | North      | Reference                           |               |           |               |
|                                 | Midlands   | 1.32                                | 0.91 to 1.9   | 1.32      | 0.92 to 1.91  |
|                                 | South      | 0.95                                | 0.68 to 1.32  | 0.98      | 0.7 to 1.36   |
| Children in the household       | None       | Reference                           |               |           |               |
|                                 | ≥1         | 0.96                                | 0.64 to 1.43  | 0.96      | 0.65 to 1.44  |
| Self-reported disability        | No         | Reference                           |               |           |               |
|                                 | Yes        | 1.75 **                             | 1.24 to 2.47  | 1.72 **   | 1.22 to 2.44  |
| Ethnicity                       | White      | Reference                           |               |           |               |
|                                 | Mixed race | 1.58                                | 0.5 to 5.03   | 1.53      | 0.49 to 4.81  |
|                                 | Asian      | 1.84                                | 0.54 to 6.26  | 1.66      | 0.48 to 5.74  |
|                                 | Black      | 0.57                                | 0.12 to 2.73  | 0.57      | 0.12 to 2.7   |
|                                 | Arab/other | 6.66 *                              | 1.16 to 38.28 | 7.28 *    | 1.28 to 41.44 |
| Time trend (monthly)            |            | 1.00                                | 0.99 to 1.02  | 1.00      | 0.99 to 1.02  |
| Past year smoker                | No         | Reference                           |               |           |               |
|                                 | Yes        | 1.17                                | 0.85 to 1.6   | 1.05      | 0.76 to 1.45  |
| Motivation to cut down drinking | None       | Reference                           |               |           |               |
|                                 | Moderate   | 2.64 ***                            | 1.91 to 3.65  | 2.73 ***  | 1.97 to 3.78  |
|                                 | High       | 4.38 ***                            | 2.85 to 6.73  | 4.58 ***  | 2.99 to 7.02  |
| AUDIT Score                     | 8-15       | Reference                           |               |           |               |
|                                 | 16-19      | 2.73 ***                            | 1.76 to 4.25  | 2.72 ***  | 1.75 to 4.23  |
|                                 | 20+        | 11.43 ***                           | 7.86 to 16.64 | 11.32 *** | 7.78 to 16.48 |
| Employment status               | Full-time  | Reference                           |               |           |               |
|                                 | Other      | 1.62 **                             | 1.14 to 2.29  |           |               |
| Housing tenure                  | Owned      | Reference                           |               |           |               |
|                                 | Rented     |                                     |               | 1.65 **   | 1.18 to 2.3   |
| Constant                        |            | 0.01 ***                            | 0 to 0.05     | 0.01 ***  | 0 to 0.04     |

Key: \* p&lt;0.05, \*\* p&lt;0.01, \*\*\*, p&lt;0.001

**Figure S1 – Unweighted independent effects of four measures of socioeconomic status on Odds Ratio of receiving a Brief Intervention for smoking or risky drinking**

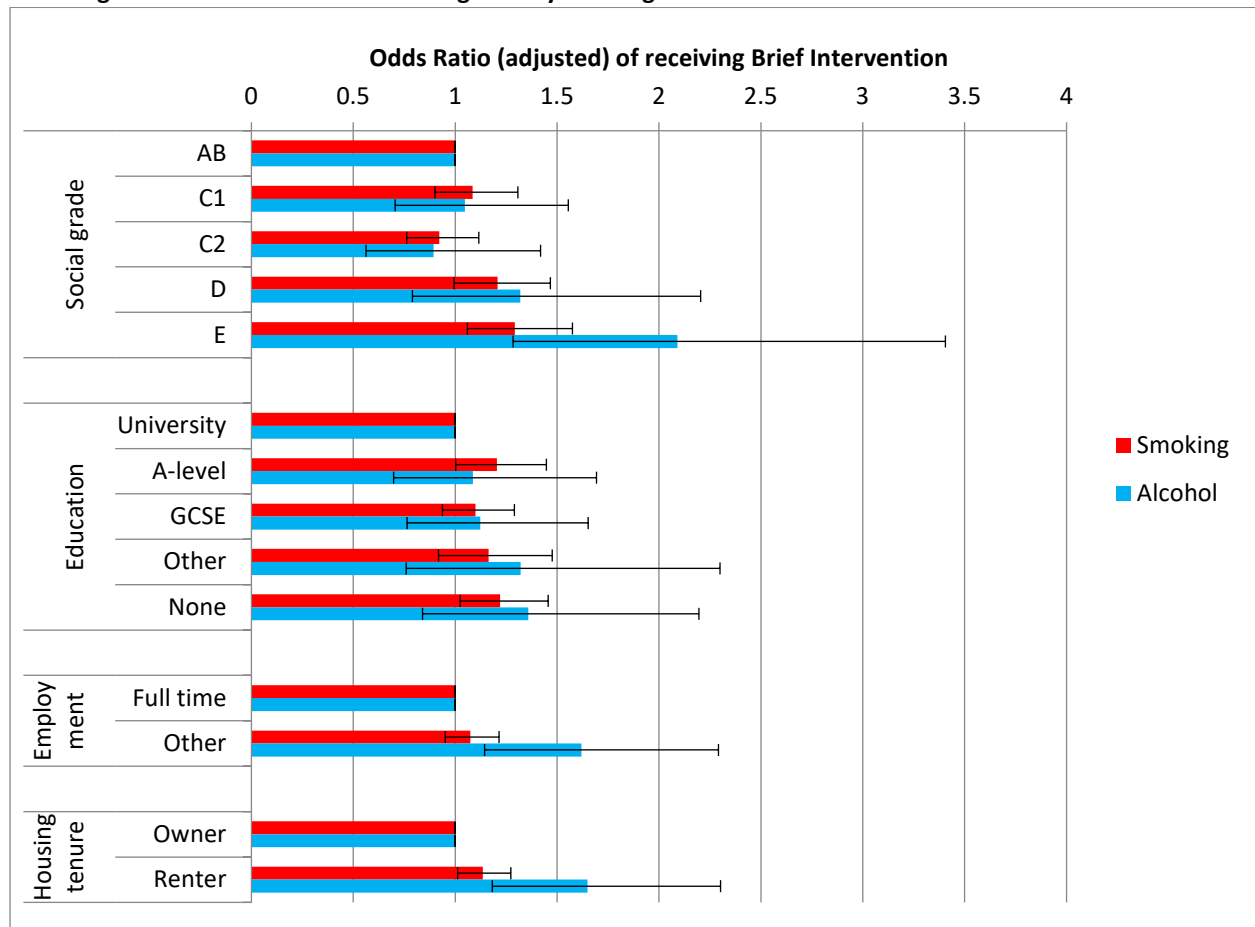

Peer review only

10

## Analysis using complete cases only

Table S8 - Logistic regression results for factors associated with likelihood of receiving Brief Intervention for smoking: demographic- and behaviour-adjusted models

|                                |            | Demographic-adjusted model |                  | Behaviour-adjusted model |                  |
|--------------------------------|------------|----------------------------|------------------|--------------------------|------------------|
|                                |            | OR                         | 95% CI           | OR                       | 95% CI           |
| Age                            | 18-24      | Reference                  |                  |                          |                  |
|                                | 25-34      | 1.37                       | ** 1.14 to 1.65  | 1.34                     | ** 1.1 to 1.63   |
|                                | 35-44      | 1.54                       | *** 1.27 to 1.87 | 1.53                     | *** 1.25 to 1.88 |
|                                | 45-54      | 2.00                       | *** 1.66 to 2.42 | 1.98                     | *** 1.63 to 2.42 |
|                                | 55-64      | 2.17                       | *** 1.78 to 2.64 | 2.19                     | *** 1.77 to 2.71 |
|                                | 65+        | 2.04                       | *** 1.67 to 2.49 | 2.13                     | *** 1.71 to 2.64 |
| Gender                         | Male       | Reference                  |                  |                          |                  |
|                                | Female     | 1.01                       | 0.91 to 1.13     | 0.97                     | 0.86 to 1.09     |
| Region                         | North      | Reference                  |                  |                          |                  |
|                                | Midlands   | 0.94                       | 0.82 to 1.07     | 0.93                     | 0.81 to 1.07     |
|                                | South      | 0.80                       | ** 0.7 to 0.91   | 0.78                     | *** 0.68 to 0.89 |
| Children in the household      | None       | Reference                  |                  |                          |                  |
|                                | ≥1         | 1.14                       | 1 to 1.31        | 1.08                     | 0.94 to 1.25     |
| Self-reported disability       | No         | Reference                  |                  |                          |                  |
|                                | Yes        | 1.39                       | *** 1.21 to 1.6  | 1.42                     | *** 1.23 to 1.64 |
| Ethnicity                      | White      | Reference                  |                  |                          |                  |
|                                | Mixed race | 0.93                       | 0.61 to 1.41     | 0.86                     | 0.55 to 1.34     |
|                                | Asian      | 0.88                       | 0.69 to 1.12     | 0.81                     | 0.63 to 1.05     |
|                                | Black      | 1.14                       | 0.79 to 1.64     | 0.94                     | 0.64 to 1.4      |
|                                | Arab/other | 0.97                       | 0.56 to 1.67     | 0.94                     | 0.52 to 1.71     |
| Time trend (monthly)           |            | 1.00                       | 0.99 to 1.01     | 1.00                     | 1 to 1.01        |
| Risky drinker (AUDIT 8+)       | No         |                            |                  | Reference                |                  |
|                                | Yes        |                            |                  | 0.86                     | * 0.74 to 0.99   |
| Motivation to cut down smoking | None       |                            |                  | Reference                |                  |
|                                | Moderate   |                            |                  | 1.40                     | *** 1.22 to 1.6  |
|                                | High       |                            |                  | 2.13                     | *** 1.77 to 2.55 |
| Constant                       |            | 0.45                       | * 0.21 to 0.93   | 0.33                     | ** 0.15 to 0.73  |

Key: \* p&lt;0.05, \*\* p&lt;0.01, \*\*\*, p&lt;0.001



11

**Table S9 - Logistic regression results for factors associated with likelihood of receiving Brief Intervention for smoking: socioeconomic-adjusted models 1 & 2**

|                                |            | Socioeconomic-adjusted models 1 & 2 |                  |      |                  |
|--------------------------------|------------|-------------------------------------|------------------|------|------------------|
|                                |            | OR                                  | 95% CI           | OR   | 95% CI           |
| Age                            | 18-24      | Reference                           |                  |      |                  |
|                                | 25-34      | 1.36                                | ** 1.12 to 1.66  | 1.37 | ** 1.12 to 1.66  |
|                                | 35-44      | 1.58                                | *** 1.29 to 1.94 | 1.58 | *** 1.28 to 1.94 |
|                                | 45-54      | 2.03                                | *** 1.66 to 2.48 | 2.04 | *** 1.67 to 2.5  |
|                                | 55-64      | 2.26                                | *** 1.83 to 2.79 | 2.22 | *** 1.79 to 2.75 |
|                                | 65+        | 2.21                                | *** 1.77 to 2.75 | 2.11 | *** 1.69 to 2.65 |
| Gender                         | Male       | Reference                           |                  |      |                  |
|                                | Female     | 0.95                                | 0.84 to 1.07     | 0.96 | 0.86 to 1.09     |
| Region                         | North      | Reference                           |                  |      |                  |
|                                | Midlands   | 0.94                                | 0.81 to 1.08     | 0.92 | 0.79 to 1.06     |
|                                | South      | 0.79                                | ** 0.69 to 0.91  | 0.78 | *** 0.68 to 0.89 |
| Children in the household      | None       | Reference                           |                  |      |                  |
|                                | ≥1         | 1.07                                | 0.93 to 1.23     | 1.08 | 0.93 to 1.24     |
| Self-reported disability       | No         | Reference                           |                  |      |                  |
|                                | Yes        | 1.35                                | *** 1.16 to 1.57 | 1.39 | *** 1.2 to 1.61  |
| Ethnicity                      | White      | Reference                           |                  |      |                  |
|                                | Mixed race | 0.84                                | 0.54 to 1.33     | 0.83 | 0.53 to 1.3      |
|                                | Asian      | 0.80                                | 0.62 to 1.03     | 0.83 | 0.64 to 1.08     |
|                                | Black      | 0.93                                | 0.62 to 1.37     | 0.97 | 0.65 to 1.44     |
|                                | Arab/other | 0.96                                | 0.53 to 1.74     | 0.92 | 0.51 to 1.68     |
| Time trend (monthly)           |            | 1.00                                | 1 to 1.01        | 1.00 | 1 to 1.01        |
| Risky drinker (AUDIT 8+)       | No         | Reference                           |                  |      |                  |
|                                | Yes        | 0.87                                | 0.76 to 1.01     | 0.87 | 0.75 to 1        |
| Motivation to cut down smoking | None       | Reference                           |                  |      |                  |
|                                | Moderate   | 1.42                                | *** 1.24 to 1.62 | 1.41 | *** 1.23 to 1.62 |
|                                | High       | 2.18                                | *** 1.81 to 2.62 | 2.14 | *** 1.78 to 2.58 |
| Social grade                   | AB         | Reference                           |                  |      |                  |
|                                | C1         | 1.09                                | 0.89 to 1.33     |      |                  |
|                                | C2         | 0.95                                | 0.77 to 1.17     |      |                  |
|                                | D          | 1.27                                | * 1.03 to 1.57   |      |                  |
|                                | E          | 1.32                                | * 1.06 to 1.63   |      |                  |
| Education                      | University | Reference                           |                  |      |                  |
|                                | A-level    |                                     |                  | 1.23 | * 1.01 to 1.51   |
|                                | GCSE       |                                     |                  | 1.14 | 0.96 to 1.36     |
|                                | Other      |                                     |                  | 1.19 | 0.92 to 1.55     |
|                                | None       |                                     |                  | 1.24 | * 1.02 to 1.5    |
| Constant                       |            | 0.31                                | ** 0.14 to 0.69  | 0.28 | ** 0.13 to 0.64  |

Key: \* p&lt;0.05, \*\* p&lt;0.01, \*\*\*, p&lt;0.001

12

**Table S10 - Logistic regression results for factors associated with likelihood of receiving Brief Intervention for smoking: socioeconomic-adjusted models 3 & 4**

|                                |            | Socioeconomic-adjusted models 3 & 4 |                  |      |                  |
|--------------------------------|------------|-------------------------------------|------------------|------|------------------|
|                                |            | OR                                  | 95% CI           | OR   | 95% CI           |
| Age                            | 18-24      | Reference                           |                  |      |                  |
|                                | 25-34      | 1.35                                | ** 1.11 to 1.65  | 1.35 | ** 1.11 to 1.64  |
|                                | 35-44      | 1.55                                | *** 1.26 to 1.9  | 1.59 | *** 1.3 to 1.96  |
|                                | 45-54      | 1.99                                | *** 1.63 to 2.43 | 2.03 | *** 1.66 to 2.49 |
|                                | 55-64      | 2.19                                | *** 1.78 to 2.71 | 2.24 | *** 1.8 to 2.79  |
|                                | 65+        | 2.10                                | *** 1.69 to 2.61 | 2.24 | *** 1.79 to 2.8  |
| Gender                         | Male       | Reference                           |                  |      |                  |
|                                | Female     | 0.96                                | 0.85 to 1.08     | 0.99 | 0.87 to 1.11     |
| Region                         | North      | Reference                           |                  |      |                  |
|                                | Midlands   | 0.93                                | 0.81 to 1.08     | 0.93 | 0.8 to 1.07      |
|                                | South      | 0.78                                | *** 0.68 to 0.89 | 0.77 | *** 0.67 to 0.88 |
| Children in the household      | None       | Reference                           |                  |      |                  |
|                                | ≥1         | 1.08                                | 0.94 to 1.25     | 1.07 | 0.92 to 1.23     |
| Self-reported disability       | No         | Reference                           |                  |      |                  |
|                                | Yes        | 1.40                                | *** 1.2 to 1.62  | 1.41 | *** 1.21 to 1.64 |
| Ethnicity                      | White      | Reference                           |                  |      |                  |
|                                | Mixed race | 0.86                                | 0.55 to 1.34     | 0.86 | 0.55 to 1.33     |
|                                | Asian      | 0.81                                | 0.63 to 1.05     | 0.86 | 0.66 to 1.12     |
|                                | Black      | 0.95                                | 0.64 to 1.4      | 0.95 | 0.63 to 1.44     |
|                                | Arab/other | 0.95                                | 0.52 to 1.72     | 0.94 | 0.52 to 1.7      |
| Time trend (monthly)           |            | 1.00                                | 1 to 1.01        | 1.00 | 1 to 1.01        |
| Risky drinker (AUDIT 8+)       | No         | Reference                           |                  |      |                  |
|                                | Yes        | 0.86                                | * 0.74 to 0.99   | 0.86 | * 0.75 to 1      |
| Motivation to cut down smoking | None       | Reference                           |                  |      |                  |
|                                | Moderate   | 1.40                                | *** 1.22 to 1.6  | 1.39 | *** 1.21 to 1.59 |
|                                | High       | 2.13                                | *** 1.77 to 2.56 | 2.08 | *** 1.73 to 2.49 |
| Employment status              | Full-time  | Reference                           |                  |      |                  |
|                                | Other      | 1.05                                | 0.92 to 1.2      |      |                  |
| Housing tenure                 | Owned      | Reference                           |                  |      |                  |
|                                | Rented     |                                     |                  | 1.10 | 0.97 to 1.24     |
| Constant                       |            | 0.33                                | ** 0.15 to 0.72  | 0.31 | ** 0.14 to 0.69  |

Key: \* p&lt;0.05, \*\* p&lt;0.01, \*\*\*, p&lt;0.001

13

**Table S11 - Logistic regression results for factors associated with likelihood of receiving Brief Intervention for risky alcohol use: demographic- and behaviour-adjusted models**

|                                 |            | Demographic-adjusted model |                  | Behaviour-adjusted model |                   |
|---------------------------------|------------|----------------------------|------------------|--------------------------|-------------------|
|                                 |            | OR                         | 95% CI           | OR                       | 95% CI            |
| Age                             | 18-24      | Reference                  |                  |                          |                   |
|                                 | 25-34      | 1.59                       | 0.84 to 3.01     | 1.45                     | 0.74 to 2.83      |
|                                 | 35-44      | 2.65                       | ** 1.45 to 4.82  | 2.28                     | * 1.2 to 4.31     |
|                                 | 45-54      | 2.82                       | *** 1.65 to 4.82 | 3.22                     | *** 1.83 to 5.65  |
|                                 | 55-64      | 2.37                       | ** 1.35 to 4.17  | 3.53                     | *** 1.93 to 6.48  |
|                                 | 65+        | 2.76                       | ** 1.55 to 4.92  | 5.45                     | *** 2.95 to 10.09 |
| Gender                          | Male       | Reference                  |                  |                          |                   |
|                                 | Female     | 0.65                       | * 0.47 to 0.9    | 0.62                     | ** 0.43 to 0.89   |
| Region                          | North      | Reference                  |                  |                          |                   |
|                                 | Midlands   | 1.23                       | 0.86 to 1.78     | 1.21                     | 0.81 to 1.8       |
|                                 | South      | 0.82                       | 0.6 to 1.14      | 0.77                     | 0.54 to 1.1       |
| Children in the household       | None       | Reference                  |                  |                          |                   |
|                                 | ≥1         | 0.79                       | 0.53 to 1.18     | 1.07                     | 0.7 to 1.65       |
| Self-reported disability        | No         | Reference                  |                  |                          |                   |
|                                 | Yes        | 3.52                       | *** 2.57 to 4.83 | 2.27                     | *** 1.57 to 3.28  |
| Ethnicity                       | White      | Reference                  |                  |                          |                   |
|                                 | Mixed race | 2.22                       | 0.74 to 6.63     | 2.19                     | 0.7 to 6.87       |
|                                 | Asian      | 1.06                       | 0.27 to 4.24     | 0.65                     | 0.13 to 3.33      |
|                                 | Black      | 0.32                       | 0.08 to 1.36     | 0.17                     | 0.02 to 1.16      |
|                                 | Arab/other | 4.61                       | 1 to 21.21       | 9.03                     | ** 1.87 to 43.55  |
| Time trend (monthly)            |            | 1.01                       | 0.99 to 1.02     | 1.01                     | 0.99 to 1.02      |
| Past year smoker                | No         |                            |                  | Reference                |                   |
|                                 | Yes        |                            |                  | 1.25                     | 0.9 to 1.73       |
| Motivation to cut down drinking | None       |                            |                  | Reference                |                   |
|                                 | Moderate   |                            |                  | 2.85                     | *** 1.99 to 4.08  |
|                                 | High       |                            |                  | 5.27                     | *** 3.32 to 8.36  |
| AUDIT Score                     | 8-15       |                            |                  | Reference                |                   |
|                                 | 16-19      |                            |                  | 2.94                     | *** 1.79 to 4.82  |
|                                 | 20+        |                            |                  | 11.76                    | *** 7.68 to 18.02 |
| Constant                        |            | 0.03                       | *** 0 to 0.21    | 0.01                     | *** 0 to 0.06     |

Key: \* p<0.05, \*\* p<0.01, \*\*\*, p<0.001

14

**Table S12 - Logistic regression results for factors associated with likelihood of receiving Brief Intervention for risky alcohol use: socioeconomic-adjusted models 1 & 2**

|                                 |            | Socioeconomic-adjusted models 1 & 2 |               |           |               |
|---------------------------------|------------|-------------------------------------|---------------|-----------|---------------|
|                                 |            | OR                                  | 95% CI        | OR        | 95% CI        |
| Age                             | 18-24      | Reference                           |               |           |               |
|                                 | 25-34      | 1.49                                | 0.76 to 2.91  | 1.49      | 0.76 to 2.89  |
|                                 | 35-44      | 2.25 *                              | 1.19 to 4.26  | 2.33 *    | 1.23 to 4.41  |
|                                 | 45-54      | 3.12 ***                            | 1.76 to 5.54  | 3.22 ***  | 1.79 to 5.79  |
|                                 | 55-64      | 3.50 ***                            | 1.91 to 6.43  | 3.35 ***  | 1.8 to 6.24   |
|                                 | 65+        | 5.47 ***                            | 2.96 to 10.13 | 5.23 ***  | 2.78 to 9.85  |
| Gender                          | Male       | Reference                           |               |           |               |
|                                 | Female     | 0.60 **                             | 0.42 to 0.87  | 0.63 *    | 0.44 to 0.9   |
| Region                          | North      | Reference                           |               |           |               |
|                                 | Midlands   | 1.22                                | 0.82 to 1.81  | 1.22      | 0.82 to 1.81  |
|                                 | South      | 0.80                                | 0.56 to 1.16  | 0.81      | 0.56 to 1.16  |
| Children in the household       | None       | Reference                           |               |           |               |
|                                 | ≥1         | 1.07                                | 0.69 to 1.66  | 1.07      | 0.7 to 1.64   |
| Self-reported disability        | No         | Reference                           |               |           |               |
|                                 | Yes        | 2.01 ***                            | 1.37 to 2.95  | 2.18 ***  | 1.49 to 3.18  |
| Ethnicity                       | White      | Reference                           |               |           |               |
|                                 | Mixed race | 2.28                                | 0.71 to 7.33  | 2.11      | 0.68 to 6.59  |
|                                 | Asian      | 0.64                                | 0.13 to 3.15  | 0.66      | 0.13 to 3.34  |
|                                 | Black      | 0.15 *                              | 0.02 to 0.98  | 0.17      | 0.02 to 1.22  |
|                                 | Arab/other | 9.81 **                             | 2.03 to 47.41 | 8.65 **   | 1.74 to 42.91 |
| Time trend (monthly)            |            | 1.00                                | 0.99 to 1.02  | 1.00      | 0.99 to 1.02  |
| Past year smoker                | No         | Reference                           |               |           |               |
|                                 | Yes        | 1.13                                | 0.81 to 1.58  | 1.22      | 0.88 to 1.71  |
| Motivation to cut down drinking | None       | Reference                           |               |           |               |
|                                 | Moderate   | 2.94 ***                            | 2.04 to 4.23  | 2.95 ***  | 2.04 to 4.26  |
|                                 | High       | 5.35 ***                            | 3.36 to 8.53  | 5.47 ***  | 3.42 to 8.73  |
| AUDIT Score                     | 8-15       | Reference                           |               |           |               |
|                                 | 16-19      | 2.78 ***                            | 1.67 to 4.64  | 2.76 ***  | 1.67 to 4.55  |
|                                 | 20+        | 10.91 ***                           | 7.1 to 16.78  | 11.20 *** | 7.32 to 17.13 |
| Social grade                    | AB         | Reference                           |               |           |               |
|                                 | C1         | 1.02                                | 0.66 to 1.58  |           |               |
|                                 | C2         | 0.88                                | 0.53 to 1.44  |           |               |
|                                 | D          | 1.29                                | 0.73 to 2.26  |           |               |
|                                 | E          | 2.03 **                             | 1.2 to 3.42   |           |               |
| Education                       | University |                                     |               | Reference |               |
|                                 | A-level    |                                     |               | 1.16      | 0.72 to 1.88  |
|                                 | GCSE       |                                     |               | 1.17      | 0.76 to 1.79  |
|                                 | Other      |                                     |               | 1.50      | 0.81 to 2.81  |
|                                 | None       |                                     |               | 1.52      | 0.9 to 2.58   |
| Constant                        |            | 0.01 ***                            | 0 to 0.06     | 0.01 ***  | 0 to 0.06     |

Key: \* p&lt;0.05, \*\* p&lt;0.01, \*\*\*, p&lt;0.001

**Table S13 - Logistic regression results for factors associated with likelihood of receiving Brief Intervention for risky alcohol use: socioeconomic-adjusted models 3 & 4**

|                                 |            | Socioeconomic-adjusted models 3 & 4 |                  |       |                   |
|---------------------------------|------------|-------------------------------------|------------------|-------|-------------------|
|                                 |            | OR                                  | 95% CI           | OR    | 95% CI            |
| Age                             | 18-24      | Reference                           |                  |       |                   |
|                                 | 25-34      | 1.60                                | 0.8 to 3.21      | 1.59  | 0.81 to 3.12      |
|                                 | 35-44      | 2.49                                | ** 1.29 to 4.82  | 2.69  | ** 1.4 to 5.15    |
|                                 | 45-54      | 3.48                                | *** 1.94 to 6.25 | 3.81  | *** 2.13 to 6.82  |
|                                 | 55-64      | 3.44                                | *** 1.88 to 6.3  | 4.18  | *** 2.19 to 7.97  |
|                                 | 65+        | 4.78                                | *** 2.6 to 8.8   | 6.78  | *** 3.54 to 13.01 |
| Gender                          | Male       | Reference                           |                  |       |                   |
|                                 | Female     | 0.58                                | ** 0.4 to 0.84   | 0.60  | ** 0.42 to 0.87   |
| Region                          | North      | Reference                           |                  |       |                   |
|                                 | Midlands   | 1.19                                | 0.8 to 1.78      | 1.23  | 0.82 to 1.83      |
|                                 | South      | 0.76                                | 0.53 to 1.08     | 0.77  | 0.53 to 1.1       |
| Children in the household       | None       | Reference                           |                  |       |                   |
|                                 | ≥1         | 1.09                                | 0.7 to 1.69      | 1.03  | 0.66 to 1.59      |
| Self-reported disability        | No         | Reference                           |                  |       |                   |
|                                 | Yes        | 2.10                                | *** 1.43 to 3.09 | 2.10  | *** 1.43 to 3.08  |
| Ethnicity                       | White      | Reference                           |                  |       |                   |
|                                 | Mixed race | 2.18                                | 0.73 to 6.52     | 2.15  | 0.72 to 6.41      |
|                                 | Asian      | 0.69                                | 0.14 to 3.5      | 0.62  | 0.12 to 3.24      |
|                                 | Black      | 0.15                                | 0.02 to 1.11     | 0.16  | 0.02 to 1.1       |
|                                 | Arab/other | 8.36                                | * 1.55 to 45.13  | 9.37  | ** 1.86 to 47.14  |
| Time trend (monthly)            |            | 1.00                                | 0.98 to 1.02     | 1.00  | 0.98 to 1.02      |
| Past year smoker                | No         | Reference                           |                  |       |                   |
|                                 | Yes        | 1.20                                | 0.86 to 1.67     | 1.08  | 0.77 to 1.51      |
| Motivation to cut down drinking | None       | Reference                           |                  |       |                   |
|                                 | Moderate   | 2.93                                | *** 2.04 to 4.22 | 2.88  | *** 2 to 4.14     |
|                                 | High       | 5.25                                | *** 3.3 to 8.37  | 5.28  | *** 3.31 to 8.4   |
| AUDIT Score                     | 8-15       | Reference                           |                  |       |                   |
|                                 | 16-19      | 2.88                                | *** 1.74 to 4.76 | 2.95  | *** 1.77 to 4.9   |
|                                 | 20+        | 11.09                               | *** 7.2 to 17.1  | 12.06 | *** 7.81 to 18.62 |
| Employment status               | Full-time  | Reference                           |                  |       |                   |
|                                 | Other      | 1.53                                | * 1.06 to 2.21   |       |                   |
| Housing tenure                  | Owned      | Reference                           |                  |       |                   |
|                                 | Rented     |                                     |                  | 1.49  | * 1.05 to 2.13    |
| Constant                        |            | 0.01                                | *** 0 to 0.06    | 0.01  | *** 0 to 0.06     |

Key: \* p&lt;0.05, \*\* p&lt;0.01, \*\*\*, p&lt;0.001

Figure S2 - Independent effects of four measures of socioeconomic status on Odds Ratio of receiving a Brief Intervention for smoking or risky drinking

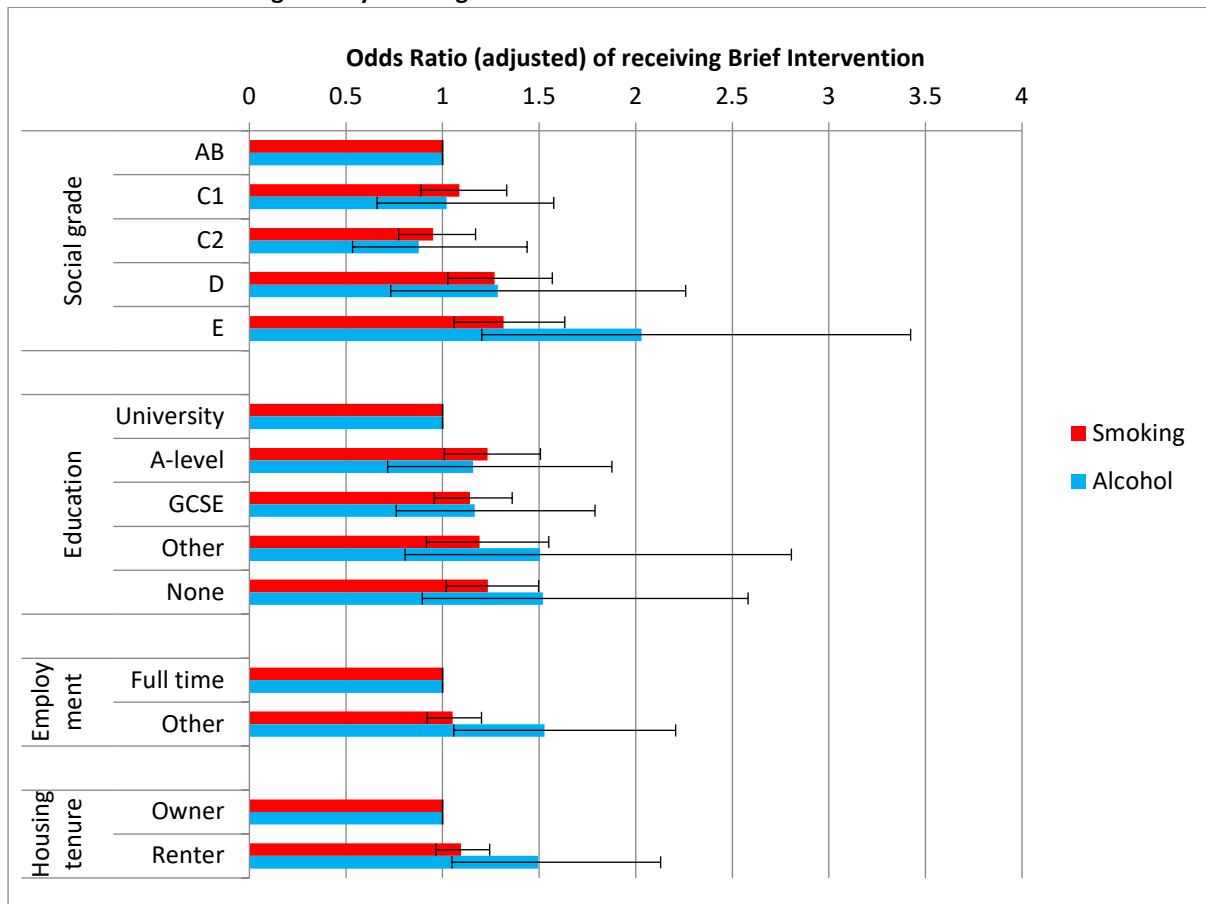

Descriptive statistics

Table S14 – Unweighted Ns underlying Table 2

|                |            | Past year smokers        |                         |                          | Risky drinkers           |                         |                          |
|----------------|------------|--------------------------|-------------------------|--------------------------|--------------------------|-------------------------|--------------------------|
|                |            | Prevalence in population | Visited GP in past year | Received BI   visited GP | Prevalence in population | Visited GP in past year | Received BI   visited GP |
| Population     |            | 10067                    | 6513                    | 3237                     | 6089                     | 3975                    | 258                      |
| Social grade   |            |                          |                         |                          |                          |                         |                          |
|                | AB         | 1186                     | 770                     | 365                      | 1437                     | 995                     | 73                       |
|                | C1         | 2639                     | 1698                    | 824                      | 2145                     | 1413                    | 90                       |
|                | C2         | 2337                     | 1431                    | 667                      | 1207                     | 747                     | 52                       |
|                | D          | 2060                     | 1314                    | 664                      | 715                      | 466                     | 38                       |
|                | E          | 1845                     | 1300                    | 717                      | 585                      | 354                     | 71                       |
| Education      |            |                          |                         |                          |                          |                         |                          |
|                | University | 1721                     | 1063                    | 485                      | 1707                     | 1142                    | 82                       |
|                | A-level    | 1866                     | 1157                    | 570                      | 1669                     | 980                     | 57                       |
|                | GCSE       | 3518                     | 2296                    | 1111                     | 1711                     | 1141                    | 100                      |
|                | Other      | 714                      | 474                     | 243                      | 424                      | 301                     | 31                       |
|                | None       | 2184                     | 1479                    | 799                      | 556                      | 393                     | 52                       |
| Employment     |            |                          |                         |                          |                          |                         |                          |
|                | Full time  | 3593                     | 2051                    | 962                      | 3511                     | 2414                    | 231                      |
|                | Other      | 6467                     | 4459                    | 2273                     | 2575                     | 1559                    | 91                       |
| Housing tenure |            |                          |                         |                          |                          |                         |                          |
|                | Owner      | 6043                     | 3889                    | 1952                     | 2621                     | 1600                    | 155                      |
|                | Renter     | 3861                     | 2537                    | 1246                     | 3377                     | 2322                    | 166                      |

18

## Main analysis – additional model results

### Behaviour-adjusted model results for smoking

**Table S15 – Logistic regression results for factors associated with likelihood of receiving Brief Intervention for smoking**

|                                |            | Behaviour-adjusted model |              |
|--------------------------------|------------|--------------------------|--------------|
|                                |            | OR                       | 95% CI       |
| Age                            | 18-24      |                          |              |
|                                | 25-34      | 1.36 **                  | 1.12 to 1.65 |
|                                | 35-44      | 1.56 ***                 | 1.28 to 1.91 |
|                                | 45-54      | 1.98 ***                 | 1.63 to 2.41 |
|                                | 55-64      | 2.23 ***                 | 1.81 to 2.75 |
|                                | 65+        | 2.14 ***                 | 1.73 to 2.65 |
| Gender                         | Male       |                          |              |
|                                | Female     | 0.97                     | 0.86 to 1.09 |
| Region                         | North      |                          |              |
|                                | Midlands   | 0.93                     | 0.81 to 1.07 |
|                                | South      | 0.78 ***                 | 0.68 to 0.89 |
| Children in the household      | None       |                          |              |
|                                | ≥1         | 1.08                     | 0.94 to 1.25 |
| Self-reported disability       | No         |                          |              |
|                                | Yes        | 1.40 ***                 | 1.21 to 1.62 |
| Ethnicity                      | White      |                          |              |
|                                | Mixed race | 0.87                     | 0.56 to 1.35 |
|                                | Asian      | 0.86                     | 0.67 to 1.11 |
|                                | Black      | 1.00                     | 0.68 to 1.49 |
|                                | Arab/other | 0.92                     | 0.51 to 1.66 |
| Time trend (monthly)           |            | 1.00                     | 1 to 1.01    |
| Risky drinker (AUDIT 8+)       | No         | Reference                |              |
|                                | Yes        | 0.84 *                   | 0.73 to 0.97 |
| Motivation to cut down smoking | None       | Reference                |              |
|                                | Moderate   | 1.42 ***                 | 1.25 to 1.63 |
|                                | High       | 2.14 ***                 | 1.79 to 2.57 |
| Constant                       |            | 0.37 *                   | 0.17 to 0.8  |



19

## Behaviour-adjusted model results for risky drinking

Table S16– Logistic regression results for factors associated with likelihood of receiving Brief Intervention for risky drinking

|                                 |            | Behaviour-adjusted model |           |               |
|---------------------------------|------------|--------------------------|-----------|---------------|
|                                 |            | OR                       |           | 95% CI        |
| Age                             | 18-24      |                          |           |               |
|                                 | 25-34      | 1.44                     |           | 0.76 to 2.75  |
|                                 | 35-44      | 2.11                     | *         | 1.12 to 3.96  |
|                                 | 45-54      | 3.00                     | ***       | 1.72 to 5.23  |
|                                 | 55-64      | 3.30                     | ***       | 1.8 to 6.03   |
|                                 | 65+        | 5.00                     | ***       | 2.71 to 9.23  |
| Gender                          | Male       |                          |           |               |
|                                 | Female     | 0.64                     | *         | 0.45 to 0.91  |
| Region                          | North      |                          |           |               |
|                                 | Midlands   | 1.18                     |           | 0.8 to 1.75   |
|                                 | South      | 0.80                     |           | 0.56 to 1.13  |
| Children in the household       | None       |                          |           |               |
|                                 | ≥1         | 1.06                     |           | 0.69 to 1.63  |
| Self-reported disability        | No         |                          |           |               |
|                                 | Yes        | 2.27                     | ***       | 1.57 to 3.27  |
| Ethnicity                       | White      |                          |           |               |
|                                 | Mixed race | 2.19                     |           | 0.7 to 6.86   |
|                                 | Asian      | 3.38                     |           | 0.68 to 16.88 |
|                                 | Black      | 0.19                     |           | 0.02 to 1.62  |
|                                 | Arab/other | 8.64                     | **        | 1.81 to 41.21 |
| Time trend (monthly)            |            | 1.00                     |           | 0.98 to 1.02  |
| Past year smoker                | No         |                          | Reference |               |
|                                 | Yes        | 1.20                     |           | 0.86 to 1.66  |
| Motivation to cut down drinking | None       |                          | Reference |               |
|                                 | Moderate   | 2.85                     | ***       | 2 to 4.05     |
|                                 | High       | 5.17                     | ***       | 3.29 to 8.14  |
| AUDIT Score                     | 8-15       |                          | Reference |               |
|                                 | 16-19      | 2.94                     | ***       | 1.81 to 4.79  |
|                                 | 20+        | 11.84                    | ***       | 7.77 to 18.04 |
| Constant                        |            | 0.01                     | ***       | 0 to 0.08     |

# Reporting checklist for cross sectional study.

Based on the STROBE cross sectional guidelines.

## Instructions to authors

Complete this checklist by entering the page numbers from your manuscript where readers will find each of the items listed below.

Your article may not currently address all the items on the checklist. Please modify your text to include the missing information. If you are certain that an item does not apply, please write "n/a" and provide a short explanation.

Upload your completed checklist as an extra file when you submit to a journal.

In your methods section, say that you used the STROBE cross sectional reporting guidelines, and cite them as:

von Elm E, Altman DG, Egger M, Pocock SJ, Gotsche PC, Vandembroucke JP. The Strengthening the Reporting of Observational Studies in Epidemiology (STROBE) Statement: guidelines for reporting observational studies.

|                        |     | Reporting Item                                                                                                                  | Page Number |
|------------------------|-----|---------------------------------------------------------------------------------------------------------------------------------|-------------|
| Title                  | #1a | Indicate the study's design with a commonly used term in the title or the abstract                                              | 1           |
| Abstract               | #1b | Provide in the abstract an informative and balanced summary of what was done and what was found                                 | 2           |
| Background / rationale | #2  | Explain the scientific background and rationale for the investigation being reported                                            | 3           |
| Objectives             | #3  | State specific objectives, including any prespecified hypotheses                                                                | 3           |
| Study design           | #4  | Present key elements of study design early in the paper                                                                         | 3           |
| Setting                | #5  | Describe the setting, locations, and relevant dates, including periods of recruitment, exposure, follow-up, and data collection | 3           |

|    |                            |      |                                                                                                                                                                                                                                                                                |     |
|----|----------------------------|------|--------------------------------------------------------------------------------------------------------------------------------------------------------------------------------------------------------------------------------------------------------------------------------|-----|
| 1  | Eligibility criteria       | #6a  | Give the eligibility criteria, and the sources and methods of selection of participants.                                                                                                                                                                                       | 3   |
| 2  |                            |      |                                                                                                                                                                                                                                                                                |     |
| 3  |                            |      |                                                                                                                                                                                                                                                                                |     |
| 4  |                            |      |                                                                                                                                                                                                                                                                                |     |
| 5  |                            | #7   | Clearly define all outcomes, exposures, predictors, potential confounders, and effect modifiers. Give diagnostic criteria, if applicable                                                                                                                                       | 3-4 |
| 6  |                            |      |                                                                                                                                                                                                                                                                                |     |
| 7  |                            |      |                                                                                                                                                                                                                                                                                |     |
| 8  |                            |      |                                                                                                                                                                                                                                                                                |     |
| 9  |                            |      |                                                                                                                                                                                                                                                                                |     |
| 10 | Data sources / measurement | #8   | For each variable of interest give sources of data and details of methods of assessment (measurement). Describe comparability of assessment methods if there is more than one group. Give information separately for for exposed and unexposed groups if applicable.           | 4   |
| 11 |                            |      |                                                                                                                                                                                                                                                                                |     |
| 12 |                            |      |                                                                                                                                                                                                                                                                                |     |
| 13 |                            |      |                                                                                                                                                                                                                                                                                |     |
| 14 |                            |      |                                                                                                                                                                                                                                                                                |     |
| 15 |                            |      |                                                                                                                                                                                                                                                                                |     |
| 16 |                            |      |                                                                                                                                                                                                                                                                                |     |
| 17 |                            |      |                                                                                                                                                                                                                                                                                |     |
| 18 | Bias                       | #9   | Describe any efforts to address potential sources of bias                                                                                                                                                                                                                      | 4   |
| 19 |                            |      |                                                                                                                                                                                                                                                                                |     |
| 20 |                            |      |                                                                                                                                                                                                                                                                                |     |
| 21 | Study size                 | #10  | Explain how the study size was arrived at                                                                                                                                                                                                                                      | 6   |
| 22 |                            |      |                                                                                                                                                                                                                                                                                |     |
| 23 | Quantitative variables     | #11  | Explain how quantitative variables were handled in the analyses. If applicable, describe which groupings were chosen, and why                                                                                                                                                  | 3-4 |
| 24 |                            |      |                                                                                                                                                                                                                                                                                |     |
| 25 |                            |      |                                                                                                                                                                                                                                                                                |     |
| 26 |                            |      |                                                                                                                                                                                                                                                                                |     |
| 27 |                            |      |                                                                                                                                                                                                                                                                                |     |
| 28 | Statistical methods        | #12a | Describe all statistical methods, including those used to control for confounding                                                                                                                                                                                              | 4-5 |
| 29 |                            |      |                                                                                                                                                                                                                                                                                |     |
| 30 |                            |      |                                                                                                                                                                                                                                                                                |     |
| 31 |                            |      |                                                                                                                                                                                                                                                                                |     |
| 32 |                            |      |                                                                                                                                                                                                                                                                                |     |
| 33 |                            | #12b | Describe any methods used to examine subgroups and interactions                                                                                                                                                                                                                | n/a |
| 34 |                            |      |                                                                                                                                                                                                                                                                                |     |
| 35 |                            |      |                                                                                                                                                                                                                                                                                |     |
| 36 |                            | #12c | Explain how missing data were addressed                                                                                                                                                                                                                                        | 4   |
| 37 |                            |      |                                                                                                                                                                                                                                                                                |     |
| 38 |                            | #12d | If applicable, describe analytical methods taking account of sampling strategy                                                                                                                                                                                                 | 4   |
| 39 |                            |      |                                                                                                                                                                                                                                                                                |     |
| 40 |                            |      |                                                                                                                                                                                                                                                                                |     |
| 41 |                            |      |                                                                                                                                                                                                                                                                                |     |
| 42 |                            | #12e | Describe any sensitivity analyses                                                                                                                                                                                                                                              | 4   |
| 43 |                            |      |                                                                                                                                                                                                                                                                                |     |
| 44 | Participants               | #13a | Report numbers of individuals at each stage of study—eg numbers potentially eligible, examined for eligibility, confirmed eligible, included in the study, completing follow-up, and analysed. Give information separately for for exposed and unexposed groups if applicable. | 6   |
| 45 |                            |      |                                                                                                                                                                                                                                                                                |     |
| 46 |                            |      |                                                                                                                                                                                                                                                                                |     |
| 47 |                            | #13b | Give reasons for non-participation at each stage                                                                                                                                                                                                                               | n/a |
| 48 |                            |      |                                                                                                                                                                                                                                                                                |     |
| 49 |                            | #13c | Consider use of a flow diagram                                                                                                                                                                                                                                                 | n/a |
| 50 |                            |      |                                                                                                                                                                                                                                                                                |     |
| 51 |                            |      |                                                                                                                                                                                                                                                                                |     |
| 52 |                            |      |                                                                                                                                                                                                                                                                                |     |
| 53 |                            |      |                                                                                                                                                                                                                                                                                |     |
| 54 |                            |      |                                                                                                                                                                                                                                                                                |     |
| 55 |                            |      |                                                                                                                                                                                                                                                                                |     |
| 56 |                            |      |                                                                                                                                                                                                                                                                                |     |
| 57 |                            |      |                                                                                                                                                                                                                                                                                |     |
| 58 |                            |      |                                                                                                                                                                                                                                                                                |     |
| 59 |                            |      |                                                                                                                                                                                                                                                                                |     |
| 60 |                            |      |                                                                                                                                                                                                                                                                                |     |

|    |                  |      |                                                                                                                                                                                                                   |          |
|----|------------------|------|-------------------------------------------------------------------------------------------------------------------------------------------------------------------------------------------------------------------|----------|
| 1  | Descriptive data | #14a | Give characteristics of study participants (eg demographic, clinical, social) and information on exposures and potential confounders. Give information separately for exposed and unexposed groups if applicable. | 6        |
| 2  |                  |      |                                                                                                                                                                                                                   |          |
| 3  |                  |      |                                                                                                                                                                                                                   |          |
| 4  |                  |      |                                                                                                                                                                                                                   |          |
| 5  |                  |      |                                                                                                                                                                                                                   |          |
| 6  |                  |      |                                                                                                                                                                                                                   |          |
| 7  |                  |      |                                                                                                                                                                                                                   |          |
| 8  |                  | #14b | Indicate number of participants with missing data for each variable of interest                                                                                                                                   | 4        |
| 9  |                  |      |                                                                                                                                                                                                                   |          |
| 10 |                  |      |                                                                                                                                                                                                                   |          |
| 11 | Outcome data     | #15  | Report numbers of outcome events or summary measures. Give information separately for exposed and unexposed groups if applicable.                                                                                 | 6        |
| 12 |                  |      |                                                                                                                                                                                                                   |          |
| 13 |                  |      |                                                                                                                                                                                                                   |          |
| 14 |                  |      |                                                                                                                                                                                                                   |          |
| 15 |                  |      |                                                                                                                                                                                                                   |          |
| 16 |                  |      |                                                                                                                                                                                                                   |          |
| 17 | Main results     | #16a | Give unadjusted estimates and, if applicable, confounder-adjusted estimates and their precision (eg, 95% confidence interval). Make clear which confounders were adjusted for and why they were included          | 7, 9, 12 |
| 18 |                  |      |                                                                                                                                                                                                                   |          |
| 19 |                  |      |                                                                                                                                                                                                                   |          |
| 20 |                  |      |                                                                                                                                                                                                                   |          |
| 21 |                  |      |                                                                                                                                                                                                                   |          |
| 22 |                  |      |                                                                                                                                                                                                                   |          |
| 23 |                  |      |                                                                                                                                                                                                                   |          |
| 24 |                  | #16b | Report category boundaries when continuous variables were categorized                                                                                                                                             | 5        |
| 25 |                  |      |                                                                                                                                                                                                                   |          |
| 26 |                  |      |                                                                                                                                                                                                                   |          |
| 27 |                  |      |                                                                                                                                                                                                                   |          |
| 28 |                  | #16c | If relevant, consider translating estimates of relative risk into absolute risk for a meaningful time period                                                                                                      | n/a      |
| 29 |                  |      |                                                                                                                                                                                                                   |          |
| 30 |                  |      |                                                                                                                                                                                                                   |          |
| 31 | Other analyses   | #17  | Report other analyses done—e.g., analyses of subgroups and interactions, and sensitivity analyses                                                                                                                 | 14       |
| 32 |                  |      |                                                                                                                                                                                                                   |          |
| 33 |                  |      |                                                                                                                                                                                                                   |          |
| 34 |                  |      |                                                                                                                                                                                                                   |          |
| 35 | Key results      | #18  | Summarise key results with reference to study objectives                                                                                                                                                          | 14       |
| 36 |                  |      |                                                                                                                                                                                                                   |          |
| 37 | Limitations      | #19  | Discuss limitations of the study, taking into account sources of potential bias or imprecision. Discuss both direction and magnitude of any potential bias.                                                       | 14       |
| 38 |                  |      |                                                                                                                                                                                                                   |          |
| 39 |                  |      |                                                                                                                                                                                                                   |          |
| 40 |                  |      |                                                                                                                                                                                                                   |          |
| 41 |                  |      |                                                                                                                                                                                                                   |          |
| 42 |                  |      |                                                                                                                                                                                                                   |          |
| 43 | Interpretation   | #20  | Give a cautious overall interpretation considering objectives, limitations, multiplicity of analyses, results from similar studies, and other relevant evidence.                                                  | 14-15    |
| 44 |                  |      |                                                                                                                                                                                                                   |          |
| 45 |                  |      |                                                                                                                                                                                                                   |          |
| 46 |                  |      |                                                                                                                                                                                                                   |          |
| 47 |                  |      |                                                                                                                                                                                                                   |          |
| 48 | Generalisability | #21  | Discuss the generalisability (external validity) of the study results                                                                                                                                             | 14-15    |
| 49 |                  |      |                                                                                                                                                                                                                   |          |
| 50 |                  |      |                                                                                                                                                                                                                   |          |
| 51 |                  |      |                                                                                                                                                                                                                   |          |
| 52 | Funding          | #22  | Give the source of funding and the role of the funders for the present study and, if applicable, for the original study on which the present article is based                                                     | 15       |
| 53 |                  |      |                                                                                                                                                                                                                   |          |
| 54 |                  |      |                                                                                                                                                                                                                   |          |
| 55 |                  |      |                                                                                                                                                                                                                   |          |
| 56 |                  |      |                                                                                                                                                                                                                   |          |
| 57 |                  |      |                                                                                                                                                                                                                   |          |
| 58 |                  |      |                                                                                                                                                                                                                   |          |
| 59 |                  |      |                                                                                                                                                                                                                   |          |
| 60 |                  |      |                                                                                                                                                                                                                   |          |

1 The STROBE checklist is distributed under the terms of the Creative Commons Attribution License  
2 CC-BY. This checklist was completed on 06. April 2018 using <http://www.goodreports.org/>, a tool  
3 made by the [EQUATOR Network](#) in collaboration with [Penelope.ai](#)  
4  
5  
6  
7  
8  
9  
10  
11  
12  
13  
14  
15  
16  
17  
18  
19  
20  
21  
22  
23  
24  
25  
26  
27  
28  
29  
30  
31  
32  
33  
34  
35  
36  
37  
38  
39  
40  
41  
42  
43  
44  
45  
46  
47  
48  
49  
50  
51  
52  
53  
54  
55  
56  
57  
58  
59  
60

For peer review only
