# Supplementary material for: Socioeconomic inequalities in the delivery of brief interventions for smoking and excessive drinking: findings from a cross-sectional household survey in England
Source: PubMed Central journal article supplement — BMJ Open. 2019 May 1;9(4):e023448. doi: 10.1136/bmjopen-2018-023448 (PMC6501949; doi:10.1136/bmjopen-2018-023448), 2019-05-01
Supplement: bmjopen-2018-023448supp001.pdf [file bmjopen-2018-023448supp001.pdf]

## **The association between socioeconomic status and receipt of Brief Interventions for smoking and drinking: analysis of a population-based household survey: Supplementary material**

### **Smoker definition**

'Past-year smokers' were defined as those who responded to the question 'Do you smoke or have you ever smoked' with 'I smoke cigarettes (including hand-rolled) every day', 'I smoke cigarettes (including hand-rolled), but not every day', 'I do not smoke cigarettes at all, but I do smoke tobacco of some kind (e.g. pipe, cigar or shisha)' or 'I have stopped smoking completely in the last year'. E-cigarettes were specifically excluded from the definition of cigarettes in the question. Recent quitters were included in the sample to capture individuals who may have given up following a BI received in primary care.

### **Outcome measures**

Among smokers, BI receipt was assessed by asking 'Has your GP spoken to you about smoking in the past year (i.e. last 12 months)?' Respondents were encouraged to select all options that applied and were classified into those who received a BI (those selecting at least one of four options: i) 'Yes, he/she advised me to stop but did not offer anything'; ii) 'Yes, he/she suggested that I go to a specialist stop smoking advisor or group'; iii) 'Yes, he/she suggested that I see a nurse in the practice'; iv) 'Yes, he/she offered me a prescription for Champix/Zyban, a nicotine patch, nicotine gum or other nicotine product') and those who did not (i.e. those who did not select any of options i) to iv) but did select one of 'No, I have seen my GP in the last year but he/she has not spoken to me about smoking' or 'Yes, he/she asked me about my smoking but did not advise me to stop smoking').

Among risky drinkers, BI receipt was assessed by asking 'In the last 12 months, has a doctor or other health worker within your GP surgery discussed your drinking?' Respondents were encouraged to select all options that applied and were classified into those who received a BI (those selecting at least one of three options: i) 'Yes, a doctor or other health worker within my GP surgery offered advice about cutting down my drinking'; ii) 'Yes, a doctor or other health worker within my GP surgery offered help or support within the surgery to help me cut down'; iii) 'Yes, a doctor or other health worker within my GP surgery referred me to an alcohol service or advised me to seek specialist help') and those who did not (i.e. those who did not select any of options i) to iii) but did select one of 'No, I have seen a doctor or health worker within my GP surgery but did not discuss my drinking' or 'Yes, a doctor or other health worker within my GP surgery asked about my drinking').

## Analysis using unweighted data

Table S1 - Descriptive analysis of prevalence, GP attendance and BI delivery rates for smokers and risky drinkers by socioeconomic status (unweighted, 95% Confidence Intervals in brackets)

|                | Past year smokers        |                         |                          | Risky drinkers           |                         |                          |
|----------------|--------------------------|-------------------------|--------------------------|--------------------------|-------------------------|--------------------------|
|                | Prevalence in population | Visited GP in past year | Received BI   visited GP | Prevalence in population | Visited GP in past year | Received BI   visited GP |
| Population     | 20.6% (20.3 to 21)       | 64.8% (63.9 to 65.7)    | 49.7% (48.5 to 50.9)     | 12.6% (12.3 to 12.7)     | 65.4% (64.2 to 66)      | 6.5% (5.7 to 6.9)        |
|                |                          |                         |                          |                          |                         |                          |
| Social grade   |                          |                         |                          |                          |                         |                          |
| AB             | 11.2% (10.6 to 11.8)     | 65.1% (62.4 to 67.9)    | 47.5% (43.9 to 51)       | 13.6% (12.9 to 13.9)     | 69.4% (67 to 70.7)      | 5.6% (4.2 to 6.4)        |
| C1             | 17.5% (16.9 to 18.1)     | 64.4% (62.6 to 66.3)    | 48.6% (46.2 to 51)       | 14.3% (13.8 to 14.6)     | 66% (64 to 67)          | 5% (3.9 to 5.6)          |
| C2             | 23.4% (22.5 to 24.2)     | 61.3% (59.3 to 63.3)    | 46.6% (44.1 to 49.2)     | 12.2% (11.5 to 12.5)     | 61.9% (59.2 to 63.3)    | 5.2% (3.6 to 6.1)        |
| D              | 26.8% (25.8 to 27.8)     | 63.9% (61.8 to 66)      | 50.5% (47.8 to 53.2)     | 9.3% (8.7 to 9.7)        | 65.3% (61.8 to 67)      | 6.9% (4.6 to 8)          |
| E              | 34.3% (33 to 35.5)       | 70.5% (68.5 to 72.6)    | 55.2% (52.4 to 57.9)     | 10.9% (10.1 to 11.4)     | 60.5% (56.5 to 62.5)    | 17% (13.1 to 19.1)       |
|                |                          |                         |                          |                          |                         |                          |
| Education      |                          |                         |                          |                          |                         |                          |
| University     | 12.7% (12.2 to 13.3)     | 61.9% (59.6 to 64.2)    | 45.8% (42.8 to 48.8)     | 12.7% (12.1 to 13)       | 67.1% (64.9 to 68.2)    | 5.5% (4.2 to 6.2)        |
| A-level        | 20.8% (20 to 21.6)       | 62.1% (59.9 to 64.3)    | 49.3% (46.4 to 52.1)     | 18.7% (17.9 to 19.1)     | 58.8% (56.4 to 60)      | 4.8% (3.5 to 5.5)        |
| GCSE           | 25.7% (25 to 26.4)       | 65.4% (63.8 to 66.9)    | 48.4% (46.4 to 50.5)     | 12.6% (12 to 12.9)       | 66.8% (64.5 to 67.9)    | 7% (5.5 to 7.8)          |
| Other          | 18.2% (17 to 19.5)       | 66.5% (63 to 69.9)      | 51.3% (46.8 to 55.8)     | 10.9% (9.9 to 11.4)      | 71.2% (66.8 to 73.4)    | 7.6% (4.6 to 9.2)        |
| None           | 25.9% (25 to 26.9)       | 67.8% (65.9 to 69.8)    | 54% (51.5 to 56.6)       | 6.7% (6.1 to 6.9)        | 70.7% (66.9 to 72.6)    | 11% (7.9 to 12.5)        |
|                |                          |                         |                          |                          |                         |                          |
| Employment     |                          |                         |                          |                          |                         |                          |
| Full time      | 22.1% (21.4 to 22.7)     | 57.2% (55.5 to 58.8)    | 46.9% (44.8 to 49.1)     | 15.9% (15.3 to 16.2)     | 60.7% (58.8 to 61.6)    | 4.3% (3.3 to 4.8)        |
| Other          | 19.9% (19.5 to 20.4)     | 69.1% (67.9 to 70.2)    | 51% (49.5 to 52.5)       | 10.9% (10.5 to 11.1)     | 68.8% (67.3 to 69.6)    | 7.8% (6.8 to 8.4)        |
|                |                          |                         |                          |                          |                         |                          |
| Housing tenure |                          |                         |                          |                          |                         |                          |
| Owner          | 13.2% (12.8 to 13.6)     | 65.8% (64.3 to 67.3)    | 49.2% (47.2 to 51.1)     | 11.6% (11.2 to 11.8)     | 68.9% (67.3 to 69.7)    | 5.4% (4.5 to 5.9)        |
| Renter         | 32.5% (31.8 to 33.2)     | 64.5% (63.3 to 65.7)    | 50.2% (48.6 to 51.8)     | 14.2% (13.7 to 14.5)     | 61.1% (59.3 to 62.1)    | 8.1% (6.7 to 8.8)        |

**Table S2 – Unweighted logistic regression results for factors associated with likelihood of receiving Brief Intervention for smoking: demographic- and behaviour-adjusted models**

|                                |            | Demographic-adjusted model |                  | Behaviour-adjusted model |                  |
|--------------------------------|------------|----------------------------|------------------|--------------------------|------------------|
|                                |            | OR                         | 95% CI           | OR                       | 95% CI           |
| Age                            | 18-24      | Reference                  |                  |                          |                  |
|                                | 25-34      | 1.36                       | *** 1.14 to 1.61 | 1.32                     | ** 1.1 to 1.59   |
|                                | 35-44      | 1.59                       | *** 1.33 to 1.9  | 1.60                     | *** 1.33 to 1.93 |
|                                | 45-54      | 2.02                       | *** 1.7 to 2.41  | 2.01                     | *** 1.67 to 2.42 |
|                                | 55-64      | 2.25                       | *** 1.88 to 2.7  | 2.31                     | *** 1.9 to 2.8   |
|                                | 65+        | 2.06                       | *** 1.71 to 2.48 | 2.16                     | *** 1.77 to 2.63 |
| Gender                         | Male       | Reference                  |                  |                          |                  |
|                                | Female     | 1.00                       | 0.91 to 1.11     | 0.98                     | 0.88 to 1.09     |
| Region                         | North      | Reference                  |                  |                          |                  |
|                                | Midlands   | 0.93                       | 0.82 to 1.06     | 0.92                     | 0.81 to 1.05     |
|                                | South      | 0.87                       | * 0.78 to 0.98   | 0.86                     | * 0.76 to 0.97   |
| Children in the household      | None       | Reference                  |                  |                          |                  |
|                                | ≥1         | 1.12                       | 0.99 to 1.26     | 1.07                     | 0.94 to 1.21     |
| Self-reported disability       | No         | Reference                  |                  |                          |                  |
|                                | Yes        | 1.43                       | *** 1.25 to 1.62 | 1.45                     | *** 1.26 to 1.66 |
| Ethnicity                      | White      | Reference                  |                  |                          |                  |
|                                | Mixed race | 0.83                       | 0.56 to 1.22     | 0.78                     | 0.52 to 1.17     |
|                                | Asian      | 0.94                       | 0.75 to 1.18     | 0.89                     | 0.7 to 1.12      |
|                                | Black      | 1.29                       | 0.92 to 1.81     | 1.12                     | 0.78 to 1.61     |
|                                | Arab/other | 1.04                       | 0.62 to 1.73     | 1.00                     | 0.57 to 1.76     |
| Time trend (monthly)           |            | 1.00                       | 0.99 to 1        | 1.00                     | 0.99 to 1.01     |
| Risky drinker (AUDIT 8+)       | No         |                            |                  | Reference                |                  |
|                                | Yes        |                            |                  | 0.89                     | 0.78 to 1.01     |
| Motivation to cut down smoking | None       |                            |                  | Reference                |                  |
|                                | Moderate   |                            |                  | 1.42                     | *** 1.25 to 1.6  |
|                                | High       |                            |                  | 2.21                     | *** 1.87 to 2.61 |
| Constant                       |            | 0.60                       | 0.31 to 1.19     | 0.46                     | * 0.23 to 0.95   |

Key: \* p<0.05, \*\* p<0.01, \*\*\*, p<0.001

**Table S3 - Unweighted logistic regression results for factors associated with likelihood of receiving Brief Intervention for smoking: socioeconomic adjusted models 1 & 2**

|                                |            | Socioeconomic-adjusted models 1 & 2 |                  |      |                  |
|--------------------------------|------------|-------------------------------------|------------------|------|------------------|
|                                |            | OR                                  | 95% CI           | OR   | 95% CI           |
| Age                            | 18-24      | Reference                           |                  |      |                  |
|                                | 25-34      | 1.35                                | ** 1.12 to 1.62  | 1.34 | ** 1.12 to 1.61  |
|                                | 35-44      | 1.64                                | *** 1.36 to 1.98 | 1.63 | *** 1.35 to 1.97 |
|                                | 45-54      | 2.05                                | *** 1.7 to 2.47  | 2.04 | *** 1.7 to 2.46  |
|                                | 55-64      | 2.36                                | *** 1.94 to 2.87 | 2.31 | *** 1.89 to 2.81 |
|                                | 65+        | 2.22                                | *** 1.82 to 2.72 | 2.13 | *** 1.73 to 2.62 |
| Gender                         | Male       | Reference                           |                  |      |                  |
|                                | Female     | 0.96                                | 0.86 to 1.08     | 0.98 | 0.88 to 1.09     |
| Region                         | North      | Reference                           |                  |      |                  |
|                                | Midlands   | 0.93                                | 0.82 to 1.06     | 0.92 | 0.81 to 1.05     |
|                                | South      | 0.87                                | * 0.77 to 0.99   | 0.86 | * 0.76 to 0.98   |
| Children in the household      | None       | Reference                           |                  |      |                  |
|                                | ≥1         | 1.05                                | 0.92 to 1.2      | 1.06 | 0.93 to 1.21     |
| Self-reported disability       | No         | Reference                           |                  |      |                  |
|                                | Yes        | 1.38                                | *** 1.2 to 1.58  | 1.42 | *** 1.24 to 1.63 |
| Ethnicity                      | White      | Reference                           |                  |      |                  |
|                                | Mixed race | 0.77                                | 0.51 to 1.16     | 0.79 | 0.52 to 1.19     |
|                                | Asian      | 0.86                                | 0.68 to 1.09     | 0.89 | 0.7 to 1.12      |
|                                | Black      | 1.10                                | 0.77 to 1.58     | 1.12 | 0.78 to 1.62     |
|                                | Arab/other | 1.01                                | 0.58 to 1.78     | 1.01 | 0.57 to 1.76     |
| Time trend (monthly)           |            | 1.00                                | 0.99 to 1.01     | 1.00 | 0.99 to 1.01     |
| Risky drinker (AUDIT 8+)       | No         | Reference                           |                  |      |                  |
|                                | Yes        | 0.90                                | 0.79 to 1.03     | 0.90 | 0.79 to 1.02     |
| Motivation to cut down smoking | None       | Reference                           |                  |      |                  |
|                                | Moderate   | 1.43                                | *** 1.26 to 1.62 | 1.43 | *** 1.26 to 1.61 |
|                                | High       | 2.25                                | *** 1.9 to 2.66  | 2.23 | *** 1.89 to 2.64 |
| Social grade                   | AB         | Reference                           |                  |      |                  |
|                                | C1         | 1.09                                | 0.9 to 1.31      |      |                  |
|                                | C2         | 0.92                                | 0.76 to 1.12     |      |                  |
|                                | D          | 1.21                                | 0.99 to 1.47     |      |                  |
|                                | E          | 1.29                                | * 1.06 to 1.58   |      |                  |
| Education                      | University | Reference                           |                  |      |                  |
|                                | A-level    |                                     |                  | 1.20 | * 1 to 1.45      |
|                                | GCSE       |                                     |                  | 1.10 | 0.94 to 1.29     |
|                                | Other      |                                     |                  | 1.16 | 0.92 to 1.48     |
|                                | None       |                                     |                  | 1.22 | * 1.02 to 1.46   |
| Constant                       |            | 0.44                                | * 0.21 to 0.92   | 0.41 | * 0.19 to 0.85   |

Key: \* p<0.05, \*\* p<0.01, \*\*\*, p<0.001

**Table S4 - Unweighted logistic regression results for factors associated with likelihood of receiving Brief Intervention for smoking: socioeconomic-adjusted models 3 & 4**

|                                |            | Socioeconomic-adjusted models 3 & 4 |                  |      |                  |
|--------------------------------|------------|-------------------------------------|------------------|------|------------------|
|                                |            | OR                                  | 95% CI           | OR   | 95% CI           |
| Age                            | 18-24      | Reference                           |                  |      |                  |
|                                | 25-34      | 1.34                                | ** 1.12 to 1.61  | 1.32 | ** 1.11 to 1.59  |
|                                | 35-44      | 1.62                                | *** 1.34 to 1.96 | 1.63 | *** 1.35 to 1.97 |
|                                | 45-54      | 2.03                                | *** 1.69 to 2.45 | 2.07 | *** 1.72 to 2.5  |
|                                | 55-64      | 2.31                                | *** 1.9 to 2.8   | 2.41 | *** 1.97 to 2.94 |
|                                | 65+        | 2.12                                | *** 1.73 to 2.59 | 2.27 | *** 1.85 to 2.78 |
| Gender                         | Male       | Reference                           |                  |      |                  |
|                                | Female     | 0.97                                | 0.87 to 1.08     | 0.98 | 0.87 to 1.09     |
| Region                         | North      | Reference                           |                  |      |                  |
|                                | Midlands   | 0.93                                | 0.81 to 1.06     | 0.93 | 0.81 to 1.06     |
|                                | South      | 0.86                                | * 0.76 to 0.97   | 0.85 | * 0.75 to 0.96   |
| Children in the household      | None       | Reference                           |                  |      |                  |
|                                | ≥1         | 1.06                                | 0.93 to 1.21     | 1.06 | 0.93 to 1.21     |
| Self-reported disability       | No         | Reference                           |                  |      |                  |
|                                | Yes        | 1.42                                | *** 1.24 to 1.63 | 1.41 | *** 1.22 to 1.62 |
| Ethnicity                      | White      | Reference                           |                  |      |                  |
|                                | Mixed race | 0.78                                | 0.52 to 1.17     | 0.77 | 0.51 to 1.16     |
|                                | Asian      | 0.88                                | 0.7 to 1.12      | 0.91 | 0.71 to 1.15     |
|                                | Black      | 1.12                                | 0.78 to 1.61     | 1.11 | 0.77 to 1.6      |
|                                | Arab/other | 1.01                                | 0.58 to 1.77     | 0.98 | 0.56 to 1.73     |
| Time trend (monthly)           |            | 1.00                                | 0.99 to 1.01     | 1.00 | 0.99 to 1.01     |
| Risky drinker (AUDIT 8+)       | No         | Reference                           |                  |      |                  |
|                                | Yes        | 0.89                                | 0.78 to 1.02     | 0.89 | 0.78 to 1.02     |
| Motivation to cut down smoking | None       | Reference                           |                  |      |                  |
|                                | Moderate   | 1.42                                | *** 1.26 to 1.61 | 1.43 | *** 1.26 to 1.61 |
|                                | High       | 2.22                                | *** 1.88 to 2.62 | 2.22 | *** 1.88 to 2.63 |
| Employment status              | Full-time  | Reference                           |                  |      |                  |
|                                | Other      | 1.07                                | 0.95 to 1.22     |      |                  |
| Housing tenure                 | Owned      | Reference                           |                  |      |                  |
|                                | Rented     |                                     |                  | 1.14 | * 1.01 to 1.27   |
| Constant                       |            | 0.45                                | * 0.22 to 0.92   | 0.43 | * 0.21 to 0.88   |

Key: \* p<0.05, \*\* p<0.01, \*\*\*, p<0.001

**Table S5 - Unweighted logistic regression results for factors associated with likelihood of receiving Brief Intervention for risky alcohol use: demographic- and behaviour-adjusted models**

|                                 |            | Demographic-adjusted model |                  | Behaviour-adjusted model |                   |
|---------------------------------|------------|----------------------------|------------------|--------------------------|-------------------|
|                                 |            | OR                         | 95% CI           | OR                       | 95% CI            |
| Age                             | 18-24      | Reference                  |                  |                          |                   |
|                                 | 25-34      | 1.77                       | 1 to 3.15        | 1.62                     | 0.87 to 3.03      |
|                                 | 35-44      | 2.92                       | *** 1.7 to 5     | 2.52                     | ** 1.41 to 4.53   |
|                                 | 45-54      | 3.22                       | *** 1.98 to 5.24 | 3.44                     | *** 2.03 to 5.82  |
|                                 | 55-64      | 2.41                       | ** 1.45 to 4.01  | 3.52                     | *** 2.03 to 6.13  |
|                                 | 65+        | 2.54                       | *** 1.52 to 4.25 | 4.72                     | *** 2.68 to 8.3   |
| Gender                          | Male       | Reference                  |                  |                          |                   |
|                                 | Female     | 0.72                       | * 0.53 to 0.96   | 0.67                     | * 0.48 to 0.93    |
| Region                          | North      | Reference                  |                  |                          |                   |
|                                 | Midlands   | 1.26                       | 0.9 to 1.75      | 1.30                     | 0.9 to 1.88       |
|                                 | South      | 1.01                       | 0.75 to 1.36     | 0.96                     | 0.69 to 1.34      |
| Children in the household       | None       | Reference                  |                  |                          |                   |
|                                 | ≥1         | 0.72                       | 0.5 to 1.04      | 0.95                     | 0.64 to 1.41      |
| Self-reported disability        | No         | Reference                  |                  |                          |                   |
|                                 | Yes        | 2.91                       | *** 2.16 to 3.91 | 1.91                     | *** 1.36 to 2.68  |
| Ethnicity                       | White      | Reference                  |                  |                          |                   |
|                                 | Mixed race | 1.45                       | 0.5 to 4.19      | 1.61                     | 0.51 to 5.09      |
|                                 | Asian      | 2.15                       | 0.73 to 6.28     | 1.76                     | 0.51 to 6.08      |
|                                 | Black      | 0.78                       | 0.18 to 3.33     | 0.61                     | 0.13 to 2.88      |
|                                 | Arab/other | 3.90                       | 0.76 to 20.07    | 7.04                     | * 1.27 to 38.91   |
| Time trend (monthly)            |            | 1.00                       | 0.99 to 1.02     | 1.00                     | 0.99 to 1.02      |
| Past year smoker                | No         |                            |                  | Reference                |                   |
|                                 | Yes        |                            |                  | 1.20                     | 0.88 to 1.64      |
| Motivation to cut down drinking | None       |                            |                  | Reference                |                   |
|                                 | Moderate   |                            |                  | 2.64                     | *** 1.91 to 3.65  |
|                                 | High       |                            |                  | 4.54                     | *** 2.96 to 6.96  |
| AUDIT Score                     | 8-15       |                            |                  | Reference                |                   |
|                                 | 16-19      |                            |                  | 2.78                     | *** 1.79 to 4.33  |
|                                 | 20+        |                            |                  | 11.88                    | *** 8.18 to 17.26 |
| Constant                        |            | 0.04                       | *** 0.01 to 0.22 | 0.01                     | *** 0 to 0.06     |

Key: \* p<0.05, \*\* p<0.01, \*\*\*, p<0.001

**Table S6 - Unweighted logistic regression results for factors associated with likelihood of receiving Brief Intervention for risky alcohol use: socioeconomic-adjusted models 1 & 2**

|                                 |            | Socioeconomic-adjusted models 1 & 2 |                   |           |                  |
|---------------------------------|------------|-------------------------------------|-------------------|-----------|------------------|
|                                 |            | OR                                  | 95% CI            | OR        | 95% CI           |
| Age                             | 18-24      | Reference                           |                   |           |                  |
|                                 | 25-34      | 1.59                                | 0.85 to 2.99      | 1.63      | 0.86 to 3.1      |
|                                 | 35-44      | 2.40                                | ** 1.33 to 4.33   | 2.54      | ** 1.39 to 4.64  |
|                                 | 45-54      | 3.22                                | *** 1.88 to 5.51  | 3.40      | *** 1.96 to 5.89 |
|                                 | 55-64      | 3.38                                | *** 1.93 to 5.92  | 3.43      | *** 1.93 to 6.09 |
|                                 | 65+        | 4.64                                | *** 2.61 to 8.23  | 4.51      | *** 2.49 to 8.16 |
| Gender                          | Male       | Reference                           |                   |           |                  |
|                                 | Female     | 0.66                                | * 0.47 to 0.91    | 0.68      | * 0.49 to 0.94   |
| Region                          | North      | Reference                           |                   |           |                  |
|                                 | Midlands   | 1.31                                | 0.91 to 1.9       | 1.29      | 0.9 to 1.87      |
|                                 | South      | 1.01                                | 0.73 to 1.41      | 0.99      | 0.71 to 1.38     |
| Children in the household       | None       | Reference                           |                   |           |                  |
|                                 | ≥1         | 0.96                                | 0.64 to 1.43      | 0.95      | 0.64 to 1.41     |
| Self-reported disability        | No         | Reference                           |                   |           |                  |
|                                 | Yes        | 1.67                                | ** 1.17 to 2.38   | 1.84      | ** 1.3 to 2.6    |
| Ethnicity                       | White      | Reference                           |                   |           |                  |
|                                 | Mixed race | 1.60                                | 0.5 to 5.08       | 1.57      | 0.49 to 4.99     |
|                                 | Asian      | 1.69                                | 0.5 to 5.73       | 1.80      | 0.52 to 6.22     |
|                                 | Black      | 0.52                                | 0.11 to 2.47      | 0.61      | 0.13 to 2.88     |
|                                 | Arab/other | 7.78                                | * 1.43 to 42.22   | 6.80      | * 1.21 to 38.21  |
| Time trend (monthly)            |            | 1.00                                | 0.99 to 1.02      | 1.00      | 0.99 to 1.02     |
| Past year smoker                | No         | Reference                           |                   |           |                  |
|                                 | Yes        | 1.08                                | 0.78 to 1.49      | 1.17      | 0.85 to 1.6      |
| Motivation to cut down drinking | None       | Reference                           |                   |           |                  |
|                                 | Moderate   | 2.74                                | *** 1.98 to 3.8   | 2.70      | *** 1.95 to 3.73 |
|                                 | High       | 4.66                                | *** 3.03 to 7.17  | 4.61      | *** 3 to 7.08    |
| AUDIT Score                     | 8-15       | Reference                           |                   |           |                  |
|                                 | 16-19      | 2.62                                | *** 1.68 to 4.09  | 2.70      | *** 1.74 to 4.21 |
|                                 | 20+        | 10.77                               | *** 7.38 to 15.73 | 11.69     | *** 8.04 to 17   |
| Social grade                    | AB         | Reference                           |                   |           |                  |
|                                 | C1         | 1.05                                | 0.71 to 1.55      |           |                  |
|                                 | C2         | 0.89                                | 0.56 to 1.42      |           |                  |
|                                 | D          | 1.32                                | 0.79 to 2.2       |           |                  |
|                                 | E          | 2.09                                | ** 1.28 to 3.41   |           |                  |
| Education                       | University |                                     |                   | Reference |                  |
|                                 | A-level    |                                     |                   | 1.09      | 0.7 to 1.69      |
|                                 | GCSE       |                                     |                   | 1.12      | 0.76 to 1.65     |
|                                 | Other      |                                     |                   | 1.32      | 0.76 to 2.3      |
|                                 | None       |                                     |                   | 1.36      | 0.84 to 2.2      |
| Constant                        |            | 0.01                                | *** 0 to 0.06     | 0.01      | *** 0 to 0.05    |

Key: \* p<0.05, \*\* p<0.01, \*\*\*, p<0.001

**Table S7 - Unweighted logistic regression results for factors associated with likelihood of receiving Brief Intervention for risky alcohol use: socioeconomic-adjusted models 3 & 4**

|                                 |            | Socioeconomic-adjusted models 3 & 4 |               |           |               |
|---------------------------------|------------|-------------------------------------|---------------|-----------|---------------|
|                                 |            | OR                                  | 95% CI        | OR        | 95% CI        |
| Age                             | 18-24      | Reference                           |               |           |               |
|                                 | 25-34      | 1.83                                | 0.97 to 3.45  | 1.70      | 0.91 to 3.18  |
|                                 | 35-44      | 2.91 ***                            | 1.6 to 5.27   | 2.83 **   | 1.57 to 5.12  |
|                                 | 45-54      | 3.86 ***                            | 2.26 to 6.6   | 3.98 ***  | 2.33 to 6.82  |
|                                 | 55-64      | 3.53 ***                            | 2.03 to 6.13  | 4.30 ***  | 2.43 to 7.61  |
|                                 | 65+        | 4.19 ***                            | 2.37 to 7.4   | 5.94 ***  | 3.3 to 10.69  |
| Gender                          | Male       | Reference                           |               |           |               |
|                                 | Female     | 0.63 **                             | 0.45 to 0.88  | 0.67 *    | 0.48 to 0.93  |
| Region                          | North      | Reference                           |               |           |               |
|                                 | Midlands   | 1.32                                | 0.91 to 1.9   | 1.32      | 0.92 to 1.91  |
|                                 | South      | 0.95                                | 0.68 to 1.32  | 0.98      | 0.7 to 1.36   |
| Children in the household       | None       | Reference                           |               |           |               |
|                                 | ≥1         | 0.96                                | 0.64 to 1.43  | 0.96      | 0.65 to 1.44  |
| Self-reported disability        | No         | Reference                           |               |           |               |
|                                 | Yes        | 1.75 **                             | 1.24 to 2.47  | 1.72 **   | 1.22 to 2.44  |
| Ethnicity                       | White      | Reference                           |               |           |               |
|                                 | Mixed race | 1.58                                | 0.5 to 5.03   | 1.53      | 0.49 to 4.81  |
|                                 | Asian      | 1.84                                | 0.54 to 6.26  | 1.66      | 0.48 to 5.74  |
|                                 | Black      | 0.57                                | 0.12 to 2.73  | 0.57      | 0.12 to 2.7   |
|                                 | Arab/other | 6.66 *                              | 1.16 to 38.28 | 7.28 *    | 1.28 to 41.44 |
| Time trend (monthly)            |            | 1.00                                | 0.99 to 1.02  | 1.00      | 0.99 to 1.02  |
| Past year smoker                | No         | Reference                           |               |           |               |
|                                 | Yes        | 1.17                                | 0.85 to 1.6   | 1.05      | 0.76 to 1.45  |
| Motivation to cut down drinking | None       | Reference                           |               |           |               |
|                                 | Moderate   | 2.64 ***                            | 1.91 to 3.65  | 2.73 ***  | 1.97 to 3.78  |
|                                 | High       | 4.38 ***                            | 2.85 to 6.73  | 4.58 ***  | 2.99 to 7.02  |
| AUDIT Score                     | 8-15       | Reference                           |               |           |               |
|                                 | 16-19      | 2.73 ***                            | 1.76 to 4.25  | 2.72 ***  | 1.75 to 4.23  |
|                                 | 20+        | 11.43 ***                           | 7.86 to 16.64 | 11.32 *** | 7.78 to 16.48 |
| Employment status               | Full-time  | Reference                           |               |           |               |
|                                 | Other      | 1.62 **                             | 1.14 to 2.29  |           |               |
| Housing tenure                  | Owned      | Reference                           |               |           |               |
|                                 | Rented     |                                     |               | 1.65 **   | 1.18 to 2.3   |
| Constant                        |            | 0.01 ***                            | 0 to 0.05     | 0.01 ***  | 0 to 0.04     |

Key: \* p<0.05, \*\* p<0.01, \*\*\*, p<0.001



**Figure S1 – Unweighted independent effects of four measures of socioeconomic status on Odds Ratio of receiving a Brief Intervention for smoking or risky drinking**

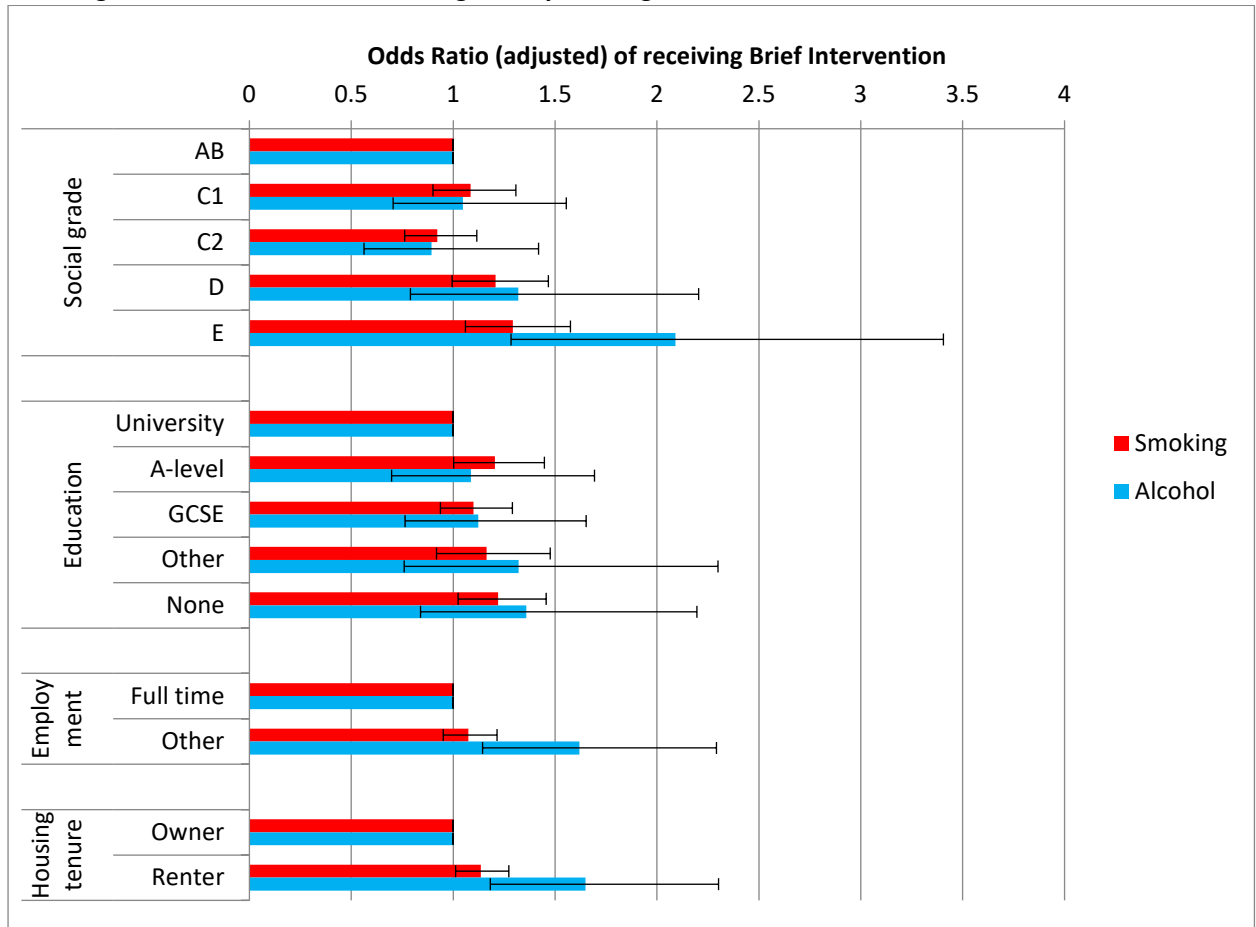

## Analysis using complete cases only

Table S8 - Logistic regression results for factors associated with likelihood of receiving Brief Intervention for smoking: demographic- and behaviour-adjusted models

|                                |            | Demographic-adjusted model |                  | Behaviour-adjusted model |                  |
|--------------------------------|------------|----------------------------|------------------|--------------------------|------------------|
|                                |            | OR                         | 95% CI           | OR                       | 95% CI           |
| Age                            | 18-24      | Reference                  |                  |                          |                  |
|                                | 25-34      | 1.37                       | ** 1.14 to 1.65  | 1.34                     | ** 1.1 to 1.63   |
|                                | 35-44      | 1.54                       | *** 1.27 to 1.87 | 1.53                     | *** 1.25 to 1.88 |
|                                | 45-54      | 2.00                       | *** 1.66 to 2.42 | 1.98                     | *** 1.63 to 2.42 |
|                                | 55-64      | 2.17                       | *** 1.78 to 2.64 | 2.19                     | *** 1.77 to 2.71 |
|                                | 65+        | 2.04                       | *** 1.67 to 2.49 | 2.13                     | *** 1.71 to 2.64 |
| Gender                         | Male       | Reference                  |                  |                          |                  |
|                                | Female     | 1.01                       | 0.91 to 1.13     | 0.97                     | 0.86 to 1.09     |
| Region                         | North      | Reference                  |                  |                          |                  |
|                                | Midlands   | 0.94                       | 0.82 to 1.07     | 0.93                     | 0.81 to 1.07     |
|                                | South      | 0.80                       | ** 0.7 to 0.91   | 0.78                     | *** 0.68 to 0.89 |
| Children in the household      | None       | Reference                  |                  |                          |                  |
|                                | ≥1         | 1.14                       | 1 to 1.31        | 1.08                     | 0.94 to 1.25     |
| Self-reported disability       | No         | Reference                  |                  |                          |                  |
|                                | Yes        | 1.39                       | *** 1.21 to 1.6  | 1.42                     | *** 1.23 to 1.64 |
| Ethnicity                      | White      | Reference                  |                  |                          |                  |
|                                | Mixed race | 0.93                       | 0.61 to 1.41     | 0.86                     | 0.55 to 1.34     |
|                                | Asian      | 0.88                       | 0.69 to 1.12     | 0.81                     | 0.63 to 1.05     |
|                                | Black      | 1.14                       | 0.79 to 1.64     | 0.94                     | 0.64 to 1.4      |
|                                | Arab/other | 0.97                       | 0.56 to 1.67     | 0.94                     | 0.52 to 1.71     |
| Time trend (monthly)           |            | 1.00                       | 0.99 to 1.01     | 1.00                     | 1 to 1.01        |
| Risky drinker (AUDIT 8+)       | No         |                            |                  | Reference                |                  |
|                                | Yes        |                            |                  | 0.86                     | * 0.74 to 0.99   |
| Motivation to cut down smoking | None       |                            |                  | Reference                |                  |
|                                | Moderate   |                            |                  | 1.40                     | *** 1.22 to 1.6  |
|                                | High       |                            |                  | 2.13                     | *** 1.77 to 2.55 |
| Constant                       |            | 0.45                       | * 0.21 to 0.93   | 0.33                     | ** 0.15 to 0.73  |

Key: \* p&lt;0.05, \*\* p&lt;0.01, \*\*\*, p&lt;0.001

**Table S9 - Logistic regression results for factors associated with likelihood of receiving Brief Intervention for smoking: socioeconomic-adjusted models 1 & 2**

|                                |            | Socioeconomic-adjusted models 1 & 2 |                  |      |                  |
|--------------------------------|------------|-------------------------------------|------------------|------|------------------|
|                                |            | OR                                  | 95% CI           | OR   | 95% CI           |
| Age                            | 18-24      | Reference                           |                  |      |                  |
|                                | 25-34      | 1.36                                | ** 1.12 to 1.66  | 1.37 | ** 1.12 to 1.66  |
|                                | 35-44      | 1.58                                | *** 1.29 to 1.94 | 1.58 | *** 1.28 to 1.94 |
|                                | 45-54      | 2.03                                | *** 1.66 to 2.48 | 2.04 | *** 1.67 to 2.5  |
|                                | 55-64      | 2.26                                | *** 1.83 to 2.79 | 2.22 | *** 1.79 to 2.75 |
|                                | 65+        | 2.21                                | *** 1.77 to 2.75 | 2.11 | *** 1.69 to 2.65 |
| Gender                         | Male       | Reference                           |                  |      |                  |
|                                | Female     | 0.95                                | 0.84 to 1.07     | 0.96 | 0.86 to 1.09     |
| Region                         | North      | Reference                           |                  |      |                  |
|                                | Midlands   | 0.94                                | 0.81 to 1.08     | 0.92 | 0.79 to 1.06     |
|                                | South      | 0.79                                | ** 0.69 to 0.91  | 0.78 | *** 0.68 to 0.89 |
| Children in the household      | None       | Reference                           |                  |      |                  |
|                                | ≥1         | 1.07                                | 0.93 to 1.23     | 1.08 | 0.93 to 1.24     |
| Self-reported disability       | No         | Reference                           |                  |      |                  |
|                                | Yes        | 1.35                                | *** 1.16 to 1.57 | 1.39 | *** 1.2 to 1.61  |
| Ethnicity                      | White      | Reference                           |                  |      |                  |
|                                | Mixed race | 0.84                                | 0.54 to 1.33     | 0.83 | 0.53 to 1.3      |
|                                | Asian      | 0.80                                | 0.62 to 1.03     | 0.83 | 0.64 to 1.08     |
|                                | Black      | 0.93                                | 0.62 to 1.37     | 0.97 | 0.65 to 1.44     |
|                                | Arab/other | 0.96                                | 0.53 to 1.74     | 0.92 | 0.51 to 1.68     |
| Time trend (monthly)           |            | 1.00                                | 1 to 1.01        | 1.00 | 1 to 1.01        |
| Risky drinker (AUDIT 8+)       | No         | Reference                           |                  |      |                  |
|                                | Yes        | 0.87                                | 0.76 to 1.01     | 0.87 | 0.75 to 1        |
| Motivation to cut down smoking | None       | Reference                           |                  |      |                  |
|                                | Moderate   | 1.42                                | *** 1.24 to 1.62 | 1.41 | *** 1.23 to 1.62 |
|                                | High       | 2.18                                | *** 1.81 to 2.62 | 2.14 | *** 1.78 to 2.58 |
| Social grade                   | AB         | Reference                           |                  |      |                  |
|                                | C1         | 1.09                                | 0.89 to 1.33     |      |                  |
|                                | C2         | 0.95                                | 0.77 to 1.17     |      |                  |
|                                | D          | 1.27                                | * 1.03 to 1.57   |      |                  |
|                                | E          | 1.32                                | * 1.06 to 1.63   |      |                  |
| Education                      | University | Reference                           |                  |      |                  |
|                                | A-level    |                                     |                  | 1.23 | * 1.01 to 1.51   |
|                                | GCSE       |                                     |                  | 1.14 | 0.96 to 1.36     |
|                                | Other      |                                     |                  | 1.19 | 0.92 to 1.55     |
|                                | None       |                                     |                  | 1.24 | * 1.02 to 1.5    |
| Constant                       |            | 0.31                                | ** 0.14 to 0.69  | 0.28 | ** 0.13 to 0.64  |

Key: \* p&lt;0.05, \*\* p&lt;0.01, \*\*\*, p&lt;0.001

**Table S10 - Logistic regression results for factors associated with likelihood of receiving Brief Intervention for smoking: socioeconomic-adjusted models 3 & 4**

|                                |            | Socioeconomic-adjusted models 3 & 4 |                  |      |                  |
|--------------------------------|------------|-------------------------------------|------------------|------|------------------|
|                                |            | OR                                  | 95% CI           | OR   | 95% CI           |
| Age                            | 18-24      | Reference                           |                  |      |                  |
|                                | 25-34      | 1.35                                | ** 1.11 to 1.65  | 1.35 | ** 1.11 to 1.64  |
|                                | 35-44      | 1.55                                | *** 1.26 to 1.9  | 1.59 | *** 1.3 to 1.96  |
|                                | 45-54      | 1.99                                | *** 1.63 to 2.43 | 2.03 | *** 1.66 to 2.49 |
|                                | 55-64      | 2.19                                | *** 1.78 to 2.71 | 2.24 | *** 1.8 to 2.79  |
|                                | 65+        | 2.10                                | *** 1.69 to 2.61 | 2.24 | *** 1.79 to 2.8  |
| Gender                         | Male       | Reference                           |                  |      |                  |
|                                | Female     | 0.96                                | 0.85 to 1.08     | 0.99 | 0.87 to 1.11     |
| Region                         | North      | Reference                           |                  |      |                  |
|                                | Midlands   | 0.93                                | 0.81 to 1.08     | 0.93 | 0.8 to 1.07      |
|                                | South      | 0.78                                | *** 0.68 to 0.89 | 0.77 | *** 0.67 to 0.88 |
| Children in the household      | None       | Reference                           |                  |      |                  |
|                                | ≥1         | 1.08                                | 0.94 to 1.25     | 1.07 | 0.92 to 1.23     |
| Self-reported disability       | No         | Reference                           |                  |      |                  |
|                                | Yes        | 1.40                                | *** 1.2 to 1.62  | 1.41 | *** 1.21 to 1.64 |
| Ethnicity                      | White      | Reference                           |                  |      |                  |
|                                | Mixed race | 0.86                                | 0.55 to 1.34     | 0.86 | 0.55 to 1.33     |
|                                | Asian      | 0.81                                | 0.63 to 1.05     | 0.86 | 0.66 to 1.12     |
|                                | Black      | 0.95                                | 0.64 to 1.4      | 0.95 | 0.63 to 1.44     |
|                                | Arab/other | 0.95                                | 0.52 to 1.72     | 0.94 | 0.52 to 1.7      |
| Time trend (monthly)           |            | 1.00                                | 1 to 1.01        | 1.00 | 1 to 1.01        |
| Risky drinker (AUDIT 8+)       | No         | Reference                           |                  |      |                  |
|                                | Yes        | 0.86                                | * 0.74 to 0.99   | 0.86 | * 0.75 to 1      |
| Motivation to cut down smoking | None       | Reference                           |                  |      |                  |
|                                | Moderate   | 1.40                                | *** 1.22 to 1.6  | 1.39 | *** 1.21 to 1.59 |
|                                | High       | 2.13                                | *** 1.77 to 2.56 | 2.08 | *** 1.73 to 2.49 |
| Employment status              | Full-time  | Reference                           |                  |      |                  |
|                                | Other      | 1.05                                | 0.92 to 1.2      |      |                  |
| Housing tenure                 | Owned      | Reference                           |                  |      |                  |
|                                | Rented     |                                     |                  | 1.10 | 0.97 to 1.24     |
| Constant                       |            | 0.33                                | ** 0.15 to 0.72  | 0.31 | ** 0.14 to 0.69  |

Key: \* p&lt;0.05, \*\* p&lt;0.01, \*\*\*, p&lt;0.001

**Table S11 - Logistic regression results for factors associated with likelihood of receiving Brief Intervention for risky alcohol use: demographic- and behaviour-adjusted models**

|                                 |            | Demographic-adjusted model |                  | Behaviour-adjusted model |                   |
|---------------------------------|------------|----------------------------|------------------|--------------------------|-------------------|
|                                 |            | OR                         | 95% CI           | OR                       | 95% CI            |
| Age                             | 18-24      | Reference                  |                  |                          |                   |
|                                 | 25-34      | 1.59                       | 0.84 to 3.01     | 1.45                     | 0.74 to 2.83      |
|                                 | 35-44      | 2.65                       | ** 1.45 to 4.82  | 2.28                     | * 1.2 to 4.31     |
|                                 | 45-54      | 2.82                       | *** 1.65 to 4.82 | 3.22                     | *** 1.83 to 5.65  |
|                                 | 55-64      | 2.37                       | ** 1.35 to 4.17  | 3.53                     | *** 1.93 to 6.48  |
|                                 | 65+        | 2.76                       | ** 1.55 to 4.92  | 5.45                     | *** 2.95 to 10.09 |
| Gender                          | Male       | Reference                  |                  |                          |                   |
|                                 | Female     | 0.65                       | * 0.47 to 0.9    | 0.62                     | ** 0.43 to 0.89   |
| Region                          | North      | Reference                  |                  |                          |                   |
|                                 | Midlands   | 1.23                       | 0.86 to 1.78     | 1.21                     | 0.81 to 1.8       |
|                                 | South      | 0.82                       | 0.6 to 1.14      | 0.77                     | 0.54 to 1.1       |
| Children in the household       | None       | Reference                  |                  |                          |                   |
|                                 | ≥1         | 0.79                       | 0.53 to 1.18     | 1.07                     | 0.7 to 1.65       |
| Self-reported disability        | No         | Reference                  |                  |                          |                   |
|                                 | Yes        | 3.52                       | *** 2.57 to 4.83 | 2.27                     | *** 1.57 to 3.28  |
| Ethnicity                       | White      | Reference                  |                  |                          |                   |
|                                 | Mixed race | 2.22                       | 0.74 to 6.63     | 2.19                     | 0.7 to 6.87       |
|                                 | Asian      | 1.06                       | 0.27 to 4.24     | 0.65                     | 0.13 to 3.33      |
|                                 | Black      | 0.32                       | 0.08 to 1.36     | 0.17                     | 0.02 to 1.16      |
|                                 | Arab/other | 4.61                       | 1 to 21.21       | 9.03                     | ** 1.87 to 43.55  |
| Time trend (monthly)            |            | 1.01                       | 0.99 to 1.02     | 1.01                     | 0.99 to 1.02      |
| Past year smoker                | No         |                            |                  | Reference                |                   |
|                                 | Yes        |                            |                  | 1.25                     | 0.9 to 1.73       |
| Motivation to cut down drinking | None       |                            |                  | Reference                |                   |
|                                 | Moderate   |                            |                  | 2.85                     | *** 1.99 to 4.08  |
|                                 | High       |                            |                  | 5.27                     | *** 3.32 to 8.36  |
| AUDIT Score                     | 8-15       |                            |                  | Reference                |                   |
|                                 | 16-19      |                            |                  | 2.94                     | *** 1.79 to 4.82  |
|                                 | 20+        |                            |                  | 11.76                    | *** 7.68 to 18.02 |
| Constant                        |            | 0.03                       | *** 0 to 0.21    | 0.01                     | *** 0 to 0.06     |

Key: \* p<0.05, \*\* p<0.01, \*\*\*, p<0.001

**Table S12 - Logistic regression results for factors associated with likelihood of receiving Brief Intervention for risky alcohol use: socioeconomic-adjusted models 1 & 2**

|                                 |            | Socioeconomic-adjusted models 1 & 2 |               |           |               |
|---------------------------------|------------|-------------------------------------|---------------|-----------|---------------|
|                                 |            | OR                                  | 95% CI        | OR        | 95% CI        |
| Age                             | 18-24      | Reference                           |               |           |               |
|                                 | 25-34      | 1.49                                | 0.76 to 2.91  | 1.49      | 0.76 to 2.89  |
|                                 | 35-44      | 2.25 *                              | 1.19 to 4.26  | 2.33 *    | 1.23 to 4.41  |
|                                 | 45-54      | 3.12 ***                            | 1.76 to 5.54  | 3.22 ***  | 1.79 to 5.79  |
|                                 | 55-64      | 3.50 ***                            | 1.91 to 6.43  | 3.35 ***  | 1.8 to 6.24   |
|                                 | 65+        | 5.47 ***                            | 2.96 to 10.13 | 5.23 ***  | 2.78 to 9.85  |
| Gender                          | Male       | Reference                           |               |           |               |
|                                 | Female     | 0.60 **                             | 0.42 to 0.87  | 0.63 *    | 0.44 to 0.9   |
| Region                          | North      | Reference                           |               |           |               |
|                                 | Midlands   | 1.22                                | 0.82 to 1.81  | 1.22      | 0.82 to 1.81  |
|                                 | South      | 0.80                                | 0.56 to 1.16  | 0.81      | 0.56 to 1.16  |
| Children in the household       | None       | Reference                           |               |           |               |
|                                 | ≥1         | 1.07                                | 0.69 to 1.66  | 1.07      | 0.7 to 1.64   |
| Self-reported disability        | No         | Reference                           |               |           |               |
|                                 | Yes        | 2.01 ***                            | 1.37 to 2.95  | 2.18 ***  | 1.49 to 3.18  |
| Ethnicity                       | White      | Reference                           |               |           |               |
|                                 | Mixed race | 2.28                                | 0.71 to 7.33  | 2.11      | 0.68 to 6.59  |
|                                 | Asian      | 0.64                                | 0.13 to 3.15  | 0.66      | 0.13 to 3.34  |
|                                 | Black      | 0.15 *                              | 0.02 to 0.98  | 0.17      | 0.02 to 1.22  |
|                                 | Arab/other | 9.81 **                             | 2.03 to 47.41 | 8.65 **   | 1.74 to 42.91 |
| Time trend (monthly)            |            | 1.00                                | 0.99 to 1.02  | 1.00      | 0.99 to 1.02  |
| Past year smoker                | No         | Reference                           |               |           |               |
|                                 | Yes        | 1.13                                | 0.81 to 1.58  | 1.22      | 0.88 to 1.71  |
| Motivation to cut down drinking | None       | Reference                           |               |           |               |
|                                 | Moderate   | 2.94 ***                            | 2.04 to 4.23  | 2.95 ***  | 2.04 to 4.26  |
|                                 | High       | 5.35 ***                            | 3.36 to 8.53  | 5.47 ***  | 3.42 to 8.73  |
| AUDIT Score                     | 8-15       | Reference                           |               |           |               |
|                                 | 16-19      | 2.78 ***                            | 1.67 to 4.64  | 2.76 ***  | 1.67 to 4.55  |
|                                 | 20+        | 10.91 ***                           | 7.1 to 16.78  | 11.20 *** | 7.32 to 17.13 |
| Social grade                    | AB         | Reference                           |               |           |               |
|                                 | C1         | 1.02                                | 0.66 to 1.58  |           |               |
|                                 | C2         | 0.88                                | 0.53 to 1.44  |           |               |
|                                 | D          | 1.29                                | 0.73 to 2.26  |           |               |
|                                 | E          | 2.03 **                             | 1.2 to 3.42   |           |               |
| Education                       | University |                                     |               | Reference |               |
|                                 | A-level    |                                     |               | 1.16      | 0.72 to 1.88  |
|                                 | GCSE       |                                     |               | 1.17      | 0.76 to 1.79  |
|                                 | Other      |                                     |               | 1.50      | 0.81 to 2.81  |
|                                 | None       |                                     |               | 1.52      | 0.9 to 2.58   |
| Constant                        |            | 0.01 ***                            | 0 to 0.06     | 0.01 ***  | 0 to 0.06     |

Key: \* p&lt;0.05, \*\* p&lt;0.01, \*\*\*, p&lt;0.001

**Table S13 - Logistic regression results for factors associated with likelihood of receiving Brief Intervention for risky alcohol use: socioeconomic-adjusted models 3 & 4**

|                                 |            | Socioeconomic-adjusted models 3 & 4 |               |           |               |
|---------------------------------|------------|-------------------------------------|---------------|-----------|---------------|
|                                 |            | OR                                  | 95% CI        | OR        | 95% CI        |
| Age                             | 18-24      | Reference                           |               |           |               |
|                                 | 25-34      | 1.60                                | 0.8 to 3.21   | 1.59      | 0.81 to 3.12  |
|                                 | 35-44      | 2.49 **                             | 1.29 to 4.82  | 2.69 **   | 1.4 to 5.15   |
|                                 | 45-54      | 3.48 ***                            | 1.94 to 6.25  | 3.81 ***  | 2.13 to 6.82  |
|                                 | 55-64      | 3.44 ***                            | 1.88 to 6.3   | 4.18 ***  | 2.19 to 7.97  |
|                                 | 65+        | 4.78 ***                            | 2.6 to 8.8    | 6.78 ***  | 3.54 to 13.01 |
| Gender                          | Male       | Reference                           |               |           |               |
|                                 | Female     | 0.58 **                             | 0.4 to 0.84   | 0.60 **   | 0.42 to 0.87  |
| Region                          | North      | Reference                           |               |           |               |
|                                 | Midlands   | 1.19                                | 0.8 to 1.78   | 1.23      | 0.82 to 1.83  |
|                                 | South      | 0.76                                | 0.53 to 1.08  | 0.77      | 0.53 to 1.1   |
| Children in the household       | None       | Reference                           |               |           |               |
|                                 | ≥1         | 1.09                                | 0.7 to 1.69   | 1.03      | 0.66 to 1.59  |
| Self-reported disability        | No         | Reference                           |               |           |               |
|                                 | Yes        | 2.10 ***                            | 1.43 to 3.09  | 2.10 ***  | 1.43 to 3.08  |
| Ethnicity                       | White      | Reference                           |               |           |               |
|                                 | Mixed race | 2.18                                | 0.73 to 6.52  | 2.15      | 0.72 to 6.41  |
|                                 | Asian      | 0.69                                | 0.14 to 3.5   | 0.62      | 0.12 to 3.24  |
|                                 | Black      | 0.15                                | 0.02 to 1.11  | 0.16      | 0.02 to 1.1   |
|                                 | Arab/other | 8.36 *                              | 1.55 to 45.13 | 9.37 **   | 1.86 to 47.14 |
| Time trend (monthly)            |            | 1.00                                | 0.98 to 1.02  | 1.00      | 0.98 to 1.02  |
| Past year smoker                | No         | Reference                           |               |           |               |
|                                 | Yes        | 1.20                                | 0.86 to 1.67  | 1.08      | 0.77 to 1.51  |
| Motivation to cut down drinking | None       | Reference                           |               |           |               |
|                                 | Moderate   | 2.93 ***                            | 2.04 to 4.22  | 2.88 ***  | 2 to 4.14     |
|                                 | High       | 5.25 ***                            | 3.3 to 8.37   | 5.28 ***  | 3.31 to 8.4   |
| AUDIT Score                     | 8-15       | Reference                           |               |           |               |
|                                 | 16-19      | 2.88 ***                            | 1.74 to 4.76  | 2.95 ***  | 1.77 to 4.9   |
|                                 | 20+        | 11.09 ***                           | 7.2 to 17.1   | 12.06 *** | 7.81 to 18.62 |
| Employment status               | Full-time  | Reference                           |               |           |               |
|                                 | Other      | 1.53 *                              | 1.06 to 2.21  |           |               |
| Housing tenure                  | Owned      |                                     |               | Reference |               |
|                                 | Rented     |                                     |               | 1.49 *    | 1.05 to 2.13  |
| Constant                        |            | 0.01 ***                            | 0 to 0.06     | 0.01 ***  | 0 to 0.06     |

Key: \* p&lt;0.05, \*\* p&lt;0.01, \*\*\*, p&lt;0.001

**Figure S2 - Independent effects of four measures of socioeconomic status on Odds Ratio of receiving a Brief Intervention for smoking or risky drinking**

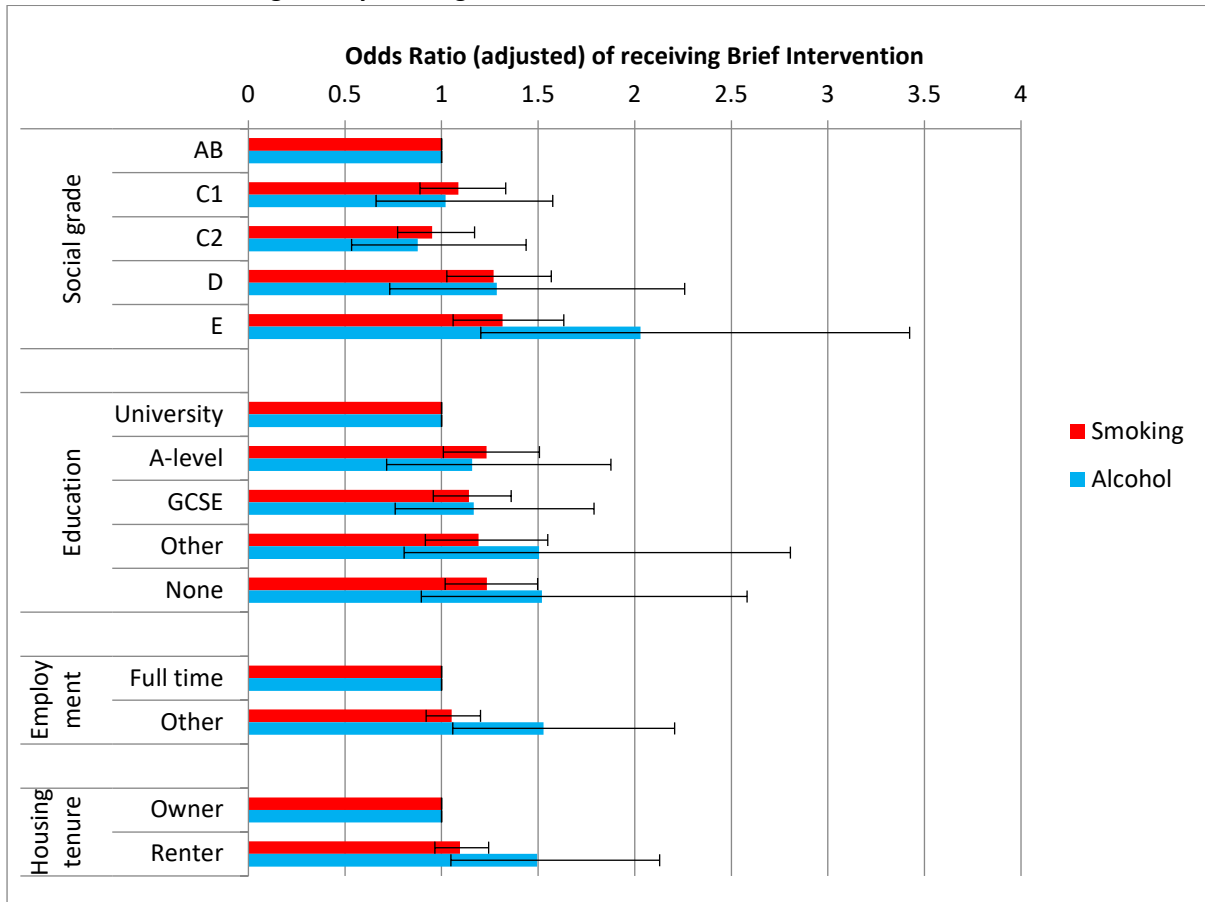



## Descriptive statistics

Table S14 – Unweighted Ns underlying Table 2

|                | Past year smokers        |                         |                          | Risky drinkers           |                         |                          |
|----------------|--------------------------|-------------------------|--------------------------|--------------------------|-------------------------|--------------------------|
|                | Prevalence in population | Visited GP in past year | Received BI   visited GP | Prevalence in population | Visited GP in past year | Received BI   visited GP |
| Population     | 10067                    | 6513                    | 3237                     | 6089                     | 3975                    | 258                      |
|                |                          |                         |                          |                          |                         |                          |
| Social grade   |                          |                         |                          |                          |                         |                          |
| AB             | 1186                     | 770                     | 365                      | 1437                     | 995                     | 73                       |
| C1             | 2639                     | 1698                    | 824                      | 2145                     | 1413                    | 90                       |
| C2             | 2337                     | 1431                    | 667                      | 1207                     | 747                     | 52                       |
| D              | 2060                     | 1314                    | 664                      | 715                      | 466                     | 38                       |
| E              | 1845                     | 1300                    | 717                      | 585                      | 354                     | 71                       |
|                |                          |                         |                          |                          |                         |                          |
| Education      |                          |                         |                          |                          |                         |                          |
| University     | 1721                     | 1063                    | 485                      | 1707                     | 1142                    | 82                       |
| A-level        | 1866                     | 1157                    | 570                      | 1669                     | 980                     | 57                       |
| GCSE           | 3518                     | 2296                    | 1111                     | 1711                     | 1141                    | 100                      |
| Other          | 714                      | 474                     | 243                      | 424                      | 301                     | 31                       |
| None           | 2184                     | 1479                    | 799                      | 556                      | 393                     | 52                       |
|                |                          |                         |                          |                          |                         |                          |
| Employment     |                          |                         |                          |                          |                         |                          |
| Full time      | 3593                     | 2051                    | 962                      | 3511                     | 2414                    | 231                      |
| Other          | 6467                     | 4459                    | 2273                     | 2575                     | 1559                    | 91                       |
|                |                          |                         |                          |                          |                         |                          |
| Housing tenure |                          |                         |                          |                          |                         |                          |
| Owner          | 6043                     | 3889                    | 1952                     | 2621                     | 1600                    | 155                      |
| Renter         | 3861                     | 2537                    | 1246                     | 3377                     | 2322                    | 166                      |

## Main analysis – additional model results

### Behaviour-adjusted model results for smoking

**Table S15 – Logistic regression results for factors associated with likelihood of receiving Brief Intervention for smoking**

|                                |            | Behaviour-adjusted model |              |
|--------------------------------|------------|--------------------------|--------------|
|                                |            | OR                       | 95% CI       |
| Age                            | 18-24      |                          |              |
|                                | 25-34      | 1.36 **                  | 1.12 to 1.65 |
|                                | 35-44      | 1.56 ***                 | 1.28 to 1.91 |
|                                | 45-54      | 1.98 ***                 | 1.63 to 2.41 |
|                                | 55-64      | 2.23 ***                 | 1.81 to 2.75 |
|                                | 65+        | 2.14 ***                 | 1.73 to 2.65 |
| Gender                         | Male       |                          |              |
|                                | Female     | 0.97                     | 0.86 to 1.09 |
| Region                         | North      |                          |              |
|                                | Midlands   | 0.93                     | 0.81 to 1.07 |
|                                | South      | 0.78 ***                 | 0.68 to 0.89 |
| Children in the household      | None       |                          |              |
|                                | ≥1         | 1.08                     | 0.94 to 1.25 |
| Self-reported disability       | No         |                          |              |
|                                | Yes        | 1.40 ***                 | 1.21 to 1.62 |
| Ethnicity                      | White      |                          |              |
|                                | Mixed race | 0.87                     | 0.56 to 1.35 |
|                                | Asian      | 0.86                     | 0.67 to 1.11 |
|                                | Black      | 1.00                     | 0.68 to 1.49 |
|                                | Arab/other | 0.92                     | 0.51 to 1.66 |
| Time trend (monthly)           |            | 1.00                     | 1 to 1.01    |
| Risky drinker (AUDIT 8+)       | No         | Reference                |              |
|                                | Yes        | 0.84 *                   | 0.73 to 0.97 |
| Motivation to cut down smoking | None       | Reference                |              |
|                                | Moderate   | 1.42 ***                 | 1.25 to 1.63 |
|                                | High       | 2.14 ***                 | 1.79 to 2.57 |
| Constant                       |            | 0.37 *                   | 0.17 to 0.8  |

## Behaviour-adjusted model results for risky drinking

Table S16– Logistic regression results for factors associated with likelihood of receiving Brief Intervention for risky drinking

|                                 |            | Behaviour-adjusted model |     |               |
|---------------------------------|------------|--------------------------|-----|---------------|
|                                 |            | OR                       |     | 95% CI        |
| Age                             | 18-24      |                          |     |               |
|                                 | 25-34      | 1.44                     |     | 0.76 to 2.75  |
|                                 | 35-44      | 2.11                     | *   | 1.12 to 3.96  |
|                                 | 45-54      | 3.00                     | *** | 1.72 to 5.23  |
|                                 | 55-64      | 3.30                     | *** | 1.8 to 6.03   |
|                                 | 65+        | 5.00                     | *** | 2.71 to 9.23  |
| Gender                          | Male       |                          |     |               |
|                                 | Female     | 0.64                     | *   | 0.45 to 0.91  |
| Region                          | North      |                          |     |               |
|                                 | Midlands   | 1.18                     |     | 0.8 to 1.75   |
|                                 | South      | 0.80                     |     | 0.56 to 1.13  |
| Children in the household       | None       |                          |     |               |
|                                 | ≥1         | 1.06                     |     | 0.69 to 1.63  |
| Self-reported disability        | No         |                          |     |               |
|                                 | Yes        | 2.27                     | *** | 1.57 to 3.27  |
| Ethnicity                       | White      |                          |     |               |
|                                 | Mixed race | 2.19                     |     | 0.7 to 6.86   |
|                                 | Asian      | 3.38                     |     | 0.68 to 16.88 |
|                                 | Black      | 0.19                     |     | 0.02 to 1.62  |
|                                 | Arab/other | 8.64                     | **  | 1.81 to 41.21 |
| Time trend (monthly)            |            | 1.00                     |     | 0.98 to 1.02  |
| Past year smoker                | No         | Reference                |     |               |
|                                 | Yes        | 1.20                     |     | 0.86 to 1.66  |
| Motivation to cut down drinking | None       | Reference                |     |               |
|                                 | Moderate   | 2.85                     | *** | 2 to 4.05     |
|                                 | High       | 5.17                     | *** | 3.29 to 8.14  |
| AUDIT Score                     | 8-15       | Reference                |     |               |
|                                 | 16-19      | 2.94                     | *** | 1.81 to 4.79  |
|                                 | 20+        | 11.84                    | *** | 7.77 to 18.04 |
| Constant                        |            | 0.01                     | *** | 0 to 0.08     |
